# Supplementary material
Source: HighWire-hosted journal article supplement (https://innovations.bmj.com/highwire/filestream/139096/field_highwire_adjunct_files/0/bmjinnov-2021-000860supp001_data_supplement.pdf)
Supplement: bmjinnov-2021-000860supp001_data_supplement.pdf [file bmjinnov-2021-000860supp001_data_supplement.pdf]

# Future developments and new technologies in the field of faecal incontinence – scanning the horizon

Katie Thomson, Kim Dangova, Donna Bliss, Sheila A Wallace, Holly E Richter, Fiona Pearson

**Appendix 1:** Search terms for pipeline trials on faecal incontinence

**Appendix 2:** Inclusion/exclusion criteria

**Appendix 3:** Faecal incontinence domains

**Appendix 4:** References identified through horizon scanning subsequently excluded

**Appendix 5:** Included trials

## **Appendix 1:** Search terms for pipeline trials on faecal incontinence

The following search terms were used in NIHR Innovation Observatory's 'ScanMedicine' database (<https://www.scanmedicine.io/>). The search was conducted in August 2020.

(fecal incontinence) OR (defecation disorder) OR (encopresis) OR (soiling) OR (stool incontinence) OR (incontinent of stools) OR (leaking faeces) OR (faecal leakage) OR (stool leakage) OR (leakage of motions) OR (faecal soiling) OR (faecal urgency) OR (stool urgency) OR (faecal frequency) OR (hypotonic sphincter) OR (hypotonic anal sphincter) OR (pelvic dyssynergia) OR (faecal leakage) OR (faecal seepage) OR (faecal loss) OR (stool seepage) OR (leaking stools) OR (seepage of motions) OR (leaking of motions) OR (urgent defaecation) OR (frequent defaecation) OR (neurogenic bowel) OR (faecal continence) OR (stool continence) OR (anal continence) OR (anus continence) OR (bowel continence) OR (alvi continence) OR (alvi incontinence) OR (defecation urgency) OR (incontinence of wind) OR (incontinence of flatus)

Note on search terms: the interface works with natural language terms. Alternative spellings, for example, 'faecal' or 'fecal' were not needed as the interface allowed for alternative spellings. The interface did not work with truncation or adjacency and instead mapped alternative endings and word orders.

### The following search limits were applied:

Enrolment year  $\geq$  2015

Registries limited to: Brazil, Peru, USA, EU, AUSNZ, UK, India, Japan, South Korea, Thailand, and Sri Lanka

Trial recruitment status: excluding trials that were Suspended, Terminated, Withdrawn, or had an Unknown trial status

## **Appendix 2:** Inclusion/exclusion criteria

Articles were excluded as ‘wrong outcome’ if they contained outcomes that didn’t relate to FI.

Articles were excluded as ‘out of CI scope’ if they related to FI but were within the remit of another Cochrane group (e.g., Pregnancy and Childbirth).

| <b>Include</b>                                                                                                                                                                                                               | <b>Exclude</b>                                                                                                                                                      | <b>Reason for exclusion</b>                                                                                                                 |
|------------------------------------------------------------------------------------------------------------------------------------------------------------------------------------------------------------------------------|---------------------------------------------------------------------------------------------------------------------------------------------------------------------|---------------------------------------------------------------------------------------------------------------------------------------------|
| <b>Constipation</b> in elderly, children or neurogenic conditions, or any other population that cycles between constipation and FI                                                                                           | <b>Constipation</b> in adults, (without reference to cycling between constipation and FI), broad reviews, laxative prescribing or general reviews, during pregnancy | Constipation during pregnancy falls under the remit of Cochrane Pregnancy and Childbirth                                                    |
| <b>LARS</b> – with mention of treating the FI aspect of the syndrome that happens after LAR (keep as special batch) (LAR is covered by another group – they do not currently cover LARS but check with that Cochrane group?) | <b>LARS</b> – reconstruction techniques (anastomosis) or other surgeries and other alternative resection or re-joining of bowel.                                    | Covered by other Cochrane group(s)                                                                                                          |
| <b>Dermatitis</b> - Incontinence associated                                                                                                                                                                                  | <b>Dermatitis</b> - diaper wearing of infants or neonates                                                                                                           | Falls in the remit of another Cochrane Skin group                                                                                           |
| <b>Episiotomies</b> – treatment of long-term consequence if covers FI                                                                                                                                                        | <b>Episiotomies</b> – techniques and whether or not to do them                                                                                                      | Falls in the remit of another Cochrane group                                                                                                |
| <b>Repair of anal tears in the postpartum period is not included</b> but treatment of long-term consequences as regards FI are included                                                                                      | <b>Repair of anal tears postpartum</b>                                                                                                                              | Falls under the remit of a different Cochrane group unless it is treatment of long-term consequences or repair beyond the postpartum period |
| <b>Obesity</b> – weight loss to prevent/treat FI                                                                                                                                                                             | <b>Obesity</b>                                                                                                                                                      | This should be included if looking at weight loss to prevent or treat FI – if looking at other aspects of obesity not included              |
| Diagnosis – RCTs or diagnostic test accuracy                                                                                                                                                                                 | Aetiology of FI                                                                                                                                                     | Not within the scope of this project                                                                                                        |

|                                                                                                                                                 |                                                                                                                                           |                                                     |
|-------------------------------------------------------------------------------------------------------------------------------------------------|-------------------------------------------------------------------------------------------------------------------------------------------|-----------------------------------------------------|
| Guidelines (NICE) - If they include systematic review                                                                                           | Economics                                                                                                                                 | Outside the scope of this priority setting exercise |
| Recommendations - If they include systematic review                                                                                             | Commentary type papers                                                                                                                    | Not relevant                                        |
|                                                                                                                                                 | Epidemiology – prevalence/incidence/burden of disease                                                                                     | Not within the scope of this project                |
|                                                                                                                                                 | Comparative reviews looking at something else where FI is an outcome (e.g. surgery A vs Surgery B for rectal anal cancer or Radiotherapy) | The topics are covered by other Cochrane groups     |
|                                                                                                                                                 | QoL where looking at measuring or development of the scales                                                                               | Not directly relevant                               |
| Autism Spectrum Disorder (ASD) if related to prevention/treatment of FI in this population                                                      |                                                                                                                                           |                                                     |
| Stroke - Include if looking at prevention or treatment of FI in stroke patients – if looking at other aspects of stroke then it is not included |                                                                                                                                           |                                                     |
| Neurological conditions where the main focus seemed to be FI or related issues (spinal cord injury, multiple sclerosis)                         |                                                                                                                                           |                                                     |
| Neurogenic bowel                                                                                                                                |                                                                                                                                           |                                                     |
| Spinal cord injury - if looking at FI                                                                                                           |                                                                                                                                           |                                                     |
| Multiple sclerosis - if looking at FI                                                                                                           |                                                                                                                                           |                                                     |
| Cauda equine/tethered cord – if FI was one of the main topics                                                                                   |                                                                                                                                           |                                                     |
| Cancer - If looking at longer term consequences of cancer treatment once cancer has resolved                                                    | Bowel prep surgery (e.g. for cancer treatment)                                                                                            | Covered by other Cochrane groups                    |

|                                                                                      |                                                                         |                                                                                                                                         |
|--------------------------------------------------------------------------------------|-------------------------------------------------------------------------|-----------------------------------------------------------------------------------------------------------------------------------------|
|                                                                                      | Screening for <b>cancers</b> – most commonly bowel cancer               | Covered by other Cochrane groups                                                                                                        |
|                                                                                      | Ovarian cancer                                                          | Covered by other Cochrane groups                                                                                                        |
|                                                                                      | Prostate cancer                                                         | Covered by other Cochrane groups                                                                                                        |
|                                                                                      | Anal or Rectal or bowel or colorectal cancer                            | Covered by other Cochrane groups                                                                                                        |
| Pregnancy / Postpartum Complications that include FI or FI affecting sexual function | Comparing obstetric practices                                           | Covered by Cochrane Pregnancy and Childbirth group (we do cover prevention and treatment of FI using physical therapies pre/postpartum) |
| Rectovaginal fistula                                                                 | Obstetric anal sphincter injury (OASIS)                                 | Falls under the remit of Cochrane Pregnancy and Childbirth                                                                              |
|                                                                                      | Crohn's disease, Diverticulitis, IBS/IBD, Ulcerative colitis, Diarrhoea | Covered by Cochrane Incontinence but different topic area or covered by Cochrane group(s)                                               |
|                                                                                      | Haemorrhoids                                                            | Covered by another Cochrane group                                                                                                       |
|                                                                                      | Fistula in ano / anal fissure                                           | Covered by another Cochrane group                                                                                                       |
|                                                                                      | Pouches, colostomies, stomas or anastomoses                             | Covered by other Cochrane groups                                                                                                        |
|                                                                                      | Rectal prolapse/rectocele                                               | A different part of our scope                                                                                                           |
|                                                                                      | Anastomotic leakage or leakage related to stomas or colostomies,        | Covered by other Cochrane groups                                                                                                        |
|                                                                                      | Bladder surgery/neobladders/cystoplasty/Urinary diversion               | Not within the scope of this project – partly covered by another of our reviews                                                         |
|                                                                                      | Urinary incontinence (with no mention of FI or 'double incontinence')   | Covered by a different part of our group's scope                                                                                        |
|                                                                                      | Pelvic organ prolapse                                                   | Covered by a different part of our group's scope (includes posterior vaginal wall prolapse)                                             |
| Frail elderly syndrome                                                               | Congenital malformations                                                | Not within the scope of Cochrane Incontinence                                                                                           |

|                                                                                                                                                                                                  |                                                            |                                   |
|--------------------------------------------------------------------------------------------------------------------------------------------------------------------------------------------------|------------------------------------------------------------|-----------------------------------|
| Lifestyle interventions – weight loss and other lifestyle interventions for prevent/treat FI                                                                                                     | Surgery to correct congenital defects and/or malformations | Covered by other Cochrane groups  |
| Pelvic floor exercises and other interventions to try to prevent and treat FI during and after pregnancy as well as longer term. We do cover long term effects of birth injuries as regards FI.  | Hirschsprung's disease                                     | Covered by another Cochrane group |
| Weight loss - treatment or prevention of FI                                                                                                                                                      |                                                            |                                   |
| Encopresis                                                                                                                                                                                       |                                                            |                                   |
| Specific mention of treatment, prevention, management, diagnostic test accuracy for, FI (with or without constipation) (with or without urinary incontinence) then it is a very definite include |                                                            |                                   |

### **Appendix 3:** Faecal incontinence domains

#### **Bowel management**

- General
- Assistive techniques
- Bowel habit/retraining
- Complementary therapies
- Dietary management
- Education
- Electrical stimulation
- Lifestyle
- Magnetic stimulation
- Pelvic floor muscle training/ biofeedback/ sphincter exercises
- Physiotherapy
- Psychological/ behavioural/ urgency suppression techniques
- Self-management
- Volumetric/breathing exercises
- Weight management

#### **Bowel management for neurological conditions**

- Anticholinesterase plus an anticholinergic drug
- Assistive techniques
- Bowel programmes/ bowel care
- Devices
- Electrical stimulation
- Fibre
- Physiotherapy
- Surgery

#### **Bowel and bladder dysfunction**

- Bladder pain syndrome
- Constipation (including in children)
- FI and delayed toilet training as a result of chronic constipation

- FI in children
- Link between constipation and urinary incontinence
- Urinary and/or FI

### **Drugs**

- General
- Anti-diarrhoeal agents
- Botulinum toxin type A
- Clonidine
- Drugs acting on anal sphincter tone
- Enemas
- Fibre
- Laxatives
- Oestrogen therapy
- Pipeline drugs
- Repurposed drugs
- Stool-forming agents
- suppositories

### **Surgery**

- General
- Antegrade irrigation
- Artificial anal sphincter
- Bariatric surgery
- Dynamic graciloplasty
- Gluteoplasty
- Injectable bulking agents
- levatorplasty (anterior) - repairing the pelvic floor
- Magnetic sphincter formation
- Microballoons
- Muscle transposition
- New surgical procedures
- Ostomies (colostomy and ileostomy)

- Post anal repair
- Posterior tibial nerve stimulation
- Radiofrequency
- Repair of posterior compartment prolapse
- Repair of rectal prolapse
- Sacral nerve stimulation (implanted)
- Slings
- Sphincteroplasty
- Sphincter repair
- Stem cells
- Total pelvic floor repair (TPFR)

#### **Models of care**

- Clinical pathway to diagnosis
- Evidence-based practice
- General - models of care
- GP
- Nurse led
- Transition of care

#### **Mechanical devices**

- Absorbent products
- Anal plugs
- Anal pouch
- Commodes
- Inserts (including vaginal inserts)
- Managing condition
- New devices (e.g. intra-rectal diversion devices)
- Rectal catheters (used for critically-ill patients)
- Rectal trumpet (off-label use)
- Vaginal-bowel devices

#### **Other containment/ non-active/ other in non-neurogenic patients**

- Toileting assistance programmes
- Trans-anal irrigation

#### **Interventions in particular settings**

- Acute care settings
- Bowel management in low-resource settings
- Improvements to physical environment
- Products for odour and sounds
- Toileting assistance programmes
- Wireless technology monitoring wetness sensors - nursing home

#### **Interventions in particular populations**

- Diabetes and FI
- Management of FI for cancer patients
- Post-menopausal women
- Pregnant/post-partum women

#### **Other**

- Compliance
- Dermatitis
- Diagnostic tools
- Financial support
- Microbial transplant
- Pressure sores
- Psychological support
- Qualitative research/ mixed methods/ lived experiences
- Quality of life
- Technology
- Treatments that are not pharmaceuticals or naturopathic
- Unsure

#### **Out of scope**

- Disposal of products
- Mechanisms and causes
- Prevalence
- Prevention of FI

#### **Appendix 4:** References identified through horizon scanning subsequently excluded

Detailed below are the clinical trials references identified through horizon scanning searches subsequently excluded. Exclusion was for one of the following reasons indicated in order of hierarchical importance:

|                                                                    |          |
|--------------------------------------------------------------------|----------|
| Records removed after filtration by trial status (n=52)            | 1-52     |
| Records excluded based on primary health condition studied (n=863) | 53-915   |
| Study's exclusion criteria included FI (n=4)                       | 916-919  |
| Healthy subjects (n=2)                                             | 920, 921 |
| Questionnaire, screening and tool assessment validation (n=7)      | 922-928  |
| Not relevant/within the scope (n=9)                                | 929-937  |

- 1 Clinical Trials Registry - India (CTRI). A study of cefepimetazobactam (FEPTAZ) in complicated urinary tract infection (cUTI) or acute pyelonephritis (AP). Trial ID: CTRI/2019/01/016861. 2019. Status: Suspended. Available from: <http://ctri.nic.in/Clinicaltrials/pmaindet2.php?trialid=27769> [Accessed 11 August 2020].
- 2 ISRCTN Registry. A study investigating a continuous local anaesthetic infusion for pain relief after pelvic tumour surgery. Trial ID: ISRCTN60374925. 2015. Status: Stopped. Available from: <http://www.isrctn.com/ISRCTN60374925> [Accessed 11 August 2020].
- 3 Clinicaltrials.gov. Efficacy and Safety of Polyethylene Glycol 3350 (PEG 3350) for Relief of Constipation (MK-8114-005). Trial ID: NCT02292459. 2014. Status: Withdrawn. Available from: <https://clinicaltrials.gov/ct2/show/record/NCT02292459> [Accessed 11 August 2020].
- 4 Clinicaltrials.gov. Surgery With or Without Postoperative Intensity Modulated Radiation Therapy in Treating Patients With Urothelial Bladder Cancer. Trial ID: NCT02316548. 2014. Status: Terminated. Available from: <https://clinicaltrials.gov/ct2/show/record/NCT02316548> [Accessed 11 August 2020].
- 5 Clinicaltrials.gov. Treatment of Septic Shock by Inhibiting Autodigestion and Preserving Gut Integrity With Enteric LB1148 (SSAIL). Trial ID: NCT02317549. 2014. Status: Terminated. Available from: <https://clinicaltrials.gov/ct2/show/record/NCT02317549> [Accessed 11 August 2020].
- 6 Clinicaltrials.gov. The Effect of Episiotomy on Maternal and Fetal Outcomes (EPITRIAL). Trial ID: NCT02356237. 2015. Status: Terminated. Available from: <https://clinicaltrials.gov/ct2/show/record/NCT02356237> [Accessed 11 August 2020].
- 7 Clinicaltrials.gov. Sacral Neuromodulation in Dual Incontinence: Ultrasound and Afferent Nerve Sensation Assessment (SaNDI). Trial ID: NCT02357784. 2015. Status: Suspended. Available from: <https://clinicaltrials.gov/ct2/show/record/NCT02357784> [Accessed 11 August 2020].
- 8 Clinicaltrials.gov. Dose Escalated MRSI Guided Radiation Therapy in Glioblastoma. Trial ID: NCT02394665. 2015. Status: Terminated. Available from: <https://clinicaltrials.gov/ct2/show/record/NCT02394665> [Accessed 11 August 2020].
- 9 Clinicaltrials.gov. Evaluation of Safety and Effectiveness of the FMwand Ferromagnetic Surgical System during total Mesorectal Excision Surgery. Trial ID: NCT02423174. 2015. Status: Withdrawn. Available from: <https://clinicaltrials.gov/ct2/show/record/NCT02423174> [Accessed 11 August 2020].

- 10 Clinicaltrials.gov. Unilateral Nerve-Sparing Cryoablation for Low-Risk- Clinically Localized- Unilateral Prostate Cancer (POTENT-C). Trial ID: NCT02459912. 2015. Status: Terminated. Available from: <https://clinicaltrials.gov/ct2/show/record/NCT02459912> [Accessed 11 August 2020].
- 11 Clinicaltrials.gov. The Influence of Probiotics on Body Weight and Composition (WLP). Trial ID: NCT02465294. 2015. Status: Withdrawn. Available from: <https://clinicaltrials.gov/ct2/show/record/NCT02465294> [Accessed 11 August 2020].
- 12 Clinicaltrials.gov. Comparison of Wash Wipes and Standard Care in the Prevention of Incontinence-associated Dermatitis in Elderly. Trial ID: NCT02475512. 2015. Status: Terminated. Available from: <https://clinicaltrials.gov/ct2/show/record/NCT02475512> [Accessed 11 August 2020].
- 13 Clinicaltrials.gov. Stereotactic Body Radiation Therapy and Transarterial Chemoembolization in Treating Patients With Liver Cancer That Cannot Be Removed by Surgery. Trial ID: NCT02507765. 2015. Status: Suspended. Available from: <https://clinicaltrials.gov/ct2/show/record/NCT02507765> [Accessed 11 August 2020].
- 14 Clinicaltrials.gov. Efficacy and Safety Study of Sirukumab in Patients With Giant Cell Arteritis. Trial ID: NCT02531633. 2015. Status: Terminated. Available from: <https://clinicaltrials.gov/ct2/show/record/NCT02531633> [Accessed 11 August 2020].
- 15 Clinicaltrials.gov. Talazoparib in Treating Patients With Advanced or Metastatic Solid Tumors That Cannot Be Removed by Surgery and Liver or Kidney Dysfunction. Trial ID: NCT02567396. 2015. Status: Withdrawn. Available from: <https://clinicaltrials.gov/ct2/show/record/NCT02567396> [Accessed 11 August 2020].
- 16 Clinicaltrials.gov. Treating Anorectal Dysfunction in MS. Trial ID: NCT02609607. 2015. Status: Terminated. Available from: <https://clinicaltrials.gov/ct2/show/record/NCT02609607> [Accessed 11 August 2020].
- 17 Clinicaltrials.gov. Ibrutinib or Idelalisib in Treating Patients With Persistent or Relapsed Chronic Lymphocytic Leukemia- Small Lymphocytic Lymphoma- or Non-Hodgkin Lymphoma After Donor Stem Cell Transplant. Trial ID: NCT02662296. 2016. Status: Withdrawn. Available from: <https://clinicaltrials.gov/ct2/show/record/NCT02662296> [Accessed 11 August 2020].
- 18 Clinicaltrials.gov. AlloGeneic Human Mesenchymal Stem Cells (hMSC) in Patients With Fistulizing Crohn's Disease Via Perifistula injections (GALENE) (GALENE). Trial ID: NCT02677350. 2016. Status: Withdrawn. Available from: <https://clinicaltrials.gov/ct2/show/record/NCT02677350> [Accessed 11 August 2020].
- 19 Clinicaltrials.gov. Feasibility Study to Assess the Early Use of Porcine Cross-linked Collagen Paste in Cryptoglandular Anorectal Fistulas (FIX-IT1). Trial ID: NCT02686580. 2015. Status: Terminated. Available from: <https://clinicaltrials.gov/ct2/show/record/NCT02686580> [Accessed 11 August 2020].
- 20 Clinicaltrials.gov. Pilot Trial of the Effect of Vorinostat and AGS-004 on Persistent HIV-1 Infection (VORVAX). Trial ID: NCT02707900. 2016. Status: Terminated. Available from: <https://clinicaltrials.gov/ct2/show/record/NCT02707900> [Accessed 11 August 2020].
- 21 Clinicaltrials.gov. A Phase I- Dose Escalation Study of BNC101 in Patients With Metastatic Colorectal Cancer. Trial ID: NCT02726334. 2016. Status: Terminated. Available from: <https://clinicaltrials.gov/ct2/show/record/NCT02726334> [Accessed 11 August 2020].
- 22 Clinicaltrials.gov. Phase 4- Vedolizumab-4002 Post-marketing- Disease-Drug-Drug Interaction Study. Trial ID: NCT02760615. 2016. Status: Suspended. Available from: <https://clinicaltrials.gov/ct2/show/record/NCT02760615> [Accessed 11 August 2020].
- 23 Clinicaltrials.gov. BAFIARS - Biomedical Assessment of Function and Imaging of the Ano-rectal Sphincter. Trial ID: NCT02778048. 2016. Status: Suspended. Available from: <https://clinicaltrials.gov/ct2/show/record/NCT02778048> [Accessed 11 August 2020].
- 24 Clinicaltrials.gov. A Pilot Study of the Effects of Mirabegron on Symptoms in Patients With Interstitial Cystitis (MirabegronIC). Trial ID: NCT02787083. 2016. Status: Terminated. Available from: <https://clinicaltrials.gov/ct2/show/record/NCT02787083> [Accessed 11 August 2020].

- 25 Clinicaltrials.gov. A Phase II Study of High Dose Bolus IL2 in Patients With Inoperable Stage III or Stage IV Melanoma Who Have Failed Prior Anti-PD1 Immunotherapy: Efficacy and Biomarker Study. Trial ID: NCT02796352. 2016. Status: Terminated. Available from: <https://clinicaltrials.gov/ct2/show/record/NCT02796352> [Accessed 11 August 2020].
- 26 Clinicaltrials.gov. Tolerability- Safety and Efficacy of a New Frequency of Vibrant Capsule Administration. Trial ID: NCT02829047. 2016. Status: Terminated. Available from: <https://clinicaltrials.gov/ct2/show/record/NCT02829047> [Accessed 11 August 2020].
- 27 Clinicaltrials.gov. Tolerability- Safety- and Feasibility of Naloxegol in Patients With Cancer and OIC (Opioid Induced Constipation). Trial ID: NCT02839889. 2016. Status: Terminated. Available from: <https://clinicaltrials.gov/ct2/show/record/NCT02839889> [Accessed 11 August 2020].
- 28 Clinicaltrials.gov. Genetic Determinism of Epithelial Barrier Defects in Irritable Bowel Syndrome (PROTIBS). Trial ID: NCT02841878. 2015. Status: Withdrawn. Available from: <https://clinicaltrials.gov/ct2/show/record/NCT02841878> [Accessed 11 August 2020].
- 29 Clinicaltrials.gov. Ease of Use- Tolerability- Efficacy and Safety of the Vibrant Capsule Administered in the Home Environment. Trial ID: NCT02895516. 2016. Status: Withdrawn. Available from: <https://clinicaltrials.gov/ct2/show/record/NCT02895516> [Accessed 11 August 2020].
- 30 Clinicaltrials.gov. Study to Investigate the Safety- Pharmacokinetics- Pharmacodynamics and Preliminary Clinical Activity of Defactinib in Combination With Avelumab in Epithelial Ovarian Cancer. Trial ID: NCT02943317. 2016. Status: Terminated. Available from: <https://clinicaltrials.gov/ct2/show/record/NCT02943317> [Accessed 11 August 2020].
- 31 Clinicaltrials.gov. Olanzapine for the Treatment of Refractory Chronic Nausea and Vomiting. Trial ID: NCT02977741. 2016. Status: Withdrawn. Available from: <https://clinicaltrials.gov/ct2/show/record/NCT02977741> [Accessed 11 August 2020].
- 32 Clinicaltrials.gov. Vorinostat in Patients With Class 2 High Risk Uveal Melanoma. Trial ID: NCT03022565. 2016. Status: Withdrawn. Available from: <https://clinicaltrials.gov/ct2/show/record/NCT03022565> [Accessed 11 August 2020].
- 33 Clinicaltrials.gov. Evaluation of an Incontinence Product. Trial ID: NCT03023072. 2017. Status: Terminated. Available from: <https://clinicaltrials.gov/ct2/show/record/NCT03023072> [Accessed 11 August 2020].
- 34 Clinicaltrials.gov. A Pilot Study Of Ga-68-DOTA-TOC Imaging In Participants With Small Bowel Carcinoid Tumors. Trial ID: NCT03057509. 2017. Status: Withdrawn. Available from: <https://clinicaltrials.gov/ct2/show/record/NCT03057509> [Accessed 11 August 2020].
- 35 Clinicaltrials.gov. Utility of Bowel Ultrasound in Diagnosing Necrotizing Enterocolitis in Congenital Heart Disease. Trial ID: NCT03142685. 2017. Status: Withdrawn. Available from: <https://clinicaltrials.gov/ct2/show/record/NCT03142685> [Accessed 11 August 2020].
- 36 Clinicaltrials.gov. Tazemetostat in Treating Patients With Metastatic or Unresectable Solid Tumors or B-Cell Lymphomas With Liver Dysfunction. Trial ID: NCT03217253. 2017. Status: Withdrawn. Available from: <https://clinicaltrials.gov/ct2/show/record/NCT03217253> [Accessed 11 August 2020].
- 37 Clinicaltrials.gov. Trametinib in Patients With Advanced Neurofibromatosis Type 1 (NF1)-Mutant Non-small Cell Lung Cancer. Trial ID: NCT03232892. 2017. Status: Terminated. Available from: <https://clinicaltrials.gov/ct2/show/record/NCT03232892> [Accessed 11 August 2020].
- 38 Clinicaltrials.gov. Comparative Study to Assess an Advanced Skin Protectant in the Management of Incontinence-associated Dermatitis. Trial ID: NCT03298113. 2017. Status: Terminated. Available from: <https://clinicaltrials.gov/ct2/show/record/NCT03298113> [Accessed 11 August 2020].
- 39 Clinicaltrials.gov. The Use of Lactobacillus Reuteri in Functional Constipation in Children. Trial ID: NCT03333070. 2017. Status: Terminated. Available from: <https://clinicaltrials.gov/ct2/show/record/NCT03333070> [Accessed 11 August 2020].

- 40 Clinicaltrials.gov. HyGleaCare Procedure for Chronic Constipation. Trial ID: NCT03335969. 2017. Status: Withdrawn. Available from: <https://clinicaltrials.gov/ct2/show/record/NCT03335969> [Accessed 11 August 2020].
- 41 Clinicaltrials.gov. Effects of Eluxadoline (Viberzi ) 100 mg Twice Daily on Diarrhea-Associated Fecal Incontinence (ELXDFI). Trial ID: NCT03489265. 2018. Status: Withdrawn. Available from: <https://clinicaltrials.gov/ct2/show/record/NCT03489265> [Accessed 11 August 2020].
- 42 Clinicaltrials.gov. Effect of Real-world Tight Control Management of Inflammatory Bowel Disease. Trial ID: NCT03633669. 2018. Status: Withdrawn. Available from: <https://clinicaltrials.gov/ct2/show/record/NCT03633669> [Accessed 11 August 2020].
- 43 Clinicaltrials.gov. A Study of the Role of Circulating Tumor DNA in Predicting the Likelihood of Organ Preservation After Clinical Complete Response to Neoadjuvant Therapy for Rectal Cancer. Trial ID: NCT03749083. 2018. Status: Withdrawn. Available from: <https://clinicaltrials.gov/ct2/show/record/NCT03749083> [Accessed 11 August 2020].
- 44 Clinicaltrials.gov. Lanreotide Combined With Telotristat Ethyl or Placebo for the First-line Treatment in Patients With Advanced Well Differentiated Small Intestinal Neuroendocrine Tumours (siNET) With Highly-functioning Carcinoid Syndrome (TELEFIRST). Trial ID: NCT04065165. 2019. Status: Withdrawn. Available from: <https://clinicaltrials.gov/ct2/show/record/NCT04065165> [Accessed 11 August 2020].
- 45 Clinicaltrials.gov. Sandostatin (Octreotide LAR) May Lead to Clinical Improvement Through Receptor Occupation Optimisation (SCIROCCO). Trial ID: NCT04140409. 2019. Status: Terminated. Available from: <https://clinicaltrials.gov/ct2/show/record/NCT04140409> [Accessed 11 August 2020].
- 46 Australian New Zealand Clinical Trials Registry (ANZCTR). Assessing the quality of bowel preparation by addition of Movicol to standard bowel preparation regimen in patients undergoing routine colonoscopy: a randomized controlled trial. Trial ID: ACTRN12616000712404. 2016. Status: Terminated. Available from: <https://www.anzctr.org.au/Trial/Registration/TrialReview.aspx?id=369666&isReview=true> [Accessed 11 August 2020].
- 47 Australian New Zealand Clinical Trials Registry (ANZCTR). Efficacy of oral- capsulised- frozen faecal matter transplant for the treatment of clostridium difficile diarrhoea. Trial ID: ACTRN12616000746437p. 2016. Status: Withdrawn. Available from: <https://www.anzctr.org.au/Trial/Registration/TrialReview.aspx?id=370740&isReview=true> [Accessed 11 August 2020].
- 48 Australian New Zealand Clinical Trials Registry (ANZCTR). The Canadian version of the food for irritable bowel syndrome study. Trial ID: ACTRN12616001149459. 2016. Status: Terminated. Available from: <https://www.anzctr.org.au/Trial/Registration/TrialReview.aspx?id=371306&isReview=true> [Accessed 11 August 2020].
- 49 Australian New Zealand Clinical Trials Registry (ANZCTR). The effect of a low fermentable oligosaccharide- disaccharide- monosaccharide and polyol (FODMAP) diet on intestinal transit- the intestinal microbiome and metabolome in adults with irritable bowel syndrome.. Trial ID: ACTRN12617000465358. 2017. Status: Terminated. Available from: <https://www.anzctr.org.au/Trial/Registration/TrialReview.aspx?id=372644&isReview=true> [Accessed 11 August 2020].
- 50 Australian New Zealand Clinical Trials Registry (ANZCTR). Bugs'n'Bones Study: The relationship between your diet- gut bacteria and bones. Trial ID: ACTRN12617000802303. 2017. Status: Terminated. Available from: <https://www.anzctr.org.au/Trial/Registration/TrialReview.aspx?id=373020&isReview=true> [Accessed 11 August 2020].
- 51 EU Clinical Trials Register. Prospective study investigating efficacy of lanreotide on decrease of chemotherapy induced diarrhoea (CID) in patients with colorectal carcinoma. Prospektivn studie zkoumaj cinnost lanreotidu na sn en pr jmu vyvolan ho chemoterapi u pacient s kolorekt ln m karcinomem; STOPRHEA STOPRHEA. Trial ID: 2014-004473-16/CZ. 2016. Status: Prematurely Ended. Available from: <https://www.clinicaltrialsregister.eu/ctr-search/trial/2014-004473-16/CZ> [Accessed 11 August 2020].
- 52 EU Clinical Trials Register. A Phase II- multicentre- randomised- double-blind- placebo controlled- proof of concept study of efficacy and safety of Rifamycin SV-MMX 600 mg tablets administered three or two times daily to patients with diarrhoea- predominant irritable bowel syndrome (IBS-D) Estudio fase II de prueba de concepto- multic ntrico- aleatorizado- doble ciego y

- controlado con placebo de la eficacia y la seguridad de comprimidos de rifamicina SV-MMX 600 mg administrados tres o dos veces al día a pacientes con síndrome del intestino irritable con diarrea predominante (SII-D). Trial ID: 2016-004977-42/ES. 2017. Status: Temporarily Halted. Available from: <https://www.clinicaltrialsregister.eu/ctr-search/trial/2016-004977-42/ES> [Accessed 11 August 2020].
- 53 Clinicaltrials.gov. M-Vax + Low Dose Interleukin-2 Versus Placebo Vaccine in Metastatic Melanoma in Patients With Stage IV Melanoma. Trial ID: NCT00477906. 2007. Status: Not Yet Recruiting. Available from: <https://clinicaltrials.gov/ct2/show/record/NCT00477906> [Accessed 11 August 2020].
- 54 Clinicaltrials.gov. Evaluation of Stool Based Markers for the Early Detection of Colorectal Cancers and Adenomas. Trial ID: NCT00843375. 2009. Status: Recruiting. Available from: <https://clinicaltrials.gov/ct2/show/record/NCT00843375> [Accessed 11 August 2020].
- 55 Australian New Zealand Clinical Trials Registry (ANZCTR). Determining the effectiveness of transabdominal electrical stimulation (TES) in the treatment of female adult patients with constipation. Trial ID: ACTRN12614000736640. 2014. Status: Recruiting. Available from: <https://www.anzctr.org.au/Trial/Registration/TrialReview.aspx?id=366633&isReview=true> [Accessed 11 August 2020].
- 56 Clinicaltrials.gov. Dose-ranging Efficacy of Polydextrose Supplement on Colonic Transit Time and Symptoms in Adults With Functional Constipation. Trial ID: NCT02314936. 2014. Status: Completed. Available from: <https://clinicaltrials.gov/ct2/show/record/NCT02314936> [Accessed 11 August 2020].
- 57 Clinicaltrials.gov. Evaluating the Synergism of Soluble Dietary Fiber With Fecal Microbiota Transplantation in Slow Transit Constipation. Trial ID: NCT02291354. 2014. Status: Other. Available from: <https://clinicaltrials.gov/ct2/show/record/NCT02291354> [Accessed 11 August 2020].
- 58 Clinicaltrials.gov. Effect of Fecal Microbiota Transplantation in Slow Transit Constipation (FMTSTC). Trial ID: NCT02301221. 2014. Status: Other. Available from: <https://clinicaltrials.gov/ct2/show/record/NCT02301221> [Accessed 11 August 2020].
- 59 Clinicaltrials.gov. Phase II Study of Subcutaneous Inj. Depot of Octreotide in Patients With Acromegaly and Neuroendocrine Tumours (NETs). Trial ID: NCT02299089. 2014. Status: Completed. Available from: <https://clinicaltrials.gov/ct2/show/record/NCT02299089> [Accessed 11 August 2020].
- 60 Clinicaltrials.gov. Study to Investigate Safety- Pharmacokinetic (PK)- Pharmacodynamic (PD) and Clinical Activity of Trametinib in Subjects With Cancer or Plexiform Neurofibromas and Trametinib in Combination With Dabrafenib in Subjects With Cancers Harboring V600 Mutations. Trial ID: NCT02124772. 2014. Status: Recruiting. Available from: <https://clinicaltrials.gov/ct2/show/record/NCT02124772> [Accessed 11 August 2020].
- 61 Clinicaltrials.gov. A Study to Investigate the Safety and Efficacy of Fidaxomicin (Oral Suspension or Tablets) and Vancomycin (Oral Liquid or Capsules) in Pediatric Subjects With Clostridium Difficile-associated Diarrhea (CDAD) (SUNSHINE). Trial ID: NCT02218372. 2014. Status: Completed. Available from: <https://clinicaltrials.gov/ct2/show/record/NCT02218372> [Accessed 11 August 2020].
- 62 Clinicaltrials.gov. Correlation of Soluble Suppression of Tumorigenicity 2 (ST2) With Golimumab (MK-8259) Response in Participants With Ulcerative Colitis (UC) (MK-8529-022). (EVOLUTION). Trial ID: NCT02318667. 2014. Status: Completed. Available from: <https://clinicaltrials.gov/ct2/show/record/NCT02318667> [Accessed 11 August 2020].
- 63 Clinicaltrials.gov. Fecal Microbial Transplant in Pediatric Crohn's Disease (FMTCD). Trial ID: NCT02272868. 2014. Status: Completed. Available from: <https://clinicaltrials.gov/ct2/show/record/NCT02272868> [Accessed 11 August 2020].
- 64 Clinicaltrials.gov. Ipilimumab and/or Nivolumab in Combination With Temozolomide in Treating Patients With Newly Diagnosed Glioblastoma or Gliosarcoma. Trial ID: NCT02311920. 2014. Status: Active- Not Recruiting. Available from: <https://clinicaltrials.gov/ct2/show/record/NCT02311920> [Accessed 11 August 2020].

- 65 Clinicaltrials.gov. Effects of Health-social Partnership Programme. Trial ID: NCT02286375. 2014. Status: Completed. Available from: <https://clinicaltrials.gov/ct2/show/record/NCT02286375> [Accessed 11 August 2020].
- 66 Clinicaltrials.gov. Pomalidomide in Hereditary Hemorrhagic Telangiectasia and Transfusion-Dependent Vascular Ectasia: a Phase I Study. Trial ID: NCT02287558. 2014. Status: Recruiting. Available from: <https://clinicaltrials.gov/ct2/show/record/NCT02287558> [Accessed 11 August 2020].
- 67 Clinicaltrials.gov. Follow up Study to Assess Long Term Safety and Outcomes in Infants and Children Born to Mothers Participating in Retosiban Treatment Studies (ARIOS). Trial ID: NCT02292784. 2014. Status: Completed. Available from: <https://clinicaltrials.gov/ct2/show/record/NCT02292784> [Accessed 11 August 2020].
- 68 Clinicaltrials.gov. Phase 2 Nab -Paclitaxel (Abraxane ) Plus Gemcitabine in Subjects With Locally Advanced Pancreatic Cancer (LAPC) (LAPACT). Trial ID: NCT02301143. 2014. Status: Completed. Available from: <https://clinicaltrials.gov/ct2/show/record/NCT02301143> [Accessed 11 August 2020].
- 69 Clinicaltrials.gov. Crizotinib in High-Risk Uveal Melanoma Following Definitive Therapy. Trial ID: NCT02223819. 2014. Status: Active- Not Recruiting. Available from: <https://clinicaltrials.gov/ct2/show/record/NCT02223819> [Accessed 11 August 2020].
- 70 Clinicaltrials.gov. Assessment of Anatomic- Physiologic and Biomechanical Characteristics of the Anal Canal and Pelvic Floor. An Observational Pilot Study. Trial ID: NCT02263170. 2014. Status: Completed. Available from: <https://clinicaltrials.gov/ct2/show/record/NCT02263170> [Accessed 11 August 2020].
- 71 EU Clinical Trials Register. SAFETY AND PHARMACOKINETICS OF ODM-204 IN PATIENTS WITH METASTATIC CASTRATION-RESISTANT PROSTATE CANCER (CRPC): OPEN- NONRANDOMISED- UNCONTROLLED- MULTICENTRE- DOSE ESCALATION- FIRST-IN-MAN STUDY WITH A DOSE EXPANSION Ensimmäinen vaiheen turvallisuus- ja imeytymistutkimus ODM-204 valmistella kastroatiohoitoon reagoimattomilla eturauhassyöpöpotilailla: avoimen satunnaisattamaton- kontrollioimaton- nousujohteiseen annoksen nostoon perustuva monikeskus- ja annoslaajennustutkimus; Dualides phase 1/2 study. Trial ID: 2014-003642-26/GB. 2014. Status: Ongoing. Available from: <https://www.clinicaltrialsregister.eu/ctr-search/trial/2014-003642-26/GB> [Accessed 11 August 2020].
- 72 ISRCTN Registry. A randomised controlled trial examining the effectiveness of a STOMA psychosocial intervention programme on the outcomes of colorectal patients with a stoma. Trial ID: ISRCTN41915584. 2014. Status: Completed. Available from: <http://www.isrctn.com/ISRCTN41915584> [Accessed 11 August 2020].
- 73 ISRCTN Registry. Partial prostate Ablation versus Radical prostatectomy. Trial ID: ISRCTN99760303. 2014. Status: Ongoing. Available from: <http://www.isrctn.com/ISRCTN99760303> [Accessed 11 August 2020].
- 74 Australian New Zealand Clinical Trials Registry (ANZCTR). The CRISP (Colorectal cancer RISK Prediction tool) trial: providing personalised advice about bowel cancer screening in primary care.. Trial ID: ACTRN12615000155594. 2015. Status: Completed. Available from: <https://www.anzctr.org.au/Trial/Registration/TrialReview.aspx?id=367846&isReview=true> [Accessed 11 August 2020].
- 75 Australian New Zealand Clinical Trials Registry (ANZCTR). Gut Bugs Trial - Gut microbiome transfer for the treatment of adolescent obesity. Trial ID: ACTRN12615001351505. 2015. Status: Completed. Available from: <https://www.anzctr.org.au/Trial/Registration/TrialReview.aspx?id=369653&isReview=true> [Accessed 11 August 2020].
- 76 Australian New Zealand Clinical Trials Registry (ANZCTR). Influence of habitual dietary fibre intake on the responsiveness of the gut microbiota to a prebiotic. Trial ID: ACTRN12615000922572. 2015. Status: Completed. Available from: <https://www.anzctr.org.au/Trial/Registration/TrialReview.aspx?id=368975&isReview=true> [Accessed 11 August 2020].
- 77 Australian New Zealand Clinical Trials Registry (ANZCTR). Central brain responses of sacral nerve stimulation in patients with faecal incontinence. Trial ID: ACTRN12615001334594. 2015. Status: Active- Not Recruiting. Available from: <https://www.anzctr.org.au/Trial/Registration/TrialReview.aspx?id=368283&isReview=true> [Accessed 11 August 2020].

- 78 Clinical Research Information Service (CRIS). Relationship of food-Specific Serum IgG4 Titers to Common Food Antigens with symptom patterns in Irritable Bowel Syndrome and functional dyspepsia in South Korea. Trial ID: KCT0001774. 2015. Status: Recruiting. Available from: [https://cris.nih.go.kr/cris/en/search/search\\_result\\_st01.jsp?seq=5928](https://cris.nih.go.kr/cris/en/search/search_result_st01.jsp?seq=5928) [Accessed 11 August 2020].
- 79 Clinical Research Information Service (CRIS). Relationship of food-Specific Serum IgG4 Titers with symptom patterns in Inflammatory bowel disease in South Korea. Trial ID: KCT0001779. 2015. Status: Recruiting. Available from: [https://cris.nih.go.kr/cris/en/search/search\\_result\\_st01.jsp?seq=5530](https://cris.nih.go.kr/cris/en/search/search_result_st01.jsp?seq=5530) [Accessed 11 August 2020].
- 80 Clinical Trials Registry - India (CTRI). Effectiveness and Safety of Suns Lubiprostone capsule in treatment of Chronic Idiopathic Constipation. Trial ID: CTRI/2015/11/006358. 2015. Status: Not Available. Available from: <http://ctri.nic.in/Clinicaltrials/pmaindet2.php?trialid=4554> [Accessed 11 August 2020].
- 81 Clinical Trials Registry - India (CTRI). A clinical trial to study the feasibility and safety of Adapted Enhanced Recovery After Surgery Pathway as compared to standard care in patients undergoing simple closure of perforated duodenal ulcer. Trial ID: CTRI/2015/02/005548. 2015. Status: Not Available. Available from: <http://ctri.nic.in/Clinicaltrials/pmaindet2.php?trialid=10762> [Accessed 11 August 2020].
- 82 Clinical Trials Registry - India (CTRI). Comparative Study to assess efficacy and safety of Mycobacterium in Combination with Standard Therapy versus Standard Therapy Alone in treatment of Sepsis. Trial ID: CTRI/2015/07/005961. 2015. Status: Not Available. Available from: <http://ctri.nic.in/Clinicaltrials/pmaindet2.php?trialid=8577> [Accessed 11 August 2020].
- 83 Clinicaltrials.gov. A Safety and Efficacy Evaluation of BLI400 Laxative in Constipated Adults. Trial ID: NCT02481947. 2015. Status: Completed. Available from: <https://clinicaltrials.gov/ct2/show/record/NCT02481947> [Accessed 11 August 2020].
- 84 Clinicaltrials.gov. Study on the Impact of Education Website on the Quality of Outpatient Bowel Preparation for Colonoscopy. Trial ID: NCT02466724. 2015. Status: Completed. Available from: <https://clinicaltrials.gov/ct2/show/record/NCT02466724> [Accessed 11 August 2020].
- 85 Clinicaltrials.gov. Effectiveness of Gum Chewing on Ileus in Chinese Colorectal Patients Underwent Laparoscopic Colorectal Surgery. Trial ID: NCT02419586. 2015. Status: Completed. Available from: <https://clinicaltrials.gov/ct2/show/record/NCT02419586> [Accessed 11 August 2020].
- 86 Clinicaltrials.gov. Natural Orifice Transluminal Endoscopic Surgery for Colorectal Cancer (NOTES). Trial ID: NCT02549456. 2015. Status: Other. Available from: <https://clinicaltrials.gov/ct2/show/record/NCT02549456> [Accessed 11 August 2020].
- 87 Clinicaltrials.gov. Early Diuresis Following Colorectal Surgery. Trial ID: NCT02351934. 2015. Status: Completed. Available from: <https://clinicaltrials.gov/ct2/show/record/NCT02351934> [Accessed 11 August 2020].
- 88 Clinicaltrials.gov. Contribution of Percutaneous Endoscopic Caecostomie in the Management of Severe Constipation Refractory to Medical Treatment (ConstiCAPE). Trial ID: NCT02566746. 2015. Status: Recruiting. Available from: <https://clinicaltrials.gov/ct2/show/record/NCT02566746> [Accessed 11 August 2020].
- 89 Clinicaltrials.gov. An Evaluation of the Effectiveness of a Proprietary Probiotic Blend on Functional Constipation. Trial ID: NCT02418507. 2015. Status: Completed. Available from: <https://clinicaltrials.gov/ct2/show/record/NCT02418507> [Accessed 11 August 2020].
- 90 Clinicaltrials.gov. A Study Investigating the Effect of Digesta-Lac in Healthy Adults With Occasional Constipation. Trial ID: NCT02423564. 2015. Status: Completed. Available from: <https://clinicaltrials.gov/ct2/show/record/NCT02423564> [Accessed 11 August 2020].
- 91 Clinicaltrials.gov. Efficacy and Safety of Fecal Microbiota Transplantation for Slow Transit Constipation. Trial ID: NCT02526849. 2015. Status: Other. Available from: <https://clinicaltrials.gov/ct2/show/record/NCT02526849> [Accessed 11 August 2020].

- 92 Clinicaltrials.gov. Impact of Carbon Dioxide Insufflation and Water Exchange on Post-Colonoscopy Outcomes. Trial ID: NCT02409979. 2015. Status: Completed. Available from: <https://clinicaltrials.gov/ct2/show/record/NCT02409979> [Accessed 11 August 2020].
- 93 Clinicaltrials.gov. Nivolumab and Azacitidine With or Without Ipilimumab in Treating Patients With Refractory/Relapsed or Newly Diagnosed Acute Myeloid Leukemia. Trial ID: NCT02397720. 2015. Status: Recruiting. Available from: <https://clinicaltrials.gov/ct2/show/record/NCT02397720> [Accessed 11 August 2020].
- 94 Clinicaltrials.gov. Effects of Bronchial Segmental Endotoxin Instillation in Humans. Trial ID: NCT02392442. 2015. Status: Recruiting. Available from: <https://clinicaltrials.gov/ct2/show/record/NCT02392442> [Accessed 11 August 2020].
- 95 Clinicaltrials.gov. Long-Term Assessment of Remyelinating Therapy (RENEWED). Trial ID: NCT02657915. 2015. Status: Completed. Available from: <https://clinicaltrials.gov/ct2/show/record/NCT02657915> [Accessed 11 August 2020].
- 96 Clinicaltrials.gov. Therapeutic Use of Tadekinig Alfa in Adult-onset Still's Disease. Trial ID: NCT02398435. 2015. Status: Completed. Available from: <https://clinicaltrials.gov/ct2/show/record/NCT02398435> [Accessed 11 August 2020].
- 97 Clinicaltrials.gov. Ropidoxuridine in Treating Patients With Advanced Gastrointestinal Cancer Undergoing Radiation Therapy. Trial ID: NCT02381561. 2015. Status: Active- Not Recruiting. Available from: <https://clinicaltrials.gov/ct2/show/record/NCT02381561> [Accessed 11 August 2020].
- 98 Clinicaltrials.gov. A Study of PLX8394 as a Single Agent in Patients With Advanced Unresectable Solid Tumors. Trial ID: NCT02428712. 2015. Status: Active- Not Recruiting. Available from: <https://clinicaltrials.gov/ct2/show/record/NCT02428712> [Accessed 11 August 2020].
- 99 Clinicaltrials.gov. Continued Versus Discontinued Oxytocin Stimulation of Labour (CONDISOX). Trial ID: NCT02553226. 2015. Status: Recruiting. Available from: <https://clinicaltrials.gov/ct2/show/record/NCT02553226> [Accessed 11 August 2020].
- 100 Clinicaltrials.gov. Molecular Imaging of Primary Amyloid Cardiomyopathy (MICA). Trial ID: NCT02641145. 2015. Status: Recruiting. Available from: <https://clinicaltrials.gov/ct2/show/record/NCT02641145> [Accessed 11 August 2020].
- 101 Clinicaltrials.gov. Aspiration Treatment of Perianal Abscess. Trial ID: NCT02585141. 2015. Status: Active- Not Recruiting. Available from: <https://clinicaltrials.gov/ct2/show/record/NCT02585141> [Accessed 11 August 2020].
- 102 Clinicaltrials.gov. Endoscopic Treatment of Complex Anal Fistulas (VAAFT). Trial ID: NCT02585167. 2015. Status: Recruiting. Available from: <https://clinicaltrials.gov/ct2/show/record/NCT02585167> [Accessed 11 August 2020].
- 103 Clinicaltrials.gov. A Prospective Evaluation of the Strattice-LIFT to Treat Anal Fistula. Trial ID: NCT02423330. 2015. Status: Other. Available from: <https://clinicaltrials.gov/ct2/show/record/NCT02423330> [Accessed 11 August 2020].
- 104 Clinicaltrials.gov. Long-term Assessment of Safety and Efficacy of BI 695501 in Patients With Rheumatoid Arthritis. Trial ID: NCT02640612. 2015. Status: Completed. Available from: <https://clinicaltrials.gov/ct2/show/record/NCT02640612> [Accessed 11 August 2020].
- 105 Clinicaltrials.gov. 12-Week Study Evaluating the Efficacy- Safety- and Tolerability of Adjunctive Infliximab for Bipolar I/II Depression. Trial ID: NCT02363738. 2015. Status: Other. Available from: <https://clinicaltrials.gov/ct2/show/record/NCT02363738> [Accessed 11 August 2020].
- 106 Clinicaltrials.gov. Comparing Rectus Sheath Catheter to Epidural Post Cystectomy. Trial ID: NCT02572804. 2015. Status: Other. Available from: <https://clinicaltrials.gov/ct2/show/record/NCT02572804> [Accessed 11 August 2020].
- 107 Clinicaltrials.gov. Ibrutinib as an Immune Modulating Agent for Patients With Asymptomatic- High-risk CLL/SLL Risk Chronic Lymphocytic Leukemia or Small Lymphocytic Lymphoma. Trial ID: NCT02518555. 2015. Status: Active- Not Recruiting. Available from: <https://clinicaltrials.gov/ct2/show/record/NCT02518555> [Accessed 11 August 2020].

- 108 Clinicaltrials.gov. Efficacy of 30-day Duration of Fidaxomicin for Recurrent C. Difficile Infection. Trial ID: NCT02395848. 2015. Status: Recruiting. Available from: <https://clinicaltrials.gov/ct2/show/record/NCT02395848> [Accessed 11 August 2020].
- 109 Clinicaltrials.gov. A Prospective Trial of Lyophilized Fecal Microbiota Transplantation for Recurrent Clostridium Difficile Infection. Trial ID: NCT02592343. 2015. Status: Active- Not Recruiting. Available from: <https://clinicaltrials.gov/ct2/show/record/NCT02592343> [Accessed 11 August 2020].
- 110 Clinicaltrials.gov. An Open Label Phase 4 Study to Evaluate Efficacy of Early Versus Late Use of Vedolizumab in Ulcerative Colitis (LOVE-UC). Trial ID: NCT02646657. 2015. Status: Recruiting. Available from: <https://clinicaltrials.gov/ct2/show/record/NCT02646657> [Accessed 11 August 2020].
- 111 Clinicaltrials.gov. Therapeutic Management of Complex Anal Fistulas by Installing a Closure Clip: Multicentre Randomized Controlled Trial (FISCLOSE). Trial ID: NCT02336867. 2015. Status: Other. Available from: <https://clinicaltrials.gov/ct2/show/record/NCT02336867> [Accessed 11 August 2020].
- 112 Clinicaltrials.gov. The Effect of Riboflavin in Crohn's Disease (RISE-UP). Trial ID: NCT02538354. 2015. Status: Other. Available from: <https://clinicaltrials.gov/ct2/show/record/NCT02538354> [Accessed 11 August 2020].
- 113 Clinicaltrials.gov. Acupuncture Treatment for Active Crohn's Disease. Trial ID: NCT02559037. 2015. Status: Completed. Available from: <https://clinicaltrials.gov/ct2/show/record/NCT02559037> [Accessed 11 August 2020].
- 114 Clinicaltrials.gov. Does Clinical Response Correlate With Serum Certolizumab Levels? (APOLLO). Trial ID: NCT02597829. 2015. Status: Other. Available from: <https://clinicaltrials.gov/ct2/show/record/NCT02597829> [Accessed 11 August 2020].
- 115 Clinicaltrials.gov. Study Comparing Rifaximin With Xifaxan 200 mg in Traveler's Diarrhea. Trial ID: NCT02498418. 2015. Status: Completed. Available from: <https://clinicaltrials.gov/ct2/show/record/NCT02498418> [Accessed 11 August 2020].
- 116 Clinicaltrials.gov. Characterization of Resistance Against Live-attenuated Diarrhoeagenic E. Coli (CORAL). Trial ID: NCT02541695. 2015. Status: Completed. Available from: <https://clinicaltrials.gov/ct2/show/record/NCT02541695> [Accessed 11 August 2020].
- 117 Clinicaltrials.gov. Special Drug Use Surveillance of Irribow in Female Patients. Trial ID: NCT02612649. 2015. Status: Completed. Available from: <https://clinicaltrials.gov/ct2/show/record/NCT02612649> [Accessed 11 August 2020].
- 118 Clinicaltrials.gov. Dose Finding Study in Colorectal Cancer Patients Receiving 5-FU-based Chemotherapy to Assess the Efficacy of Elsiglutide in the Prevention of Chemotherapy Induced Diarrhea (CID). Trial ID: NCT02383810. 2015. Status: Completed. Available from: <https://clinicaltrials.gov/ct2/show/record/NCT02383810> [Accessed 11 August 2020].
- 119 Clinicaltrials.gov. Prospective Evaluation of Perineal Ultrasound in Thr Delivery Room to Improve the Diagnosis of OASIS. Trial ID: NCT02615236. 2015. Status: Active- Not Recruiting. Available from: <https://clinicaltrials.gov/ct2/show/record/NCT02615236> [Accessed 11 August 2020].
- 120 Clinicaltrials.gov. Whole-Brain Radiation Therapy With or Without Hippocampal Avoidance in Treating Patients With Limited Stage or Extensive Stage Small Cell Lung Cancer. Trial ID: NCT02635009. 2015. Status: Recruiting. Available from: <https://clinicaltrials.gov/ct2/show/record/NCT02635009> [Accessed 11 August 2020].
- 121 Clinicaltrials.gov. Validation of Two Measures for Growth Hormone Deficiency in Children- the Treatment Related Impact Measure of Childhood Growth Hormone Deficiency (TRIM-CGHD) and the Treatment Burden Measure of Childhood Growth Hormone Deficiency (TB-CGHD). Trial ID: NCT02580032. 2015. Status: Completed. Available from: <https://clinicaltrials.gov/ct2/show/record/NCT02580032> [Accessed 11 August 2020].
- 122 Clinicaltrials.gov. Prospective Randomized Trial About THD Versus Ligasure Hemorrhoidectomy for Grade III and IV Hemorrhoids (THD-LIGA). Trial ID: NCT02654249. 2015. Status: Other. Available from: <https://clinicaltrials.gov/ct2/show/record/NCT02654249> [Accessed 11 August 2020].

- 123 Clinicaltrials.gov. Essentiale Paste in Patients With Gastrointestinal Symptoms in Acute or Chronic Liver Diseases (EPLID). Trial ID: NCT02517385. 2015. Status: Completed. Available from: <https://clinicaltrials.gov/ct2/show/record/NCT02517385> [Accessed 11 August 2020].
- 124 Clinicaltrials.gov. A Study to Assess the Safety of Hep C Vaccine Candidates in HIV Seropositive Individuals. Trial ID: NCT02568332. 2015. Status: Completed. Available from: <https://clinicaltrials.gov/ct2/show/record/NCT02568332> [Accessed 11 August 2020].
- 125 Clinicaltrials.gov. A Study to Evaluate Pharmacokinetic (PK) and Safety of GSK1265744 in Subjects With Hepatic Impairment and Control Healthy Volunteers. Trial ID: NCT02354950. 2015. Status: Completed. Available from: <https://clinicaltrials.gov/ct2/show/record/NCT02354950> [Accessed 11 August 2020].
- 126 Clinicaltrials.gov. Fabulous Fibre Study - Effect of Wheat Bran Extract on Gut and General Health in Healthy Aging Subjects (FFS) (FFS). Trial ID: NCT02693782. 2015. Status: Completed. Available from: <https://clinicaltrials.gov/ct2/show/record/NCT02693782> [Accessed 11 August 2020].
- 127 Clinicaltrials.gov. Efficacy of a Telmisartan/S-Amlodipine on 24-hour BP Control in Hypertensive Patients Inadequately Controlled. Trial ID: NCT02526875. 2015. Status: Other. Available from: <https://clinicaltrials.gov/ct2/show/record/NCT02526875> [Accessed 11 August 2020].
- 128 Clinicaltrials.gov. Biomarkers in Inflammatory Bowel Diseases. Trial ID: NCT02612103. 2015. Status: Completed. Available from: <https://clinicaltrials.gov/ct2/show/record/NCT02612103> [Accessed 11 August 2020].
- 129 Clinicaltrials.gov. A Trial to Determine the Effects of Exercise in Inflammatory Bowel Disease and Rheumatoid Arthritis (ExMET-IBD). Trial ID: NCT02463916. 2015. Status: Other. Available from: <https://clinicaltrials.gov/ct2/show/record/NCT02463916> [Accessed 11 August 2020].
- 130 Clinicaltrials.gov. Moxibustion for Diarrhea-predominant Irritable Bowel Syndrome. Trial ID: NCT02421627. 2015. Status: Completed. Available from: <https://clinicaltrials.gov/ct2/show/record/NCT02421627> [Accessed 11 August 2020].
- 131 Clinicaltrials.gov. Faecal Microbiota Transplantation in Irritable Bowel Syndrome. Trial ID: NCT02423421. 2015. Status: Other. Available from: <https://clinicaltrials.gov/ct2/show/record/NCT02423421> [Accessed 11 August 2020].
- 132 Clinicaltrials.gov. Clinical Trials of N-acetyl Glucosamine Capsule for IBS-D Treatment. Trial ID: NCT02504060. 2015. Status: Other. Available from: <https://clinicaltrials.gov/ct2/show/record/NCT02504060> [Accessed 11 August 2020].
- 133 Clinicaltrials.gov. Colonoscopy-related Pain Predicts the Treatment Response of Amitriptyline in Patients With Irritable Bowel Syndrome. Trial ID: NCT02638870. 2015. Status: Other. Available from: <https://clinicaltrials.gov/ct2/show/record/NCT02638870> [Accessed 11 August 2020].
- 134 Clinicaltrials.gov. Effects of Wheat Breads on Symptoms of IBS- a Pilot Study (Wheat-IBS). Trial ID: NCT02572908. 2015. Status: Completed. Available from: <https://clinicaltrials.gov/ct2/show/record/NCT02572908> [Accessed 11 August 2020].
- 135 Clinicaltrials.gov. The Efficacy of PX0612 In The Treatment Of Irritable Bowel Syndrome. Trial ID: NCT02431533. 2015. Status: Completed. Available from: <https://clinicaltrials.gov/ct2/show/record/NCT02431533> [Accessed 11 August 2020].
- 136 Clinicaltrials.gov. Methoxyamine Hydrochloride- Pemetrexed Disodium- Cisplatin- and Radiation Therapy in Treating Patients With Stage IIIA-IV Non-small Cell Lung Cancer. Trial ID: NCT02535325. 2015. Status: Active- Not Recruiting. Available from: <https://clinicaltrials.gov/ct2/show/record/NCT02535325> [Accessed 11 August 2020].
- 137 Clinicaltrials.gov. Battlefield Acupuncture for the Treatment of Low Back Pain in the Emergency Department. Trial ID: NCT02399969. 2015. Status: Completed. Available from: <https://clinicaltrials.gov/ct2/show/record/NCT02399969> [Accessed 11 August 2020].
- 138 Clinicaltrials.gov. Human Plasma Fatty Acid Oscillations. Trial ID: NCT02502435. 2015. Status: Recruiting. Available from: <https://clinicaltrials.gov/ct2/show/record/NCT02502435> [Accessed 11 August 2020].

- 139 Clinicaltrials.gov. Children s Growth and Behavior Study. Trial ID: NCT02390765. 2015. Status: Recruiting. Available from: <https://clinicaltrials.gov/ct2/show/record/NCT02390765> [Accessed 11 August 2020].
- 140 Clinicaltrials.gov. Osteoarthritis of the Knee- Inflammation- and the Effect of Adalimumab (OKINADA) (OKINADA). Trial ID: NCT02471118. 2015. Status: Recruiting. Available from: <https://clinicaltrials.gov/ct2/show/record/NCT02471118> [Accessed 11 August 2020].
- 141 Clinicaltrials.gov. The Association Between Ovarian Endometrioma and Lower Urinary Tract Symptoms. Trial ID: NCT02623244. 2015. Status: Recruiting. Available from: <https://clinicaltrials.gov/ct2/show/record/NCT02623244> [Accessed 11 August 2020].
- 142 Clinicaltrials.gov. EndoBarrier TM Gastrointestinal Liner Diabetes Trial (EndoBarrier). Trial ID: NCT02459561. 2015. Status: Active- Not Recruiting. Available from: <https://clinicaltrials.gov/ct2/show/record/NCT02459561> [Accessed 11 August 2020].
- 143 Clinicaltrials.gov. Fentanyl Patch Pharmacokinetics in Healthy Adults. Trial ID: NCT02531971. 2015. Status: Completed. Available from: <https://clinicaltrials.gov/ct2/show/record/NCT02531971> [Accessed 11 August 2020].
- 144 Clinicaltrials.gov. Chronic Pelvic Pain in Women - Conservative Group Treatment Compared to Standard Conservative Treatment. (CPP). Trial ID: NCT02356796. 2015. Status: Completed. Available from: <https://clinicaltrials.gov/ct2/show/record/NCT02356796> [Accessed 11 August 2020].
- 145 Clinicaltrials.gov. Prevalence of Small Bowel Polyps in Patients With Sporadic Duodenal Adenomas (SPIDA). Trial ID: NCT02470416. 2015. Status: Active- Not Recruiting. Available from: <https://clinicaltrials.gov/ct2/show/record/NCT02470416> [Accessed 11 August 2020].
- 146 Clinicaltrials.gov. A Study Evaluating the Overall Pain Relief and Safety of Intravenous (IV) CR845 in Patients Undergoing Abdominal Surgery. Trial ID: NCT02542384. 2015. Status: Completed. Available from: <https://clinicaltrials.gov/ct2/show/record/NCT02542384> [Accessed 11 August 2020].
- 147 Clinicaltrials.gov. Bump on the Ball: Impact of a Prenatal Exercise & Education Program on Birth Outcomes & Maternal Quality of Life. Trial ID: NCT02334397. 2015. Status: Completed. Available from: <https://clinicaltrials.gov/ct2/show/record/NCT02334397> [Accessed 11 August 2020].
- 148 Clinicaltrials.gov. Obstetric Perineal Trauma and Physiotherapy. Trial ID: NCT02682212. 2015. Status: Completed. Available from: <https://clinicaltrials.gov/ct2/show/record/NCT02682212> [Accessed 11 August 2020].
- 149 Clinicaltrials.gov. Dose Escalation Study of Preoperative SBRT for High Risk Prostate Cancer. Trial ID: NCT02572284. 2015. Status: Active- Not Recruiting. Available from: <https://clinicaltrials.gov/ct2/show/record/NCT02572284> [Accessed 11 August 2020].
- 150 Clinicaltrials.gov. HDR Brachytherapy vs. LDR Brachytherapy Monotherapy in Localized Prostate Cancer (HDRvsLDR). Trial ID: NCT02628041. 2015. Status: Active- Not Recruiting. Available from: <https://clinicaltrials.gov/ct2/show/record/NCT02628041> [Accessed 11 August 2020].
- 151 Clinicaltrials.gov. Transplantoux Health Evaluation Study (THES). Trial ID: NCT02533245. 2015. Status: Other. Available from: <https://clinicaltrials.gov/ct2/show/record/NCT02533245> [Accessed 11 August 2020].
- 152 Clinicaltrials.gov. A Phase 1 Study of the EZH2 Inhibitor Tazemetostat in Pediatric Subjects With Relapsed or Refractory INI1-Negative Tumors or Synovial Sarcoma. Trial ID: NCT02601937. 2015. Status: Recruiting. Available from: <https://clinicaltrials.gov/ct2/show/record/NCT02601937> [Accessed 11 August 2020].
- 153 Clinicaltrials.gov. NeuroRegen Scaffold With Stem Cells for Chronic Spinal Cord Injury Repair. Trial ID: NCT02352077. 2015. Status: Invitation. Available from: <https://clinicaltrials.gov/ct2/show/record/NCT02352077> [Accessed 11 August 2020].
- 154 Clinicaltrials.gov. Spinal Cord Injury Epidural Stimulation. Trial ID: NCT02592668. 2015. Status: Active- Not Recruiting. Available from: <https://clinicaltrials.gov/ct2/show/record/NCT02592668> [Accessed 11 August 2020].

- 155 Clinicaltrials.gov. Post-Approval 'Real Conditions of Use' Study (PAS003). Trial ID: NCT02555280. 2015. Status: Recruiting. Available from: <https://clinicaltrials.gov/ct2/show/record/NCT02555280> [Accessed 11 August 2020].
- 156 Clinicaltrials.gov. Cognitive Impact of Pomegranate Polyphenols Following Ischemic Stroke. Trial ID: NCT02442804. 2015. Status: Completed. Available from: <https://clinicaltrials.gov/ct2/show/record/NCT02442804> [Accessed 11 August 2020].
- 157 Clinicaltrials.gov. The Bowel CLEAnsing: A National Initiative (B-CLEAN). Trial ID: NCT02547571. 2015. Status: Completed. Available from: <https://clinicaltrials.gov/ct2/show/record/NCT02547571> [Accessed 11 August 2020].
- 158 Clinicaltrials.gov. A Study of AZD2014 in Combination With Selumetinib in Patients With Advanced Cancers (TORCMEK). Trial ID: NCT02583542. 2015. Status: Active- Not Recruiting. Available from: <https://clinicaltrials.gov/ct2/show/record/NCT02583542> [Accessed 11 August 2020].
- 159 Clinicaltrials.gov. Pre-Marketing Feasibility Evaluation of the UriCap-RM - Urine Collection in Hospitalized Male Patients. Trial ID: NCT02529371. 2015. Status: Other. Available from: <https://clinicaltrials.gov/ct2/show/record/NCT02529371> [Accessed 11 August 2020].
- 160 Clinicaltrials.gov. Feasibility of the UriCap-F for Urine Collection in Hospitalized Women. Trial ID: NCT02530372. 2015. Status: Other. Available from: <https://clinicaltrials.gov/ct2/show/record/NCT02530372> [Accessed 11 August 2020].
- 161 Clinicaltrials.gov. Diagnosing Bacterial Vaginosis/Vaginitis (BV) Using the Gynecologene Test Method (SAGE). Trial ID: NCT02558179. 2015. Status: Other. Available from: <https://clinicaltrials.gov/ct2/show/record/NCT02558179> [Accessed 11 August 2020].
- 162 Clinicaltrials.gov. Apical Suspension Repair for Vault Prolapse In a Three-Arm Randomized Trial Design (ASPIRe). Trial ID: NCT02676973. 2015. Status: Active- Not Recruiting. Available from: <https://clinicaltrials.gov/ct2/show/record/NCT02676973> [Accessed 11 August 2020].
- 163 Clinicaltrials.gov. Diet and Stool Metabolites in Fecal Incontinence. Trial ID: NCT02485522. 2015. Status: Completed. Available from: <https://clinicaltrials.gov/ct2/show/record/NCT02485522> [Accessed 11 August 2020].
- 164 EU Clinical Trials Register. Multicentre- Randomised- Placebo-Controlled Trial of Mebeverine in Children with Irritable Bowel Syndrome (IBS) or Functional Abdominal Pain - not otherwise specified (FAP-NOS); Duski. Trial ID: 2015-003293-32/NL. 2015. Status: Ongoing. Available from: <https://www.clinicaltrialsregister.eu/ctr-search/trial/2015-003293-32/NL> [Accessed 11 August 2020].
- 165 EU Clinical Trials Register. Intravenous iron- early functional recovery and delirium in patients atients with hip fracture Hierro intravenoso- recuperaci n funcional precoz y delirium en pacientes con fractura de cadera. Trial ID: 2014-001923-53/ES. 2015. Status: Ongoing. Available from: <https://www.clinicaltrialsregister.eu/ctr-search/trial/2014-001923-53/ES> [Accessed 11 August 2020].
- 166 EU Clinical Trials Register. A Multicenter- Open-Label Study of Sebelipase Alfa in Patients with Lysosomal Acid Lipase Deficiency. Trial ID: 2011-004287-30/NL. 2015. Status: Completed. Available from: <https://www.clinicaltrialsregister.eu/ctr-search/trial/2011-004287-30/NL> [Accessed 11 August 2020].
- 167 EU Clinical Trials Register. CONDISOX: Continued versus discontinued oxytocin stimulation of labour in a double-blind randomised controlled trial. Trial ID: 2015-002942-30/DK. 2015. Status: Ongoing. Available from: <https://www.clinicaltrialsregister.eu/ctr-search/trial/2015-002942-30/DK> [Accessed 11 August 2020].
- 168 EU Clinical Trials Register. Sandostatin (Octreotide LAR) may lead to clinical improvement through receptor occupation optimisation. A prospective interventional trial of patients with neuro-endocrine tumors with carcinoid syndrome receiving octreotide LAR.; SCIROCCO. Trial ID: 2014-003856-30/BE. 2015. Status: Completed. Available from: <https://www.clinicaltrialsregister.eu/ctr-search/trial/2014-003856-30/BE> [Accessed 11 August 2020].

- 169 EU Clinical Trials Register. A Randomised Active-Controlled Double-Blind and Open Label Extension Study to Evaluate the Efficacy-Long-term Safety and Tolerability of TP05 3.2 g/day for the Treatment of Active Ulcerative Colitis (UC). Trial ID: 2013-000366-11/RO. 2015. Status: Ongoing. Available from: <https://www.clinicaltrialsregister.eu/ctr-search/trial/2013-000366-11/RO> [Accessed 11 August 2020].
- 170 ISRCTN Registry. Primary care based text-reminders in colorectal cancer screening. Trial ID: ISRCTN70904476. 2015. Status: Completed. Available from: <http://www.isrctn.com/ISRCTN70904476> [Accessed 11 August 2020].
- 171 ISRCTN Registry. Effect of a probiotic blend on bloating and colonic transit time in participants with self-reported bloating and constipation. Trial ID: ISRCTN41607808. 2015. Status: Completed. Available from: <http://www.isrctn.com/ISRCTN41607808> [Accessed 11 August 2020].
- 172 ISRCTN Registry. Investigation of continence- sexual- and bowel function after radical surgery for bladder cancer. Trial ID: ISRCTN42949068. 2015. Status: Recruiting. Available from: <http://www.isrctn.com/ISRCTN42949068> [Accessed 11 August 2020].
- 173 ISRCTN Registry. CapaCITY study 1-chronic constipation treatment pathway. Trial ID: ISRCTN11791740. 2015. Status: Ongoing. Available from: <http://www.isrctn.com/ISRCTN11791740> [Accessed 11 August 2020].
- 174 ISRCTN Registry. Dietary interventions in irritable bowel syndrome. Trial ID: ISRCTN16562415. 2015. Status: Completed. Available from: <http://www.isrctn.com/ISRCTN16562415> [Accessed 11 August 2020].
- 175 ISRCTN Registry. Are gut hormone changes the reason why the long-limb gastric bypass is more effective than the standard limb gastric bypass in improving type 2 diabetes mellitus? Trial ID: ISRCTN15283219. 2015. Status: Completed. Available from: <http://www.isrctn.com/ISRCTN15283219> [Accessed 11 August 2020].
- 176 ISRCTN Registry. Feasibility of a guided workbook intervention for cancer patients. Trial ID: ISRCTN56342476. 2015. Status: Completed. Available from: <http://www.isrctn.com/ISRCTN56342476> [Accessed 11 August 2020].
- 177 Thai Clinical Trials Registry (TCTR). The benefit of an anal purse-string suture to decrease contamination during vaginal surgery: a prospective- randomized controlled trial. Trial ID: TCTR20151211001. 2015. Status: Invitation. Available from: <http://www.clinicaltrials.in.th/index.php?tp=regtrials&menu=trialssearch&smenu=fulltext&task=search&task2=view1&id=1650> [Accessed 11 August 2020].
- 178 UMIN Clinical Trials Registry (UMIN-CTR). Preventive effect of the Lactobacillus brevis KB290 and beta-carotene to IBS-D-like symptoms. Trial ID: UMIN000018002. 2015. Status: Completed. Available from: [https://upload.umin.ac.jp/cgi-open-bin/ctr\\_e/ctr\\_view.cgi?recptno=R000020752](https://upload.umin.ac.jp/cgi-open-bin/ctr_e/ctr_view.cgi?recptno=R000020752) [Accessed 11 August 2020].
- 179 UMIN Clinical Trials Registry (UMIN-CTR). Study to evaluate the effectiveness of health advice to prevent preterm birth and improve quality of life. Trial ID: UMIN000016853. 2015. Status: Active- Not Recruiting. Available from: [https://upload.umin.ac.jp/cgi-open-bin/ctr\\_e/ctr\\_view.cgi?recptno=R000018211](https://upload.umin.ac.jp/cgi-open-bin/ctr_e/ctr_view.cgi?recptno=R000018211) [Accessed 11 August 2020].
- 180 Australian New Zealand Clinical Trials Registry (ANZCTR). Improving uptake of colorectal cancer screening among primary care attendees. Trial ID: ACTRN12616001299493. 2016. Status: Completed. Available from: <https://www.anzctr.org.au/Trial/Registration/TrialReview.aspx?id=371136&isReview=true> [Accessed 11 August 2020].
- 181 Australian New Zealand Clinical Trials Registry (ANZCTR). The CRISP trial: a risk assessment tool to inform bowel cancer screening in general practice patients. Trial ID: ACTRN12616001573448. 2016. Status: Active- Not Recruiting. Available from: <https://www.anzctr.org.au/Trial/Registration/TrialReview.aspx?id=371743&isReview=true> [Accessed 11 August 2020].
- 182 Australian New Zealand Clinical Trials Registry (ANZCTR). The IMPACT of preoperative immunonutrition in patients undergoing surgery for colorectal cancer. Trial ID: ACTRN12616001621404p. 2016. Status: Not Yet Recruiting. Available from: <https://www.anzctr.org.au/Trial/Registration/TrialReview.aspx?id=371874&isReview=true> [Accessed 11 August 2020].

- 183 Australian New Zealand Clinical Trials Registry (ANZCTR). Randomised controlled trial comparing cutting seton vs ligation of intersphincteric fistula tract (LIFT) for complex anal fistula. Trial ID: ACTRN12616001258448. 2016. Status: Recruiting. Available from: <https://www.anzctr.org.au/Trial/Registration/TrialReview.aspx?id=368792&isReview=true> [Accessed 11 August 2020].
- 184 Australian New Zealand Clinical Trials Registry (ANZCTR). The Act-F Trial: Does active follow-up of invitation lead to higher participation in bowel screening by Maori- Pacific and Asians? Trial ID: ACTRN12616001487404. 2016. Status: Completed. Available from: <https://www.anzctr.org.au/Trial/Registration/TrialReview.aspx?id=371688&isReview=true> [Accessed 11 August 2020].
- 185 Australian New Zealand Clinical Trials Registry (ANZCTR). Thioguanine Suppositories For Proctitis. Trial ID: ACTRN12616000602426. 2016. Status: Not Yet Recruiting. Available from: <https://www.anzctr.org.au/Trial/Registration/TrialReview.aspx?id=370532&isReview=true> [Accessed 11 August 2020].
- 186 Australian New Zealand Clinical Trials Registry (ANZCTR). Comparison of the mini sling or retropubic sling in the treatment of women with severe (Intrinsic Sphincter Deficiency -ISD) stress urinary incontinence (SUI). Trial ID: ACTRN12616000328471. 2016. Status: Recruiting. Available from: <https://www.anzctr.org.au/Trial/Registration/TrialReview.aspx?id=370229&isReview=true> [Accessed 11 August 2020].
- 187 Australian New Zealand Clinical Trials Registry (ANZCTR). Pelvic floor assessment in post-partum women. Trial ID: ACTRN12616000290493. 2016. Status: Completed. Available from: <https://www.anzctr.org.au/Trial/Registration/TrialReview.aspx?id=370212&isReview=true> [Accessed 11 August 2020].
- 188 Clinical Research Information Service (CRIS). The effects of bowel preparation education by using an informative Short Message Service. Trial ID: KCT0002184. 2016. Status: Recruiting. Available from: [https://cris.nih.go.kr/cris/en/search/search\\_result\\_st01.jsp?seq=6906](https://cris.nih.go.kr/cris/en/search/search_result_st01.jsp?seq=6906) [Accessed 11 August 2020].
- 189 Clinicaltrials.gov. Use of Gastrografin in the Management of Fecal Impaction in Patients With Severe Chronic Constipation. Trial ID: NCT02784093. 2016. Status: Other. Available from: <https://clinicaltrials.gov/ct2/show/record/NCT02784093> [Accessed 11 August 2020].
- 190 Clinicaltrials.gov. A Safety and Efficacy Study of a Bowel Cleansing Preparation (BLI800) in Pediatric Subjects Undergoing Colonoscopy. Trial ID: NCT02819323. 2016. Status: Completed. Available from: <https://clinicaltrials.gov/ct2/show/record/NCT02819323> [Accessed 11 August 2020].
- 191 Clinicaltrials.gov. A Novel Robotic System for Single Port and Natural Orifice Transluminal Endoscopic Surgery. Trial ID: NCT03010813. 2016. Status: Completed. Available from: <https://clinicaltrials.gov/ct2/show/record/NCT03010813> [Accessed 11 August 2020].
- 192 Clinicaltrials.gov. Impact of Tunneling During Minimally Invasive Sacrocolpopexy. Trial ID: NCT02856217. 2016. Status: Completed. Available from: <https://clinicaltrials.gov/ct2/show/record/NCT02856217> [Accessed 11 August 2020].
- 193 Clinicaltrials.gov. Rectal Sparing Approach After Preoperative Radio and/or Chemotherapy in Patients With Rectal Cancer (ReSARCh). Trial ID: NCT02710812. 2016. Status: Recruiting. Available from: <https://clinicaltrials.gov/ct2/show/record/NCT02710812> [Accessed 11 August 2020].
- 194 Clinicaltrials.gov. Freeze-dried vs Fresh Fecal Microbiota Transplantation in Patients With Slow Transit Constipation. Trial ID: NCT02676388. 2016. Status: Other. Available from: <https://clinicaltrials.gov/ct2/show/record/NCT02676388> [Accessed 11 August 2020].
- 195 Clinicaltrials.gov. Using 16S rRNA Gene Sequencing Analysis Intestinal Microbiota in Constipation Patients. Trial ID: NCT02984969. 2016. Status: Other. Available from: <https://clinicaltrials.gov/ct2/show/record/NCT02984969> [Accessed 11 August 2020].

- 196 Clinicaltrials.gov. Efficacy and Safety in a Randomised Acute Pain Study of MR308 (Tramadol/Celecoxib). (STARDOM1). Trial ID: NCT02982161. 2016. Status: Completed. Available from: <https://clinicaltrials.gov/ct2/show/record/NCT02982161> [Accessed 11 August 2020].
- 197 Clinicaltrials.gov. Effect of Pioglitazone Administered to Patients With Adrenomyeloneuropathy (XAMNPIOP2011). Trial ID: NCT03864523. 2016. Status: Completed. Available from: <https://clinicaltrials.gov/ct2/show/record/NCT03864523> [Accessed 11 August 2020].
- 198 Clinicaltrials.gov. First-in-human Study of Oral TP-0903 (a Novel Inhibitor of AXL Kinase) in Patients With Advanced Solid Tumors. Trial ID: NCT02729298. 2016. Status: Recruiting. Available from: <https://clinicaltrials.gov/ct2/show/record/NCT02729298> [Accessed 11 August 2020].
- 199 Clinicaltrials.gov. Memantine and Comprehensive- Individualized- Patient Centered Management of Alzheimer's Disease: Health Outcome. Trial ID: NCT02854917. 2016. Status: Completed. Available from: <https://clinicaltrials.gov/ct2/show/record/NCT02854917> [Accessed 11 August 2020].
- 200 Clinicaltrials.gov. Integrating Behavioral Health and Primary Care for Comorbid Behavioral and Medical Problems (IBHPC). Trial ID: NCT02868983. 2016. Status: Invitation. Available from: <https://clinicaltrials.gov/ct2/show/record/NCT02868983> [Accessed 11 August 2020].
- 201 Clinicaltrials.gov. Effects of a Orally Inhaled Fluticasone Furoate on Growth Velocity in Prepubertal- Paediatric Subjects With Asthma Over a Year. Trial ID: NCT02889809. 2016. Status: Active- Not Recruiting. Available from: <https://clinicaltrials.gov/ct2/show/record/NCT02889809> [Accessed 11 August 2020].
- 202 Clinicaltrials.gov. Fesoterodine for Amelioration of Autonomic Dysreflexia (AD) Following Spinal Cord Injury (SCI). Trial ID: NCT02676154. 2016. Status: Completed. Available from: <https://clinicaltrials.gov/ct2/show/record/NCT02676154> [Accessed 11 August 2020].
- 203 Clinicaltrials.gov. Change in Reward System Activation and Gut Microbiota Following RYGB and Sleeve Gastrectomy for Weight Loss vs. Control-Heads Up Ancillary. Trial ID: NCT02735564. 2016. Status: Completed. Available from: <https://clinicaltrials.gov/ct2/show/record/NCT02735564> [Accessed 11 August 2020].
- 204 Clinicaltrials.gov. A Trial Assessing Post-Operative Use of ProSpare- a Rectal Obturator in Prostate Cancer Radiotherapy (POPS). Trial ID: NCT02978014. 2016. Status: Recruiting. Available from: <https://clinicaltrials.gov/ct2/show/record/NCT02978014> [Accessed 11 August 2020].
- 205 Clinicaltrials.gov. Epidural Analgesia Use in Pancreatic Resections (E-PRO I). Trial ID: NCT02681796. 2016. Status: Completed. Available from: <https://clinicaltrials.gov/ct2/show/record/NCT02681796> [Accessed 11 August 2020].
- 206 Clinicaltrials.gov. Patient Safety Learning Laboratory: Making Acute Care More Patient-Centered (PSLL). Trial ID: NCT02969343. 2016. Status: Completed. Available from: <https://clinicaltrials.gov/ct2/show/record/NCT02969343> [Accessed 11 August 2020].
- 207 Clinicaltrials.gov. A Controlled Clinical Study of Dupilumab in Patients With Bilateral Nasal Polyps (SINUS-24). Trial ID: NCT02912468. 2016. Status: Completed. Available from: <https://clinicaltrials.gov/ct2/show/record/NCT02912468> [Accessed 11 August 2020].
- 208 Clinicaltrials.gov. Microbiota or Placebo After Antimicrobial Therapy for Recurrent *C. Difficile* at Home (MATCH) (MATCH). Trial ID: NCT03005379. 2016. Status: Recruiting. Available from: <https://clinicaltrials.gov/ct2/show/record/NCT03005379> [Accessed 11 August 2020].
- 209 Clinicaltrials.gov. Effect of Naloxegol on Gastric- Small Bowel- and Colonic Transit in Healthy Subjects. Trial ID: NCT02737059. 2016. Status: Completed. Available from: <https://clinicaltrials.gov/ct2/show/record/NCT02737059> [Accessed 11 August 2020].
- 210 Clinicaltrials.gov. Reclassifying Constipation Using Imaging and Manometry (RECLAIM). Trial ID: NCT03226145. 2016. Status: Recruiting. Available from: <https://clinicaltrials.gov/ct2/show/record/NCT03226145> [Accessed 11 August 2020].

- 211 Clinicaltrials.gov. COmparison of MicroBiota AccordIng to Age in Crohn's Disease (COMeBACK) (COMeBACK). Trial ID: NCT02839317. 2016. Status: Recruiting. Available from: <https://clinicaltrials.gov/ct2/show/record/NCT02839317> [Accessed 11 August 2020].
- 212 Clinicaltrials.gov. Description of Perianal Lesions in a Cohort of Crohn's Disease Patients (LAPCROHN). Trial ID: NCT02899013. 2016. Status: Completed. Available from: <https://clinicaltrials.gov/ct2/show/record/NCT02899013> [Accessed 11 August 2020].
- 213 Clinicaltrials.gov. Urinary and Anorectal Functional Disorders and Their Impact on CF Adults (PerineoMucRMO) (PerineoMuco). Trial ID: NCT02894619. 2016. Status: Completed. Available from: <https://clinicaltrials.gov/ct2/show/record/NCT02894619> [Accessed 11 August 2020].
- 214 Clinicaltrials.gov. Dynamics of Inflammation and Its Blockade on Motivational Circuitry in Depression. Trial ID: NCT03006393. 2016. Status: Recruiting. Available from: <https://clinicaltrials.gov/ct2/show/record/NCT03006393> [Accessed 11 August 2020].
- 215 Clinicaltrials.gov. Retrospective Study of IBS-D Patients Previously Receiving SBI. Trial ID: NCT02661425. 2016. Status: Completed. Available from: <https://clinicaltrials.gov/ct2/show/record/NCT02661425> [Accessed 11 August 2020].
- 216 Clinicaltrials.gov. Fiber and Water Improve Bowel Habit in Humans. Trial ID: NCT02838849. 2016. Status: Completed. Available from: <https://clinicaltrials.gov/ct2/show/record/NCT02838849> [Accessed 11 August 2020].
- 217 Clinicaltrials.gov. Open-Label- Multi-Center- Two-Part- Ph1 Study to Characterize the PKs of an Intravenous Micro-Dose of [14C]-Tazemetostat (EPZ 6438) and the ADME of an Oral [14C]-Labeled Dose of Tazemetostat in Subjects With B-Cell Lymphomas or Adv Solid Tumors. Trial ID: NCT03010982. 2016. Status: Completed. Available from: <https://clinicaltrials.gov/ct2/show/record/NCT03010982> [Accessed 11 August 2020].
- 218 Clinicaltrials.gov. Fulvestrant or Aromatase Inhibitor and Palbociclib in Treating Older Patients With Hormone Responsive Breast Cancer That Cannot Be Removed by Surgery. Trial ID: NCT02760030. 2016. Status: Recruiting. Available from: <https://clinicaltrials.gov/ct2/show/record/NCT02760030> [Accessed 11 August 2020].
- 219 Clinicaltrials.gov. Pembrolizumab- Bevacizumab- and Cyclophosphamide in Treating Patients With Recurrent Ovarian- Fallopian Tube- or Primary Peritoneal Cancer. Trial ID: NCT02853318. 2016. Status: Active- Not Recruiting. Available from: <https://clinicaltrials.gov/ct2/show/record/NCT02853318> [Accessed 11 August 2020].
- 220 Clinicaltrials.gov. Fatigue Management in Quiescent IBD. Trial ID: NCT02709434. 2016. Status: Other. Available from: <https://clinicaltrials.gov/ct2/show/record/NCT02709434> [Accessed 11 August 2020].
- 221 Clinicaltrials.gov. Comparison of Microbiota and Quality of Life for a Low FODMAPs and Standard Dietary in Irritable Bowel Syndrome Patients. Trial ID: NCT02902926. 2016. Status: Other. Available from: <https://clinicaltrials.gov/ct2/show/record/NCT02902926> [Accessed 11 August 2020].
- 222 Clinicaltrials.gov. Safety of 250ml Preoperative Carbohydrate Drink in Gastric Cancer Patients. Trial ID: NCT02815150. 2016. Status: Completed. Available from: <https://clinicaltrials.gov/ct2/show/record/NCT02815150> [Accessed 11 August 2020].
- 223 Clinicaltrials.gov. Geriatric-CO-mAnagement for Cardiology Patients in the Hospital (G-COACH). Trial ID: NCT02890927. 2016. Status: Completed. Available from: <https://clinicaltrials.gov/ct2/show/record/NCT02890927> [Accessed 11 August 2020].
- 224 Clinicaltrials.gov. Trial of Panobinostat in Children With Diffuse Intrinsic Pontine Glioma (PBTC-047). Trial ID: NCT02717455. 2016. Status: Recruiting. Available from: <https://clinicaltrials.gov/ct2/show/record/NCT02717455> [Accessed 11 August 2020].
- 225 Clinicaltrials.gov. Determining Lipid Content in Stool After Alpha-cyclodextrin (FMAT). Trial ID: NCT03002168. 2016. Status: Completed. Available from: <https://clinicaltrials.gov/ct2/show/record/NCT03002168> [Accessed 11 August 2020].
- 226 Clinicaltrials.gov. FBCx (Alpha-CD) Mechanism of Action Trial (FMAT). Trial ID: NCT02999620. 2016. Status: Completed. Available from: <https://clinicaltrials.gov/ct2/show/record/NCT02999620> [Accessed 11 August 2020].

- 227 Clinicaltrials.gov. The Role of Gut Microbiota in Heart Failure and Pre-Heart Failure With Preserved Ejection Fraction. Trial ID: NCT02728154. 2016. Status: Recruiting. Available from: <https://clinicaltrials.gov/ct2/show/record/NCT02728154> [Accessed 11 August 2020].
- 228 Clinicaltrials.gov. HET Bipolar System: Validation of Outpatient Hemorrhoid Treatment (HET). Trial ID: NCT02773420. 2016. Status: Other. Available from: <https://clinicaltrials.gov/ct2/show/record/NCT02773420> [Accessed 11 August 2020].
- 229 Clinicaltrials.gov. Effects of the Probiotic Visbiome Extra Strength on Gut Microbiome & Immune Activation Markers. Trial ID: NCT02706717. 2016. Status: Completed. Available from: <https://clinicaltrials.gov/ct2/show/record/NCT02706717> [Accessed 11 August 2020].
- 230 Clinicaltrials.gov. Optimization of a Tenofovir Enema for HIV Prevention (DREAM-01). Trial ID: NCT02750540. 2016. Status: Completed. Available from: <https://clinicaltrials.gov/ct2/show/record/NCT02750540> [Accessed 11 August 2020].
- 231 Clinicaltrials.gov. Fecal Metabolome and the Intestinal Microbiota in Irritable Bowel Syndrome (IBS). Trial ID: NCT02981888. 2016. Status: Recruiting. Available from: <https://clinicaltrials.gov/ct2/show/record/NCT02981888> [Accessed 11 August 2020].
- 232 Clinicaltrials.gov. A Study to Evaluate LB1148 for Return of Gastrointestinal Function and Adhesions in Subjects Undergoing Bowel Resection (PROFILE). Trial ID: NCT02836470. 2016. Status: Recruiting. Available from: <https://clinicaltrials.gov/ct2/show/record/NCT02836470> [Accessed 11 August 2020].
- 233 Clinicaltrials.gov. A Study on the Effectiveness of a Nutritional Supplement With Natural Mastiha in Inflammatory Bowel Diseases. Trial ID: NCT02796339. 2016. Status: Active- Not Recruiting. Available from: <https://clinicaltrials.gov/ct2/show/record/NCT02796339> [Accessed 11 August 2020].
- 234 Clinicaltrials.gov. Non-interventional Study of Moderate to Severe Inflammatory Bowel Disease in Brazil. Trial ID: NCT02822235. 2016. Status: Completed. Available from: <https://clinicaltrials.gov/ct2/show/record/NCT02822235> [Accessed 11 August 2020].
- 235 Clinicaltrials.gov. Gut Microbiota Reconstruction in the Treatment of Irritable Bowel Syndrome With Predominant Diarrhea. Trial ID: NCT02651740. 2016. Status: Recruiting. Available from: <https://clinicaltrials.gov/ct2/show/record/NCT02651740> [Accessed 11 August 2020].
- 236 Clinicaltrials.gov. Effect of Fecal Microbiota Transplantation in Irritable Bowel Syndrome. Trial ID: NCT02788071. 2016. Status: Completed. Available from: <https://clinicaltrials.gov/ct2/show/record/NCT02788071> [Accessed 11 August 2020].
- 237 Clinicaltrials.gov. Peppermint Oil for the Treatment of Irritable Bowel Syndrome: Optimizing Therapeutic Strategies Using Targeted Delivery (PERSUADE). Trial ID: NCT02716285. 2016. Status: Completed. Available from: <https://clinicaltrials.gov/ct2/show/record/NCT02716285> [Accessed 11 August 2020].
- 238 Clinicaltrials.gov. Efficacy of Eluxadoline in the Treatment of Irritable Bowel Syndrome With Diarrhea in Patients With Inadequate Control of Symptoms With Prior Loperamide Use. Trial ID: NCT02959983. 2016. Status: Completed. Available from: <https://clinicaltrials.gov/ct2/show/record/NCT02959983> [Accessed 11 August 2020].
- 239 Clinicaltrials.gov. Risk Factors for Incontinence-Associated Dermatitis (IAD) in ICU Patients Suffering From Fecal Incontinence. Trial ID: NCT02996357. 2016. Status: Completed. Available from: <https://clinicaltrials.gov/ct2/show/record/NCT02996357> [Accessed 11 August 2020].
- 240 Clinicaltrials.gov. Impact of Remote Ischemic Postconditioning on Autonomic Function in Stroke Patients (IRAS). Trial ID: NCT02777099. 2016. Status: Other. Available from: <https://clinicaltrials.gov/ct2/show/record/NCT02777099> [Accessed 11 August 2020].
- 241 Clinicaltrials.gov. Fast-track Surgery After Gynecological Oncology Surgery. Trial ID: NCT02687412. 2016. Status: Completed. Available from: <https://clinicaltrials.gov/ct2/show/record/NCT02687412> [Accessed 11 August 2020].

- 242 Clinicaltrials.gov. Zanubrutinib (BGB-3111) in Combination With Tislelizumab (BGB-A317) in Participants With B-cell Malignancies. Trial ID: NCT02795182. 2016. Status: Active- Not Recruiting. Available from: <https://clinicaltrials.gov/ct2/show/record/NCT02795182> [Accessed 11 August 2020].
- 243 Clinicaltrials.gov. Optimising Antibiotic Treatment for Sick Malnourished Children (FLACSAM-PK). Trial ID: NCT02746276. 2016. Status: Other. Available from: <https://clinicaltrials.gov/ct2/show/record/NCT02746276> [Accessed 11 August 2020].
- 244 Clinicaltrials.gov. Pembrolizumab in Treating Patients With Small Bowel Adenocarcinoma That is Metastatic or Locally Advanced and Cannot Be Removed by Surgery. Trial ID: NCT02949219. 2016. Status: Active- Not Recruiting. Available from: <https://clinicaltrials.gov/ct2/show/record/NCT02949219> [Accessed 11 August 2020].
- 245 Clinicaltrials.gov. Metastatic Tumor Research and Outcomes Network (MTRON). Trial ID: NCT02830451. 2016. Status: Recruiting. Available from: <https://clinicaltrials.gov/ct2/show/record/NCT02830451> [Accessed 11 August 2020].
- 246 Clinicaltrials.gov. Developing Rectal USPE Measures for Suppositories (Project DRUM-S) (DRUM-S). Trial ID: NCT02744261. 2016. Status: Active- Not Recruiting. Available from: <https://clinicaltrials.gov/ct2/show/record/NCT02744261> [Accessed 11 August 2020].
- 247 Clinicaltrials.gov. Older Person's Exercise and Nutrition Study (OPEN). Trial ID: NCT02702037. 2016. Status: Completed. Available from: <https://clinicaltrials.gov/ct2/show/record/NCT02702037> [Accessed 11 August 2020].
- 248 Clinicaltrials.gov. Investigating Indirect Mechanism of Neuroprotection of Tecfidera (Dimethyl Fumarate) in RRMS and Progressive Patients. Trial ID: NCT03092544. 2016. Status: Other. Available from: <https://clinicaltrials.gov/ct2/show/record/NCT03092544> [Accessed 11 August 2020].
- 249 Clinicaltrials.gov. A Trial of CV301 in Combination With Anti-PD-1 Therapy in Subjects With Non-Small Cell Lung Cancer. Trial ID: NCT02840994. 2016. Status: Completed. Available from: <https://clinicaltrials.gov/ct2/show/record/NCT02840994> [Accessed 11 August 2020].
- 250 Clinicaltrials.gov. Nivolumab and Ipilimumab in Treating Patients With Rare Tumors. Trial ID: NCT02834013. 2016. Status: Recruiting. Available from: <https://clinicaltrials.gov/ct2/show/record/NCT02834013> [Accessed 11 August 2020].
- 251 Clinicaltrials.gov. Defining the Role of the Gut Microbiome in Mediating the Effects of Obesity on Intestinal Stem Cells. Trial ID: NCT02863029. 2016. Status: Active- Not Recruiting. Available from: <https://clinicaltrials.gov/ct2/show/record/NCT02863029> [Accessed 11 August 2020].
- 252 Clinicaltrials.gov. Obstetric and Proctology Support of Patients With Perineums Suits. Trial ID: NCT02823717. 2016. Status: Active- Not Recruiting. Available from: <https://clinicaltrials.gov/ct2/show/record/NCT02823717> [Accessed 11 August 2020].
- 253 Clinicaltrials.gov. Shifting Rehabilitation Paradigms in Skilled Nursing Facilities. Trial ID: NCT02927171. 2016. Status: Completed. Available from: <https://clinicaltrials.gov/ct2/show/record/NCT02927171> [Accessed 11 August 2020].
- 254 Clinicaltrials.gov. Efficacy Assessment of the Cell Therapy Medicine NC1 in Patients With Post-traumatic Syringomyelia (CME-LEM4). Trial ID: NCT02807142. 2016. Status: Completed. Available from: <https://clinicaltrials.gov/ct2/show/record/NCT02807142> [Accessed 11 August 2020].
- 255 Clinicaltrials.gov. Nutritional Impact of Serum-Derived Bovine Immunoglobulin Protein Isolate in Subjects With IPAA. Trial ID: NCT02828410. 2016. Status: Completed. Available from: <https://clinicaltrials.gov/ct2/show/record/NCT02828410> [Accessed 11 August 2020].
- 256 Clinicaltrials.gov. Pivotal Study of MRI-guided Transurethral Ultrasound Ablation in Patients With Localized Prostate Cancer. Trial ID: NCT02766543. 2016. Status: Active- Not Recruiting. Available from: <https://clinicaltrials.gov/ct2/show/record/NCT02766543> [Accessed 11 August 2020].

- 257 Clinicaltrials.gov. NBTXR3 Nanoparticles and EBRT or EBRT With Brachytherapy in the Treatment of Prostate Adenocarcinoma. Trial ID: NCT02805894. 2016. Status: Recruiting. Available from: <https://clinicaltrials.gov/ct2/show/record/NCT02805894> [Accessed 11 August 2020].
- 258 Clinicaltrials.gov. Atezolizumab in Treating Patients With Recurrent BCG-Unresponsive Non-muscle Invasive Bladder Cancer. Trial ID: NCT02844816. 2016. Status: Active- Not Recruiting. Available from: <https://clinicaltrials.gov/ct2/show/record/NCT02844816> [Accessed 11 August 2020].
- 259 Clinicaltrials.gov. A Study of Efficacy and Safety of M2951 in Subjects With Relapsing Multiple Sclerosis. Trial ID: NCT02975349. 2016. Status: Active- Not Recruiting. Available from: <https://clinicaltrials.gov/ct2/show/record/NCT02975349> [Accessed 11 August 2020].
- 260 Clinicaltrials.gov. RSV-MVA-BN Vaccine Phase II Trial in 55 Year Old Adults. Trial ID: NCT02873286. 2016. Status: Completed. Available from: <https://clinicaltrials.gov/ct2/show/record/NCT02873286> [Accessed 11 August 2020].
- 261 Clinicaltrials.gov. A Study to Assess the Safety- Tolerability- and Pharmacokinetics of ASP5094 Following Multiple Intravenous Doses in Subjects With Rheumatoid Arthritis on Methotrexate. Trial ID: NCT02698657. 2016. Status: Completed. Available from: <https://clinicaltrials.gov/ct2/show/record/NCT02698657> [Accessed 11 August 2020].
- 262 Clinicaltrials.gov. Investigating Typhoid Fever Pathogenesis (TYGER). Trial ID: NCT03067961. 2016. Status: Active- Not Recruiting. Available from: <https://clinicaltrials.gov/ct2/show/record/NCT03067961> [Accessed 11 August 2020].
- 263 Clinicaltrials.gov. A Study to Evaluate the Efficacy and Safety of SEP-363856 in Acutely Psychotic Adults With Schizophrenia. Trial ID: NCT02969382. 2016. Status: Completed. Available from: <https://clinicaltrials.gov/ct2/show/record/NCT02969382> [Accessed 11 August 2020].
- 264 Clinicaltrials.gov. Short Bowel Syndrome Research Study for Children Up To 17 Years of Age on Parenteral Nutrition. Trial ID: NCT02682381. 2016. Status: Completed. Available from: <https://clinicaltrials.gov/ct2/show/record/NCT02682381> [Accessed 11 August 2020].
- 265 Clinicaltrials.gov. Study in Japanese Pediatric Subjects With Short Bowel Syndrome (SBS) Who Are Dependent on Parenteral Support. Trial ID: NCT02980666. 2016. Status: Completed. Available from: <https://clinicaltrials.gov/ct2/show/record/NCT02980666> [Accessed 11 August 2020].
- 266 Clinicaltrials.gov. Gait Pattern Analysis and Feasibility of Gait Training With a Walking Assist Robot in Stroke Patients and Elderly Adults. Trial ID: NCT02843828. 2016. Status: Completed. Available from: <https://clinicaltrials.gov/ct2/show/record/NCT02843828> [Accessed 11 August 2020].
- 267 Clinicaltrials.gov. Clinical and Biological Characterization of Patients and Collection of Samples (THE-RNA). Trial ID: NCT04499040. 2016. Status: Not Yet Recruiting. Available from: <https://clinicaltrials.gov/ct2/show/record/NCT04499040> [Accessed 11 August 2020].
- 268 Clinicaltrials.gov. TD-1473 for Active Ulcerative Colitis (UC). Trial ID: NCT02818686. 2016. Status: Completed. Available from: <https://clinicaltrials.gov/ct2/show/record/NCT02818686> [Accessed 11 August 2020].
- 269 Clinicaltrials.gov. A Study to Evaluate the Safety and Efficacy of Upadacitinib (ABT-494) for Induction and Maintenance Therapy in Subjects With Moderately to Severely Active Ulcerative Colitis (UC). Trial ID: NCT02819635. 2016. Status: Recruiting. Available from: <https://clinicaltrials.gov/ct2/show/record/NCT02819635> [Accessed 11 August 2020].
- 270 Clinicaltrials.gov. A Study to Evaluate the Long-Term Safety and Efficacy of Upadacitinib (ABT-494) in Subjects With Ulcerative Colitis (UC). Trial ID: NCT03006068. 2016. Status: Invitation. Available from: <https://clinicaltrials.gov/ct2/show/record/NCT03006068> [Accessed 11 August 2020].

- 271 Clinicaltrials.gov. Evaluation of the Fast Fill Technique for Anal Acoustic Reflectometry (AAR) in the Incontinent Anal Sphincter. Trial ID: NCT02782364. 2016. Status: Other. Available from: <https://clinicaltrials.gov/ct2/show/record/NCT02782364> [Accessed 11 August 2020].
- 272 Clinicaltrials.gov. First Time Mothers and Anal Incontinence Six Years Postpartum (FITMAI6). Trial ID: NCT02792244. 2016. Status: Completed. Available from: <https://clinicaltrials.gov/ct2/show/record/NCT02792244> [Accessed 11 August 2020].
- 273 Clinicaltrials.gov. LIBERATE - PRO: Eclipse System Registry (LIBERATEPRO). Trial ID: NCT03028636. 2016. Status: Completed. Available from: <https://clinicaltrials.gov/ct2/show/record/NCT03028636> [Accessed 11 August 2020].
- 274 Clinicaltrials.gov. Long Term Efficacy of Sacral Nerve Modulation (SNM) in Patients With Constipation or Stool Incontinence. Trial ID: NCT02836717. 2016. Status: Completed. Available from: <https://clinicaltrials.gov/ct2/show/record/NCT02836717> [Accessed 11 August 2020].
- 275 EU Clinical Trials Register. A Phase 3- Randomized- Double-Blind- Double-Dummy- Multicenter- Prospective Study to Assess the Efficacy and Safety of Eravacycline Compared with Meropenem in Complicated Intra-abdominal Infections 3 - - - -; IGNITE4. Trial ID: 2016-002208-21/BG. 2016. Status: Completed. Available from: <https://www.clinicaltrialsregister.eu/ctr-search/trial/2016-002208-21/BG> [Accessed 11 August 2020].
- 276 EU Clinical Trials Register. A 24-Week Double-blind- Safety- Efficacy- and Pharmacodynamic Study Investigating Two Doses of Teduglutide in Pediatric Subjects Through 17 Years of Age with Short Bowel Syndrome who are Dependent on Parenteral Support latest PIP agreement P/0137/2015. Trial ID: 2015-002252-27/GB. 2016. Status: Completed. Available from: <https://www.clinicaltrialsregister.eu/ctr-search/trial/2015-002252-27/GB> [Accessed 11 August 2020].
- 277 EU Clinical Trials Register. A Phase 2a- Randomized- Double-Blind- Placebo Controlled- Parallel-Group Study to Evaluate the Efficacy and Safety of AMG 714 in Adult Patients with Type II Refractory Celiac Disease- an In Situ Small Bowel T Cell Lymphoma. Satunnaistettu- sokkoutettu ja lumekontrolloitu I ketutkimus- jossa tutkitaan AMG714 -tutkimusl kkeen tehoa ja turvallisuutta ruokavaliohoitoon reagoimattomassa aikuisten refraktaarikeliakiataudissa- johon liittyy ohutsuolen T-solulymfooman riski. Trial ID: 2015-004063-36/FI. 2016. Status: Completed. Available from: <https://www.clinicaltrialsregister.eu/ctr-search/trial/2015-004063-36/FI> [Accessed 11 August 2020].
- 278 ISRCTN Registry. Enterosgel in treatment of acute diarrhoea in adults. Trial ID: ISRCTN20758708. 2016. Status: Completed. Available from: <http://www.isrctn.com/ISRCTN20758708> [Accessed 11 August 2020].
- 279 ISRCTN Registry. Nutritional support algorithm for critically ill patients. Trial ID: ISRCTN10583582. 2016. Status: Completed. Available from: <http://www.isrctn.com/ISRCTN10583582> [Accessed 11 August 2020].
- 280 ISRCTN Registry. Understanding the role of potassium on hydration and fluid balance. Trial ID: ISRCTN50989296. 2016. Status: Completed. Available from: <http://www.isrctn.com/ISRCTN50989296> [Accessed 11 August 2020].
- 281 ISRCTN Registry. Continuous TAP blocks for major gynaecological surgery. Trial ID: ISRCTN60295543. 2016. Status: Completed. Available from: <http://www.isrctn.com/ISRCTN60295543> [Accessed 11 August 2020].
- 282 ISRCTN Registry. Effectiveness of 'home-but not alone' mobile-health application on parental outcomes. Trial ID: ISRCTN99092313. 2016. Status: Completed. Available from: <http://www.isrctn.com/ISRCTN99092313> [Accessed 11 August 2020].
- 283 ISRCTN Registry. Dietary Interventions in inflammatory bowel disease (IBD). Trial ID: ISRCTN17061468. 2016. Status: Completed. Available from: <http://www.isrctn.com/ISRCTN17061468> [Accessed 11 August 2020].
- 284 ISRCTN Registry. LaCeS Feasibility: Laparoscopic versus open colorectal surgery in the acute setting. Trial ID: ISRCTN15681041. 2016. Status: Completed. Available from: <http://www.isrctn.com/ISRCTN15681041> [Accessed 11 August 2020].
- 285 UMIN Clinical Trials Registry (UMIN-CTR). A prospective multicenter clinical research of transanal irrigation in patients with faecal incontinence or chronic constipation resistant to conservative bowel management. Trial ID: UMIN000024950. 2016. Status:

- Completed. Available from: [https://upload.umin.ac.jp/cgi-open-bin/ctr\\_e/ctr\\_view.cgi?recptno=R000028600](https://upload.umin.ac.jp/cgi-open-bin/ctr_e/ctr_view.cgi?recptno=R000028600) [Accessed 11 August 2020].
- 286 Australian New Zealand Clinical Trials Registry (ANZCTR). Surveying the health of women associated with Universal Medicine. Trial ID: ACTRN12617000972325. 2017. Status: Completed. Available from: <https://www.anzctr.org.au/Trial/Registration/TrialReview.aspx?id=373120&isReview=true> [Accessed 11 August 2020].
- 287 Australian New Zealand Clinical Trials Registry (ANZCTR). Teleconsulting versus normal consulting in the care of inflammatory bowel disease in rural Southern District Health Board patients. Trial ID: ACTRN12617000389303. 2017. Status: Recruiting. Available from: <https://www.anzctr.org.au/Trial/Registration/TrialReview.aspx?id=372543&isReview=true> [Accessed 11 August 2020].
- 288 Australian New Zealand Clinical Trials Registry (ANZCTR). IBDmindfulness-mindfulness for youth with Inflammatory Bowel Disease (IBD) and depression trial. Trial ID: ACTRN12617000876392. 2017. Status: Recruiting. Available from: <https://www.anzctr.org.au/Trial/Registration/TrialReview.aspx?id=373115&isReview=true> [Accessed 11 August 2020].
- 289 Australian New Zealand Clinical Trials Registry (ANZCTR). Effectiveness of oral Solifenacin versus minimally invasive surgery in treatment of urge incontinence. Trial ID: ACTRN12617000284369. 2017. Status: Recruiting. Available from: <https://www.anzctr.org.au/Trial/Registration/TrialReview.aspx?id=372076&isReview=true> [Accessed 11 August 2020].
- 290 Australian New Zealand Clinical Trials Registry (ANZCTR). Can an increase in consumption of dietary fibre improve gut flora profile- bowel habit and sense of wellbeing in healthy adults? Trial ID: ACTRN12617000205336. 2017. Status: Completed. Available from: <https://www.anzctr.org.au/Trial/Registration/TrialReview.aspx?id=372124&isReview=true> [Accessed 11 August 2020].
- 291 Australian New Zealand Clinical Trials Registry (ANZCTR). A Unique Approach to Exercise in Patients with Inflammatory Bowel Disease - A Pilot Study. Trial ID: ACTRN12617000526370. 2017. Status: Active- Not Recruiting. Available from: <https://www.anzctr.org.au/Trial/Registration/TrialReview.aspx?id=372707&isReview=true> [Accessed 11 August 2020].
- 292 Australian New Zealand Clinical Trials Registry (ANZCTR). Personalised pelvic floor Muscle Training for Urinary incontinence after Prostatectomy. Trial ID: ACTRN12617000788370. 2017. Status: Recruiting. Available from: <https://www.anzctr.org.au/Trial/Registration/TrialReview.aspx?id=372360&isReview=true> [Accessed 11 August 2020].
- 293 Australian New Zealand Clinical Trials Registry (ANZCTR). Pelvic Floor Muscle Exercise Training in Prostatectomy Patients. Trial ID: ACTRN12617001400358. 2017. Status: Completed. Available from: <https://www.anzctr.org.au/Trial/Registration/TrialReview.aspx?id=373697&isReview=true> [Accessed 11 August 2020].
- 294 Australian New Zealand Clinical Trials Registry (ANZCTR). Virtual chromoendoscopy vs standard dye-based chromoendoscopy in Inflammatory Bowel Disease (IBD) surveillance. Trial ID: ACTRN12617000390381p. 2017. Status: Not Yet Recruiting. Available from: <https://www.anzctr.org.au/Trial/Registration/TrialReview.aspx?id=372568&isReview=true> [Accessed 11 August 2020].
- 295 Australian New Zealand Clinical Trials Registry (ANZCTR). Effects of lateral episiotomy on the function of pelvic floor and sexual function after vaginal delivery in primiparas. Trial ID: ACTRN12617000437369. 2017. Status: Completed. Available from: <https://www.anzctr.org.au/Trial/Registration/TrialReview.aspx?id=371894&isReview=true> [Accessed 11 August 2020].
- 296 Clinical Trials Registry - India (CTRI). A comparative study of UBLAC vs placebo to evaluate its safety and efficacy in children between 4-12 (Both inclusive). Trial ID: CTRI/2017/02/007810. 2017. Status: Not Available. Available from: <http://ctri.nic.in/Clinicaltrials/pmaindet2.php?trialid=14302> [Accessed 11 August 2020].
- 297 Clinical Trials Registry - India (CTRI). Clinical evaluation of Ayurvedic formulation in the Management of parikartika (Fissure in Ano). Trial ID: CTRI/2017/06/008773. 2017. Status: Not Available. Available from: <http://ctri.nic.in/Clinicaltrials/pmaindet2.php?trialid=16565> [Accessed 11 August 2020].

- 298 Clinical Trials Registry - India (CTRI). cricoid pressure (pressure in front of neck to prevent soiling of lungs from the contents of the stomach) and videolaryngoscopy (equipment used to facilitate tube passage inside the windpipe). Trial ID: CTRI/2017/12/010960. 2017. Status: Not Available. Available from: <http://ctri.nic.in/Clinicaltrials/pmaindet2.php?trialid=20093> [Accessed 11 August 2020].
- 299 Clinicaltrials.gov. Safety Study of BMX-001 (Radio-protector) in Patients With Newly Diagnosed Anal Cancer. Trial ID: NCT03386500. 2017. Status: Recruiting. Available from: <https://clinicaltrials.gov/ct2/show/record/NCT03386500> [Accessed 11 August 2020].
- 300 Clinicaltrials.gov. Assessment of the Predictive Value of the Acetic Acid Test in Surgery Condition for the Detection of Dysplastic Lesions in Patients With Anal Condylomatosis. Trial ID: NCT03126123. 2017. Status: Completed. Available from: <https://clinicaltrials.gov/ct2/show/record/NCT03126123> [Accessed 11 August 2020].
- 301 Clinicaltrials.gov. Effects of High-Intensity Focused Ultrasound (HIFU) Treatment on Fecal Continence and Anorretal Fisiology. Trial ID: NCT03289221. 2017. Status: Completed. Available from: <https://clinicaltrials.gov/ct2/show/record/NCT03289221> [Accessed 11 August 2020].
- 302 Clinicaltrials.gov. Laparoscopically Assisted Anorectal Pull-through Versus Posterior Sagittal Anorectoplasty. Trial ID: NCT03174028. 2017. Status: Other. Available from: <https://clinicaltrials.gov/ct2/show/record/NCT03174028> [Accessed 11 August 2020].
- 303 Clinicaltrials.gov. Safety and Efficacy of Low-volume Preparation in the Elderly: Oral Sulfate Solution. Trial ID: NCT03112967. 2017. Status: Completed. Available from: <https://clinicaltrials.gov/ct2/show/record/NCT03112967> [Accessed 11 August 2020].
- 304 Clinicaltrials.gov. Chromoendoscopy in Inflammatory Bowel Disease. Trial ID: NCT03250780. 2017. Status: Recruiting. Available from: <https://clinicaltrials.gov/ct2/show/record/NCT03250780> [Accessed 11 August 2020].
- 305 Clinicaltrials.gov. Effect of Weight Reduction on Constipation (constipation). Trial ID: NCT03106857. 2017. Status: Completed. Available from: <https://clinicaltrials.gov/ct2/show/record/NCT03106857> [Accessed 11 August 2020].
- 306 Clinicaltrials.gov. Study of Durvalumab (MEDI4736) After Chemo-Radiation for Microsatellite Stable Stage II-IV Rectal Cancer. Trial ID: NCT03102047. 2017. Status: Recruiting. Available from: <https://clinicaltrials.gov/ct2/show/record/NCT03102047> [Accessed 11 August 2020].
- 307 Clinicaltrials.gov. Transanal Total Mesorectal Excision for Rectal Cancer on Anal Physiology + Fecal Incontinence. Trial ID: NCT03283540. 2017. Status: Recruiting. Available from: <https://clinicaltrials.gov/ct2/show/record/NCT03283540> [Accessed 11 August 2020].
- 308 Clinicaltrials.gov. Multicenter Phase II Study of Transanal TME (taTME). Trial ID: NCT03144765. 2017. Status: Recruiting. Available from: <https://clinicaltrials.gov/ct2/show/record/NCT03144765> [Accessed 11 August 2020].
- 309 Clinicaltrials.gov. ESD Versus TAMIS for Early Rectal Neoplasms. Trial ID: NCT03217773. 2017. Status: Recruiting. Available from: <https://clinicaltrials.gov/ct2/show/record/NCT03217773> [Accessed 11 August 2020].
- 310 Clinicaltrials.gov. Alternative to Intensive Management of the Active Phase of the Second Stage of Labor (PASST). Trial ID: NCT03018860. 2017. Status: Recruiting. Available from: <https://clinicaltrials.gov/ct2/show/record/NCT03018860> [Accessed 11 August 2020].
- 311 Clinicaltrials.gov. Impact of Traditional Chinese Medicine on the Gut Microbiota-dependent Trimethylamine N-oxide (TCM-TMAO). Trial ID: NCT03186625. 2017. Status: Other. Available from: <https://clinicaltrials.gov/ct2/show/record/NCT03186625> [Accessed 11 August 2020].
- 312 Clinicaltrials.gov. DC/AML Fusion Cell Vaccine vs Observation in Patients Who Achieve a Chemotherapy-induced Remission. Trial ID: NCT03059485. 2017. Status: Recruiting. Available from: <https://clinicaltrials.gov/ct2/show/record/NCT03059485> [Accessed 11 August 2020].

- 313 Clinicaltrials.gov. Efficacy and Safety in a Randomised Acute Pain Study of MR308: STARDOM2. (STARDOM2). Trial ID: NCT03062644. 2017. Status: Completed. Available from: <https://clinicaltrials.gov/ct2/show/record/NCT03062644> [Accessed 11 August 2020].
- 314 Clinicaltrials.gov. Dietary Carbohydrate and Internal Body Fat (CARBFUNC). Trial ID: NCT03401970. 2017. Status: Active- Not Recruiting. Available from: <https://clinicaltrials.gov/ct2/show/record/NCT03401970> [Accessed 11 August 2020].
- 315 Clinicaltrials.gov. Alpelisib and Enzalutamide in Treating Patients With Androgen Receptor and PTEN Positive Metastatic Breast Cancer. Trial ID: NCT03207529. 2017. Status: Recruiting. Available from: <https://clinicaltrials.gov/ct2/show/record/NCT03207529> [Accessed 11 August 2020].
- 316 Clinicaltrials.gov. Exploring Gut-Brain and Brain-Gut Interactions in Alcohol Use Disorder Via Microbiota Investigations: A Pilot Study. Trial ID: NCT03152760. 2017. Status: Recruiting. Available from: <https://clinicaltrials.gov/ct2/show/record/NCT03152760> [Accessed 11 August 2020].
- 317 Clinicaltrials.gov. LIFT Technique Versus Seton in Management of Anal Fistula. Trial ID: NCT03311035. 2017. Status: Other. Available from: <https://clinicaltrials.gov/ct2/show/record/NCT03311035> [Accessed 11 August 2020].
- 318 Clinicaltrials.gov. Trametinib in Combination With Paclitaxel in the Treatment of Anaplastic Thyroid Cancer. Trial ID: NCT03085056. 2017. Status: Recruiting. Available from: <https://clinicaltrials.gov/ct2/show/record/NCT03085056> [Accessed 11 August 2020].
- 319 Clinicaltrials.gov. Ano-genital Human Papillomavirus (HPV) Infection- Precancerous Lesions and Genital Warts Among Danish Renal Transplant Recipients. Trial ID: NCT03018327. 2017. Status: Completed. Available from: <https://clinicaltrials.gov/ct2/show/record/NCT03018327> [Accessed 11 August 2020].
- 320 Clinicaltrials.gov. Per-operative Ultrasonographic Assessment of the Placement of the Mesh in Laparoscopic Sacral Colpo/Hysteropexy (SONOMESH). Trial ID: NCT03410303. 2017. Status: Recruiting. Available from: <https://clinicaltrials.gov/ct2/show/record/NCT03410303> [Accessed 11 August 2020].
- 321 Clinicaltrials.gov. Evaluation of SAR440340 and as Combination Therapy With Dupilumab in Moderate-to-Severe Asthma Patients. Trial ID: NCT03387852. 2017. Status: Completed. Available from: <https://clinicaltrials.gov/ct2/show/record/NCT03387852> [Accessed 11 August 2020].
- 322 Clinicaltrials.gov. Intravenous Lidocaine for Post-Operative Pain Control in Patients Undergoing Bariatric Bowel Surgery. Trial ID: NCT03095404. 2017. Status: Not Yet Recruiting. Available from: <https://clinicaltrials.gov/ct2/show/record/NCT03095404> [Accessed 11 August 2020].
- 323 Clinicaltrials.gov. Ibrutinib in Preventing Acute Leukemia in Patients After Reduced-Intensity Conditioning and Stem Cell Transplant. Trial ID: NCT03267186. 2017. Status: Recruiting. Available from: <https://clinicaltrials.gov/ct2/show/record/NCT03267186> [Accessed 11 August 2020].
- 324 Clinicaltrials.gov. A Study of GDC-9545 Alone or in Combination With Palbociclib and/or Luteinizing Hormone-Releasing Hormone (LHRH) Agonist in Locally Advanced or Metastatic Estrogen Receptor-Positive Breast Cancer. Trial ID: NCT03332797. 2017. Status: Recruiting. Available from: <https://clinicaltrials.gov/ct2/show/record/NCT03332797> [Accessed 11 August 2020].
- 325 Clinicaltrials.gov. Epidemiology and Pathophysiology of Post-Infectious Functional GI Disorders. Trial ID: NCT03266068. 2017. Status: Active- Not Recruiting. Available from: <https://clinicaltrials.gov/ct2/show/record/NCT03266068> [Accessed 11 August 2020].
- 326 Clinicaltrials.gov. Highly Conformal- Hypofractionated- Focally Dose Escalated Post-Prostatectomy Radiotherapy. Trial ID: NCT03388619. 2017. Status: Recruiting. Available from: <https://clinicaltrials.gov/ct2/show/record/NCT03388619> [Accessed 11 August 2020].

- 327 Clinicaltrials.gov. The Effect of Probiotics on Chronic Kidney Disease. Trial ID: NCT03228563. 2017. Status: Recruiting. Available from: <https://clinicaltrials.gov/ct2/show/record/NCT03228563> [Accessed 11 August 2020].
- 328 Clinicaltrials.gov. Targin for Chronic Pain Management in Patients With Spinal Cord Injury. Trial ID: NCT03179475. 2017. Status: Recruiting. Available from: <https://clinicaltrials.gov/ct2/show/record/NCT03179475> [Accessed 11 August 2020].
- 329 Clinicaltrials.gov. Transverse Colostomy for Refractory Hemorrhagic Chronic Radiation Proctitis: a Prospective Cohort Study. Trial ID: NCT03397901. 2017. Status: Recruiting. Available from: <https://clinicaltrials.gov/ct2/show/record/NCT03397901> [Accessed 11 August 2020].
- 330 Clinicaltrials.gov. Novel Tracer Methods to Evaluate Muscle Protein Metabolism in Cirrhosis. Trial ID: NCT03225677. 2017. Status: Recruiting. Available from: <https://clinicaltrials.gov/ct2/show/record/NCT03225677> [Accessed 11 August 2020].
- 331 Clinicaltrials.gov. A Study of BGB-A317 as Monotherapy in Relapsed or Refractory Classical Hodgkin Lymphoma. Trial ID: NCT03209973. 2017. Status: Active- Not Recruiting. Available from: <https://clinicaltrials.gov/ct2/show/record/NCT03209973> [Accessed 11 August 2020].
- 332 Clinicaltrials.gov. Radiation Therapy With Durvalumab or Cetuximab in Treating Patients With Locoregionally Advanced Head and Neck Cancer Who Cannot Take Cisplatin. Trial ID: NCT03258554. 2017. Status: Recruiting. Available from: <https://clinicaltrials.gov/ct2/show/record/NCT03258554> [Accessed 11 August 2020].
- 333 Clinicaltrials.gov. ObeSity Related Colorectal Adenoma Risk (OSCAR). Trial ID: NCT03663062. 2017. Status: Recruiting. Available from: <https://clinicaltrials.gov/ct2/show/record/NCT03663062> [Accessed 11 August 2020].
- 334 Clinicaltrials.gov. Multicenter Study to Describe the Performance of the AOS-C2001-B Device in Patients With Colostomy. Trial ID: NCT03108105. 2017. Status: Completed. Available from: <https://clinicaltrials.gov/ct2/show/record/NCT03108105> [Accessed 11 August 2020].
- 335 Clinicaltrials.gov. The Effect of CSP01 on Chronic Idiopathic Constipation and Irritable Bowel Syndrome With Constipation. Trial ID: NCT03054506. 2017. Status: Completed. Available from: <https://clinicaltrials.gov/ct2/show/record/NCT03054506> [Accessed 11 August 2020].
- 336 Clinicaltrials.gov. Early MRI Prediction of Crohns. Trial ID: NCT03340519. 2017. Status: Recruiting. Available from: <https://clinicaltrials.gov/ct2/show/record/NCT03340519> [Accessed 11 August 2020].
- 337 Clinicaltrials.gov. The Biologic Onset of Crohn's Disease: A Screening Study in First Degree Relatives. Trial ID: NCT03291743. 2017. Status: Recruiting. Available from: <https://clinicaltrials.gov/ct2/show/record/NCT03291743> [Accessed 11 August 2020].
- 338 Clinicaltrials.gov. PARCT: Trial of Atezolizumab in Relapsed/Refractory Cutaneous T Cell Lymphoma (CTCL) (PARCT). Trial ID: NCT03357224. 2017. Status: Recruiting. Available from: <https://clinicaltrials.gov/ct2/show/record/NCT03357224> [Accessed 11 August 2020].
- 339 Clinicaltrials.gov. The Role of Oral Glutathione on Growth Parameters in Children With Cystic Fibrosis (GROW). Trial ID: NCT03020719. 2017. Status: Completed. Available from: <https://clinicaltrials.gov/ct2/show/record/NCT03020719> [Accessed 11 August 2020].
- 340 Clinicaltrials.gov. The Influence of Glycemic Control and Obesity on Energy Balance and Metabolic Flexibility in Type 1 Diabetes (ACME). Trial ID: NCT03379792. 2017. Status: Recruiting. Available from: <https://clinicaltrials.gov/ct2/show/record/NCT03379792> [Accessed 11 August 2020].
- 341 Clinicaltrials.gov. Rifamycin SV-MMX 600 mg Tablets Administered Three or Two Times Daily to Patients With IBS-D. Trial ID: NCT03099785. 2017. Status: Recruiting. Available from: <https://clinicaltrials.gov/ct2/show/record/NCT03099785> [Accessed 11 August 2020].

- 342 Clinicaltrials.gov. CIPA Phase 1 ECG Biomarker Validation Study. Trial ID: NCT03070470. 2017. Status: Completed. Available from: <https://clinicaltrials.gov/ct2/show/record/NCT03070470> [Accessed 11 August 2020].
- 343 Clinicaltrials.gov. Fractional CO2 Laser Therapy Versus 4% Topical Lidocaine Gel for Dyspareunia in Breast Cancer Survivors (BCLS). Trial ID: NCT03257670. 2017. Status: Other. Available from: <https://clinicaltrials.gov/ct2/show/record/NCT03257670> [Accessed 11 August 2020].
- 344 Clinicaltrials.gov. Trial on Impact on the Hospital Stay- of an Early Oral Nutrition Protocol Applied to Patients After Total Gastrectomy. (DOPGT ). Trial ID: NCT03257280. 2017. Status: Recruiting. Available from: <https://clinicaltrials.gov/ct2/show/record/NCT03257280> [Accessed 11 August 2020].
- 345 Clinicaltrials.gov. Trametinib in Treating Patients With Epithelioid Hemangioendothelioma That Is Metastatic- Locally Advanced- or Cannot Be Removed by Surgery. Trial ID: NCT03148275. 2017. Status: Recruiting. Available from: <https://clinicaltrials.gov/ct2/show/record/NCT03148275> [Accessed 11 August 2020].
- 346 Clinicaltrials.gov. Fertility and Ovarian Reserve Function in the Patient With Inflammatory Bowel Disease. Trial ID: NCT03269916. 2017. Status: Other. Available from: <https://clinicaltrials.gov/ct2/show/record/NCT03269916> [Accessed 11 August 2020].
- 347 Clinicaltrials.gov. Lifestyle Intervention in Preparation for Pregnancy (LIPP). Trial ID: NCT03146156. 2017. Status: Recruiting. Available from: <https://clinicaltrials.gov/ct2/show/record/NCT03146156> [Accessed 11 August 2020].
- 348 Clinicaltrials.gov. Treatment of Anal Fistula With Lasercoagulation. Trial ID: NCT03017898. 2017. Status: Recruiting. Available from: <https://clinicaltrials.gov/ct2/show/record/NCT03017898> [Accessed 11 August 2020].
- 349 Clinicaltrials.gov. a Study to Investigate the Efficacy- and Safety of the Colovac Colorectal Anastomosis Protection Device. (SAFE-1). Trial ID: NCT03352570. 2017. Status: Completed. Available from: <https://clinicaltrials.gov/ct2/show/record/NCT03352570> [Accessed 11 August 2020].
- 350 Clinicaltrials.gov. Laser Interstitial Thermotherapy (LITT) Combined With Checkpoint Inhibitor for Recurrent GBM (RGBM). Trial ID: NCT03277638. 2017. Status: Recruiting. Available from: <https://clinicaltrials.gov/ct2/show/record/NCT03277638> [Accessed 11 August 2020].
- 351 Clinicaltrials.gov. HIIH Versus HMC: Randomized Clinical Trial (HIIHxHMC). Trial ID: NCT03293056. 2017. Status: Recruiting. Available from: <https://clinicaltrials.gov/ct2/show/record/NCT03293056> [Accessed 11 August 2020].
- 352 Clinicaltrials.gov. Efficacy of B7A BSIgG Against E. Coli Strain B7A Challenge. Trial ID: NCT03040687. 2017. Status: Completed. Available from: <https://clinicaltrials.gov/ct2/show/record/NCT03040687> [Accessed 11 August 2020].
- 353 Clinicaltrials.gov. Multicenter Prospective Trial on Hemorrhoids. Trial ID: NCT03245086. 2017. Status: Other. Available from: <https://clinicaltrials.gov/ct2/show/record/NCT03245086> [Accessed 11 August 2020].
- 354 Clinicaltrials.gov. Korean Cancer Study Group: Translational biomarker Driven Umbrella Project for Head and Neck (TRIUMPH)- Esophageal Squamous Cell Carcinoma- Part 1 (HNSCC)]. Trial ID: NCT03292250. 2017. Status: Recruiting. Available from: <https://clinicaltrials.gov/ct2/show/record/NCT03292250> [Accessed 11 August 2020].
- 355 Clinicaltrials.gov. Velphoro and Impact on the Oral Cavity and Gut Microbiome (MicrobiomEisen). Trial ID: NCT03409757. 2017. Status: Recruiting. Available from: <https://clinicaltrials.gov/ct2/show/record/NCT03409757> [Accessed 11 August 2020].
- 356 Clinicaltrials.gov. Autonomic and Cytokines Profiles of Patients With Ulcerative Proctitis. Trial ID: NCT03259659. 2017. Status: Recruiting. Available from: <https://clinicaltrials.gov/ct2/show/record/NCT03259659> [Accessed 11 August 2020].
- 357 Clinicaltrials.gov. Intestinal Mesenchymal Stem Stells and Inflammatory Bowel Diseases (COSMIC). Trial ID: NCT03115749. 2017. Status: Not Yet Recruiting. Available from: <https://clinicaltrials.gov/ct2/show/record/NCT03115749> [Accessed 11 August 2020].

- 358 Clinicaltrials.gov. Behavioural Treatment for Functional Bowel Symptoms in Inflammatory Bowel Disease (LIBERATE). Trial ID: NCT03177044. 2017. Status: Active- Not Recruiting. Available from: <https://clinicaltrials.gov/ct2/show/record/NCT03177044> [Accessed 11 August 2020].
- 359 Clinicaltrials.gov. The FAIS-Trial: Faecal Microbiota Transplantation (FMT) in Adolescents With Refractory Irritable Bowel Syndrome (IBS) (FAIS). Trial ID: NCT03074227. 2017. Status: Recruiting. Available from: <https://clinicaltrials.gov/ct2/show/record/NCT03074227> [Accessed 11 August 2020].
- 360 Clinicaltrials.gov. Study to Explore the Therapeutic Effect of Eluxadoline in Treating Irritable Bowel Syndrome With Diarrhea in Children. Trial ID: NCT03339128. 2017. Status: Recruiting. Available from: <https://clinicaltrials.gov/ct2/show/record/NCT03339128> [Accessed 11 August 2020].
- 361 Clinicaltrials.gov. Comparing Two Types of Diets on Psychological and Gastrointestinal Symptoms. Trial ID: NCT03035799. 2017. Status: Recruiting. Available from: <https://clinicaltrials.gov/ct2/show/record/NCT03035799> [Accessed 11 August 2020].
- 362 Clinicaltrials.gov. Diet Reintroduction Study in Irritable Bowel Syndrome. Trial ID: NCT03052439. 2017. Status: Recruiting. Available from: <https://clinicaltrials.gov/ct2/show/record/NCT03052439> [Accessed 11 August 2020].
- 363 Clinicaltrials.gov. Efficacy of Low-FODMAPs Dietary Therapy for Irritable Bowel Syndrome in China. Trial ID: NCT03304041. 2017. Status: Completed. Available from: <https://clinicaltrials.gov/ct2/show/record/NCT03304041> [Accessed 11 August 2020].
- 364 Clinicaltrials.gov. The Multi-disciplinary Treatment of Functional Gut Disorders Study (MANTRA). Trial ID: NCT03078634. 2017. Status: Active- Not Recruiting. Available from: <https://clinicaltrials.gov/ct2/show/record/NCT03078634> [Accessed 11 August 2020].
- 365 Clinicaltrials.gov. Impact of Lower Urinary Tract Dysfunction on Clinical Manifestation in Patients With Stroke. Trial ID: NCT03174600. 2017. Status: Completed. Available from: <https://clinicaltrials.gov/ct2/show/record/NCT03174600> [Accessed 11 August 2020].
- 366 Clinicaltrials.gov. Induction of Labour for LGA fetus in Women Without Insulin-treated Diabetes. Trial ID: NCT03355040. 2017. Status: Completed. Available from: <https://clinicaltrials.gov/ct2/show/record/NCT03355040> [Accessed 11 August 2020].
- 367 Clinicaltrials.gov. INCB039110 in Combination With Dabrafenib and Trametinib in Patients With BRAF-mutant Melanoma and Other Solid Tumors. Trial ID: NCT03272464. 2017. Status: Recruiting. Available from: <https://clinicaltrials.gov/ct2/show/record/NCT03272464> [Accessed 11 August 2020].
- 368 Clinicaltrials.gov. Effectiveness of Assessment and Educational Intervention on Motor Control of the Pelvic Floor Muscle in Women (MENO\_edu). Trial ID: NCT03220672. 2017. Status: Completed. Available from: <https://clinicaltrials.gov/ct2/show/record/NCT03220672> [Accessed 11 August 2020].
- 369 Clinicaltrials.gov. Amino Acid Metabolism in Fed Surgical Critically Ill Patients. Trial ID: NCT03451968. 2017. Status: Active- Not Recruiting. Available from: <https://clinicaltrials.gov/ct2/show/record/NCT03451968> [Accessed 11 August 2020].
- 370 Clinicaltrials.gov. EndoTAG-1 Plus Gemcitabine Versus Gemcitabine Alone in Patients With Measurable Locally Advanced and/or Metastatic Adenocarcinoma of the Pancreas Failed on FOLFIRINOX Treatment. Trial ID: NCT03126435. 2017. Status: Recruiting. Available from: <https://clinicaltrials.gov/ct2/show/record/NCT03126435> [Accessed 11 August 2020].
- 371 Clinicaltrials.gov. A Health Service Research Study to Investigate Survival of Metastatic Pancreatic Cancer Patients After Sequential Chemotherapy (PANTHEON). Trial ID: NCT03331640. 2017. Status: Recruiting. Available from: <https://clinicaltrials.gov/ct2/show/record/NCT03331640> [Accessed 11 August 2020].
- 372 Clinicaltrials.gov. A Study of Dabrafenib and/or Trametinib in Patients With Relapsed and/or Refractory Multiple Myeloma. Trial ID: NCT03091257. 2017. Status: Recruiting. Available from: <https://clinicaltrials.gov/ct2/show/record/NCT03091257> [Accessed 11 August 2020].

- 373 Clinicaltrials.gov. Physiological Effects of N-Acetyl Cysteine in Patients With Multiple Sclerosis (MSNAC). Trial ID: NCT03032601. 2017. Status: Active- Not Recruiting. Available from: <https://clinicaltrials.gov/ct2/show/record/NCT03032601> [Accessed 11 August 2020].
- 374 Clinicaltrials.gov. Medication Usage and Patient Reported Outcomes Evaluation Via myBETAapp in Patients With Multiple Sclerosis Treated With Betaferon: a Pilot Study (PROmyBETAapp). Trial ID: NCT03134573. 2017. Status: Completed. Available from: <https://clinicaltrials.gov/ct2/show/record/NCT03134573> [Accessed 11 August 2020].
- 375 Clinicaltrials.gov. Stretching Isquiotibials in Water and on Land in Healthy Adults (Flexibility). Trial ID: NCT03350880. 2017. Status: Completed. Available from: <https://clinicaltrials.gov/ct2/show/record/NCT03350880> [Accessed 11 August 2020].
- 376 Clinicaltrials.gov. Intermittent Dosing Of Selumetinib In Childhood NF1 Associated Tumours (INSPECT). Trial ID: NCT03326388. 2017. Status: Recruiting. Available from: <https://clinicaltrials.gov/ct2/show/record/NCT03326388> [Accessed 11 August 2020].
- 377 Clinicaltrials.gov. The Effect of Prebiotic Fibres on Weight Loss in an Overweight and Obese Population (MNGII). Trial ID: NCT03135041. 2017. Status: Completed. Available from: <https://clinicaltrials.gov/ct2/show/record/NCT03135041> [Accessed 11 August 2020].
- 378 Clinicaltrials.gov. Metastatic Tumor Cell Trap Device in Patients With Advanced Ovarian Cancer. Trial ID: NCT03085238. 2017. Status: Completed. Available from: <https://clinicaltrials.gov/ct2/show/record/NCT03085238> [Accessed 11 August 2020].
- 379 Clinicaltrials.gov. Evaluation of Preoperative N1539 in Colorectal Surgery. Trial ID: NCT03323385. 2017. Status: Completed. Available from: <https://clinicaltrials.gov/ct2/show/record/NCT03323385> [Accessed 11 August 2020].
- 380 Clinicaltrials.gov. Probiotic Modulation of Intestinal Microbiota in Long-term Intake of Proton Pump Inhibitors. Trial ID: NCT03220802. 2017. Status: Active- Not Recruiting. Available from: <https://clinicaltrials.gov/ct2/show/record/NCT03220802> [Accessed 11 August 2020].
- 381 Clinicaltrials.gov. Dietary Intervention With Brain-friendly Diet (BRAVE). Trial ID: NCT03346486. 2017. Status: Completed. Available from: <https://clinicaltrials.gov/ct2/show/record/NCT03346486> [Accessed 11 August 2020].
- 382 Clinicaltrials.gov. PDIUC Protocol for Placental Accreta (PDIUC). Trial ID: NCT03273569. 2017. Status: Other. Available from: <https://clinicaltrials.gov/ct2/show/record/NCT03273569> [Accessed 11 August 2020].
- 383 Clinicaltrials.gov. Deprescribing of Symptomatic Medications in Rehabilitative or Subacute Care Patients. Trial ID: NCT03354845. 2017. Status: Other. Available from: <https://clinicaltrials.gov/ct2/show/record/NCT03354845> [Accessed 11 August 2020].
- 384 Clinicaltrials.gov. Effect of Resistant Starch on Insulin Sensitivity and Beta Cell Function in Subjects With Prediabetes. Trial ID: NCT03294915. 2017. Status: Not Yet Recruiting. Available from: <https://clinicaltrials.gov/ct2/show/record/NCT03294915> [Accessed 11 August 2020].
- 385 Clinicaltrials.gov. Metabolic Change in Prostate Cancer Bone Metastases on 68Ga-HBED-CC-PSMA PET/CT Following Radium-223 Therapy. Trial ID: NCT03062254. 2017. Status: Active- Not Recruiting. Available from: <https://clinicaltrials.gov/ct2/show/record/NCT03062254> [Accessed 11 August 2020].
- 386 Clinicaltrials.gov. Sexual Health and Rehabilitation eClinic (SHAReClinic). Trial ID: NCT03396848. 2017. Status: Active- Not Recruiting. Available from: <https://clinicaltrials.gov/ct2/show/record/NCT03396848> [Accessed 11 August 2020].
- 387 Clinicaltrials.gov. A Study to Characterize Profile of Participant With Psoriatic Arthritis Depending on Whether Their Disease is Managed by a Dermatologist or by a Rheumatologist- and Starting Ustekinumab (PROUST). Trial ID: NCT03336281. 2017. Status: Active- Not Recruiting. Available from: <https://clinicaltrials.gov/ct2/show/record/NCT03336281> [Accessed 11 August 2020].
- 388 Clinicaltrials.gov. Incontinence and Quality of Life in Children With Spina Bifida. Trial ID: NCT03410667. 2017. Status: Not Yet Recruiting. Available from: <https://clinicaltrials.gov/ct2/show/record/NCT03410667> [Accessed 11 August 2020].

- 389 Clinicaltrials.gov. Enhancing Recovery in Non-Traumatic Spinal Cord Injury. Trial ID: NCT03320759. 2017. Status: Not Yet Recruiting. Available from: <https://clinicaltrials.gov/ct2/show/record/NCT03320759> [Accessed 11 August 2020].
- 390 Clinicaltrials.gov. A Study in Participants With a Newly Confirmed Diagnosis of Spondyloarthritis (SpA) Who Are New to Conventional- Targeted and Biological DMARDs (SIRENA). Trial ID: NCT03131661. 2017. Status: Active- Not Recruiting. Available from: <https://clinicaltrials.gov/ct2/show/record/NCT03131661> [Accessed 11 August 2020].
- 391 Clinicaltrials.gov. Electroacupuncture for Poststroke Patients With Shoulder Pain (EAPSSP). Trial ID: NCT03086863. 2017. Status: Completed. Available from: <https://clinicaltrials.gov/ct2/show/record/NCT03086863> [Accessed 11 August 2020].
- 392 Clinicaltrials.gov. Efficacy and Safety of Nerve Root Axial Decompression Surgery in The Treatment of Tethered Cord Syndrome. Trial ID: NCT03262844. 2017. Status: Recruiting. Available from: <https://clinicaltrials.gov/ct2/show/record/NCT03262844> [Accessed 11 August 2020].
- 393 Clinicaltrials.gov. Stem Cell Spinal Cord Injury Exoskeleton and Virtual Reality Treatment Study (SciExVR). Trial ID: NCT03225625. 2017. Status: Recruiting. Available from: <https://clinicaltrials.gov/ct2/show/record/NCT03225625> [Accessed 11 August 2020].
- 394 Clinicaltrials.gov. Efficacy and Safety of Sotagliflozin Versus Placebo in Subjects With Type 2 Diabetes Mellitus Who Have Inadequate Glycemic Control While Taking Insulin Alone or With Other Oral Antidiabetic Agents (SOTA-INS). Trial ID: NCT03285594. 2017. Status: Completed. Available from: <https://clinicaltrials.gov/ct2/show/record/NCT03285594> [Accessed 11 August 2020].
- 395 Clinicaltrials.gov. Efficacy and Safety of Sotagliflozin Versus Glimepiride and Placebo in Subjects With Type 2 Diabetes Mellitus That Are Taking Metformin Monotherapy (SOTA-GLIM). Trial ID: NCT03332771. 2017. Status: Completed. Available from: <https://clinicaltrials.gov/ct2/show/record/NCT03332771> [Accessed 11 August 2020].
- 396 Clinicaltrials.gov. The Effect of Diet on Disease Activity and Symptoms in Patients With Ulcerative Colitis. Trial ID: NCT03053713. 2017. Status: Invitation. Available from: <https://clinicaltrials.gov/ct2/show/record/NCT03053713> [Accessed 11 August 2020].
- 397 Clinicaltrials.gov. The Efficacy of Cobitolimod in Patients With Moderate to Severe Active Ulcerative Colitis (CONDUCT). Trial ID: NCT03178669. 2017. Status: Active- Not Recruiting. Available from: <https://clinicaltrials.gov/ct2/show/record/NCT03178669> [Accessed 11 August 2020].
- 398 Clinicaltrials.gov. Efficacy and Safety Study of SHP647 as Induction Therapy in Participants With Moderate to Severe Ulcerative Colitis (FIGARO UC 302). Trial ID: NCT03259308. 2017. Status: Recruiting. Available from: <https://clinicaltrials.gov/ct2/show/record/NCT03259308> [Accessed 11 August 2020].
- 399 Clinicaltrials.gov. Efficacy and Safety Study of SHP647 as Induction Therapy in Participants With Moderate to Severe Ulcerative Colitis (FIGARO UC 301). Trial ID: NCT03259334. 2017. Status: Recruiting. Available from: <https://clinicaltrials.gov/ct2/show/record/NCT03259334> [Accessed 11 August 2020].
- 400 Clinicaltrials.gov. An Efficacy and Safety Study of Ontamalimab as Maintenance Therapy in Participants With Moderate to Severe Ulcerative Colitis (FIGARO UC 303). Trial ID: NCT03290781. 2017. Status: Recruiting. Available from: <https://clinicaltrials.gov/ct2/show/record/NCT03290781> [Accessed 11 August 2020].
- 401 Clinicaltrials.gov. Phase 2 Dose-finding IMU-838 for Ulcerative Colitis (CALDOSE-1). Trial ID: NCT03341962. 2017. Status: Recruiting. Available from: <https://clinicaltrials.gov/ct2/show/record/NCT03341962> [Accessed 11 August 2020].
- 402 Clinicaltrials.gov. Trial to Compare Urinary Continence Recovery After Robotic Radical Prostatectomy With or Without Rhabdosphincter Reconstruction. (RHABDO-PROST). Trial ID: NCT03302169. 2017. Status: Other. Available from: <https://clinicaltrials.gov/ct2/show/record/NCT03302169> [Accessed 11 August 2020].
- 403 Clinicaltrials.gov. ADAPT-BLADDER: Modern Immunotherapy in BCG-Relapsing Urothelial Carcinoma of the Bladder. Trial ID: NCT03317158. 2017. Status: Recruiting. Available from: <https://clinicaltrials.gov/ct2/show/record/NCT03317158> [Accessed 11 August 2020].

- 404 Clinicaltrials.gov. Rifaximin on Visceral Hypersensitivity. Trial ID: NCT03462966. 2017. Status: Recruiting. Available from: <https://clinicaltrials.gov/ct2/show/record/NCT03462966> [Accessed 11 August 2020].
- 405 Clinicaltrials.gov. A Study Comparing BGB-3111 and Ibrutinib in Participants With Waldenström's Macroglobulinemia (WM) (ASPEN). Trial ID: NCT03053440. 2017. Status: Active- Not Recruiting. Available from: <https://clinicaltrials.gov/ct2/show/record/NCT03053440> [Accessed 11 August 2020].
- 406 Clinicaltrials.gov. BLB Study Back or Leg Pain and Bladder Symptoms Study (BLB). Trial ID: NCT03325374. 2017. Status: Active- Not Recruiting. Available from: <https://clinicaltrials.gov/ct2/show/record/NCT03325374> [Accessed 11 August 2020].
- 407 Clinicaltrials.gov. Tridimensional Pelvic Floor Ultrasound and Quality of Life Scores Questionnaires in Nulliparous or Parous Women. Trial ID: NCT03656601. 2017. Status: Active- Not Recruiting. Available from: <https://clinicaltrials.gov/ct2/show/record/NCT03656601> [Accessed 11 August 2020].
- 408 Clinicaltrials.gov. Urinary and Anal Incontinence in Tunisian Women. Trial ID: NCT03386292. 2017. Status: Completed. Available from: <https://clinicaltrials.gov/ct2/show/record/NCT03386292> [Accessed 11 August 2020].
- 409 Clinicaltrials.gov. Determining Early Development of Faecal Incontinence and Anorectal Muscle Function After Surgery for Rectal Cancer. (EDFI-Cohort). Trial ID: NCT03257332. 2017. Status: Invitation. Available from: <https://clinicaltrials.gov/ct2/show/record/NCT03257332> [Accessed 11 August 2020].
- 410 Clinicaltrials.gov. Laparoscopic Lateral Mesh Suspension for Pelvic Organ Prolapse. Trial ID: NCT03387202. 2017. Status: Completed. Available from: <https://clinicaltrials.gov/ct2/show/record/NCT03387202> [Accessed 11 August 2020].
- 411 Clinicaltrials.gov. POPQ Versus Simulated Apical Support as a Guideline for Anterior or Posterior Repair During Vaginal Reconstruction. Trial ID: NCT03187054. 2017. Status: Recruiting. Available from: <https://clinicaltrials.gov/ct2/show/record/NCT03187054> [Accessed 11 August 2020].
- 412 EU Clinical Trials Register. TALAPRO 1: A PHASE 2- OPEN LABEL- RESPONSE RATE STUDY OF TALAZOPARIB IN MEN WITH DNA REPAIR DEFECTS AND METASTATIC CASTRATION RESISTANT PROSTATE CANCER WHO PREVIOUSLY RECEIVED TAXANE BASED CHEMOTHERAPY AND PROGRESSED ON AT LEAST 1 NOVEL HORMONAL AGENT (ENZALUTAMIDE AND/OR ABIRATERONE ACETATE/PREDNISON). Trial ID: 2016-002036-32/GB. 2017. Status: Completed. Available from: <https://www.clinicaltrialsregister.eu/ctr-search/trial/2016-002036-32/GB> [Accessed 11 August 2020].
- 413 EU Clinical Trials Register. Characterization of colonic motility patterns in different functional bowel disorders compared to health and their role in moving content Karakteriseren van colon motor patronen in verschillende functionele darmziekten in vergelijking met gezonden en hun rol in het voortbewegen van inhoud. Trial ID: 2017-002679-25/BE. 2017. Status: Ongoing. Available from: <https://www.clinicaltrialsregister.eu/ctr-search/trial/2017-002679-25/BE> [Accessed 11 August 2020].
- 414 EU Clinical Trials Register. Efficacy- safety and tolerability of a bowel cleansing preparation (Eziclen/Izinova ) in paediatric subjects undergoing colonoscopy: a Phase III- multicentre- randomised- comparative study versus Klean-Prep (PEG-Electrolytes)- administered on the day before colonoscopy- investigator-blinded- non-inferiority in adolescents of 12 to 17 years of age (inclusive) > 40 kg. Multicentrick - randomizovan - ste n zaslepen - non-inferioritn klinick hodnocen srovn vaj c innost- bezpe nost a sn enlivost p pravku na i t n st ev Eziclen /Izinova u pediatrick populace s p pravkem Klen-Prep (PEG-Elektrolyty) podan ch jeden den p ed kolonoskopi - u adolescentn ch pacient ve v ku 12 17 let (v etn ) > 40 kg.; EASYKID. Trial ID: 2016-002265-60/CZ. 2017. Status: Ongoing. Available from: <https://www.clinicaltrialsregister.eu/ctr-search/trial/2016-002265-60/CZ> [Accessed 11 August 2020].
- 415 EU Clinical Trials Register. A Phase 3- Randomized- Double-Blind- Double-Dummy- Multicenter- Prospective Study to Assess the Efficacy and Safety of IV Eravacycline Compared with Ertapenem in Complicated Urinary Tract Infections 3- - - - -; IGNITE 3. Trial ID: 2016-002207-26/BG. 2017. Status: Completed. Available from: <https://www.clinicaltrialsregister.eu/ctr-search/trial/2016-002207-26/BG> [Accessed 11 August 2020].

- 416 EU Clinical Trials Register. Randomized- Double-Blind- Multi-Center Study of Cefepime/AAI101 in Hospitalized Adults With Complicated Urinary Tract Infections- Including Acute Pyelonephritis. Trial ID: 2016-005161-31/HU. 2017. Status: Completed. Available from: <https://www.clinicaltrialsregister.eu/ctr-search/trial/2016-005161-31/HU> [Accessed 11 August 2020].
- 417 EU Clinical Trials Register. A PHASE 1/2- OPEN-LABEL- MULTICENTER STUDY TO INVESTIGATE THE SAFETY- PHARMACOKINETICS- AND EFFICACY OF TAS0728- AN ORAL COVALENT BINDING INHIBITOR OF HER2- IN SUBJECTS WITH ADVANCED SOLID TUMORS WITH HER2 OR HER3 ABNORMALITIES. Trial ID: 2017-004415-39/GB. 2017. Status: Ongoing. Available from: <https://www.clinicaltrialsregister.eu/ctr-search/trial/2017-004415-39/GB> [Accessed 11 August 2020].
- 418 EU Clinical Trials Register. Treatment of Irritable bowel syndrome using Titrated Ondansetron Trial; TRITON Trial v1.0. Trial ID: 2017-000533-31/GB. 2017. Status: Ongoing. Available from: <https://www.clinicaltrialsregister.eu/ctr-search/trial/2017-000533-31/GB> [Accessed 11 August 2020].
- 419 EU Clinical Trials Register. Phase III CLINICAL TRIAL- MULCHNTRIC- RANDOMIZED- BLIND DOUBLE IN TWO PARALLEL GROUPS TO COMPARE THE EFFECTIVENESS AND SAFETY OF THE SIMPLE CLOSURE OF THE CRYPTOGLANDULAR ANAL FISTULA WITH OR WITHOUT THE ADJUVANT ADMINISTRATION OF PLASMA RICO IN GROWTH FACTORS (ENDORET / PRGF TECHNOLOGY)- IN A PERIOD OF 48 WEEKS ENSAYO CLINICO FASE III- MULTICENTRICO- ALEATORIZADO- DOBLE CIEGO EN DOS GRUPOS PARALELOS PARA COMPARAR LA EFICACIA Y SEGURIDAD DEL CIERRE SIMPLE DE LA FISTULA ANAL CRIPTOGLANDULAR CON O SIN LA ADMINISTRACION ADYUVANTE DE PLASMA RICO EN FACTORES DE CRECIMIENTO (TECNOLOGIA ENDORET /PRGF )- EN UN PERIODO DE 48 SEMANAS; PRGF IN ACF PRGF EN FAC. Trial ID: 2017-001209-34/ES. 2017. Status: Ongoing. Available from: <https://www.clinicaltrialsregister.eu/ctr-search/trial/2017-001209-34/ES> [Accessed 11 August 2020].
- 420 EU Clinical Trials Register. A Phase 3 Long-term Safety Extension Study of SHP647 in Subjects with Moderate to Severe Ulcerative Colitis or Crohn's Disease (AIDA); AIDA. Trial ID: 2017-000574-11/NL. 2017. Status: Ongoing. Available from: <https://www.clinicaltrialsregister.eu/ctr-search/trial/2017-000574-11/NL> [Accessed 11 August 2020].
- 421 ISRCTN Registry. MRI for early response prediction to anti-TNF therapy. Trial ID: ISRCTN14481560. 2017. Status: Recruiting. Available from: <http://www.isrctn.com/ISRCTN14481560> [Accessed 11 August 2020].
- 422 ISRCTN Registry. Pancreatic replacement therapy and glycaemic control in diabetes. Trial ID: ISRCTN14889127. 2017. Status: Completed. Available from: <http://www.isrctn.com/ISRCTN14889127> [Accessed 11 August 2020].
- 423 ISRCTN Registry. Probiotics for infant colic. Trial ID: ISRCTN13340073. 2017. Status: Completed. Available from: <http://www.isrctn.com/ISRCTN13340073> [Accessed 11 August 2020].
- 424 ISRCTN Registry. Treatment of Irritable bowel syndrome with diarrhoea using titrated ondansetron. Trial ID: ISRCTN17508514. 2017. Status: Recruiting. Available from: <http://www.isrctn.com/ISRCTN17508514> [Accessed 11 August 2020].
- 425 ISRCTN Registry. Enterogel in the treatment of Irritable Bowel Syndrome with Diarrhoea. Trial ID: ISRCTN17149988. 2017. Status: Recruiting. Available from: <http://www.isrctn.com/ISRCTN17149988> [Accessed 11 August 2020].
- 426 ISRCTN Registry. GP reminders for bowel scope screening non-participants. Trial ID: ISRCTN82867861. 2017. Status: Ongoing. Available from: <http://www.isrctn.com/ISRCTN82867861> [Accessed 11 August 2020].
- 427 ISRCTN Registry. A randomised controlled trial to assess the safety and effectiveness of stem cell transplantation using a reduced intensity regimen in patients with treatment resistant Crohn's disease. Trial ID: ISRCTN17160440. 2017. Status: Recruiting. Available from: <http://www.isrctn.com/ISRCTN17160440> [Accessed 11 August 2020].
- 428 ISRCTN Registry. Effects of vitamin D supplementation in type 1 diabetes mellitus patients. Trial ID: ISRCTN32601947. 2017. Status: Completed. Available from: <http://www.isrctn.com/ISRCTN32601947> [Accessed 11 August 2020].
- 429 ISRCTN Registry. Improving Parkinson's related overactive bladder. Trial ID: ISRCTN13217913. 2017. Status: Completed. Available from: <http://www.isrctn.com/ISRCTN13217913> [Accessed 11 August 2020].

- 430 Sri Lanka Clinical Trials Registry. Tranexamic acid with norethisterone versus tranexamic acid alone in treatment of vaginal bleeding during dengue infection. Trial ID: SLCTR/2017/037. 2017. Status: Not Yet Recruiting. Available from: <http://slctr.lk/trials/slctr-2017-037.html> [Accessed 11 August 2020].
- 431 UMIN Clinical Trials Registry (UMIN-CTR). COBRA Trial. Trial ID: UMIN000026158. 2017. Status: Recruiting. Available from: [https://upload.umin.ac.jp/cgi-open-bin/ctr\\_e/ctr\\_view.cgi?recptno=R000029703](https://upload.umin.ac.jp/cgi-open-bin/ctr_e/ctr_view.cgi?recptno=R000029703) [Accessed 11 August 2020].
- 432 UMIN Clinical Trials Registry (UMIN-CTR). A randomized controlled trial of the cognitive behavioral therapy for irritable bowel syndrome. Trial ID: UMIN000030620. 2017. Status: Not Yet Recruiting. Available from: [https://upload.umin.ac.jp/cgi-open-bin/ctr\\_e/ctr\\_view.cgi?recptno=R000034965](https://upload.umin.ac.jp/cgi-open-bin/ctr_e/ctr_view.cgi?recptno=R000034965) [Accessed 11 August 2020].
- 433 Australian New Zealand Clinical Trials Registry (ANZCTR). A trial to increase participation in the National Bowel Cancer Screening Program by eligible Indigenous clients of participating primary health care centres that receive either an intensive model of support or a low intensity model of support in offering screening. Trial ID: ACTRN12618001555246. 2018. Status: Not Yet Recruiting. Available from: <https://www.anzctr.org.au/Trial/Registration/TrialReview.aspx?id=375936&isReview=true> [Accessed 11 August 2020].
- 434 Australian New Zealand Clinical Trials Registry (ANZCTR). The Sydney 1000 Bowel Cancer Study and Biobank: a 10 year observational study following the treatment pathways and outcomes of 1000 patients recently diagnosed with colorectal cancer (CRC). Trial ID: ACTRN12618000054213. 2018. Status: Recruiting. Available from: <https://www.anzctr.org.au/Trial/Registration/TrialReview.aspx?id=373540&isReview=true> [Accessed 11 August 2020].
- 435 Australian New Zealand Clinical Trials Registry (ANZCTR). Improving the response to high intensity interval training through the ingestion of a daily prebiotic fibre. Trial ID: ACTRN12618000501246p. 2018. Status: Not Yet Recruiting. Available from: <https://www.anzctr.org.au/Trial/Registration/TrialReview.aspx?id=374601&isReview=true> [Accessed 11 August 2020].
- 436 Australian New Zealand Clinical Trials Registry (ANZCTR). Impact of knowledge of vascular disease on Modification Of Diet-Exercise and Lifestyle: The MODEL study. Trial ID: ACTRN12618001087246. 2018. Status: Recruiting. Available from: <https://www.anzctr.org.au/Trial/Registration/TrialReview.aspx?id=375371&isReview=true> [Accessed 11 August 2020].
- 437 Australian New Zealand Clinical Trials Registry (ANZCTR). Does metronidazole improve symptoms of irritable bowel syndrome in cases of colonic spirochaetosis? Trial ID: ACTRN12618001020279p. 2018. Status: Not Yet Recruiting. Available from: <https://www.anzctr.org.au/Trial/Registration/TrialReview.aspx?id=375280&isReview=true> [Accessed 11 August 2020].
- 438 Australian New Zealand Clinical Trials Registry (ANZCTR). Bowel Preparation Assessment Using Ultrasound Examination II. Trial ID: ACTRN12618000617268p. 2018. Status: Not Yet Recruiting. Available from: <https://www.anzctr.org.au/Trial/Registration/TrialReview.aspx?id=374670&isReview=true> [Accessed 11 August 2020].
- 439 Australian New Zealand Clinical Trials Registry (ANZCTR). Digestive health effects of high amylose wheat in healthy Australian men and women. Trial ID: ACTRN12618001060235. 2018. Status: Not Yet Recruiting. Available from: <https://www.anzctr.org.au/Trial/Registration/TrialReview.aspx?id=375356&isReview=true> [Accessed 11 August 2020].
- 440 Australian New Zealand Clinical Trials Registry (ANZCTR). eADVICE (electronic Advice and Diagnosis Via the Internet following Computerised Evaluation)- an interactive eHealth program addressing paediatric urinary incontinence for reducing waiting times in paediatric urinary incontinence outpatient clinics. Trial ID: ACTRN12618001484235p. 2018. Status: Not Yet Recruiting. Available from: <https://www.anzctr.org.au/Trial/Registration/TrialReview.aspx?id=375172&isReview=true> [Accessed 11 August 2020].
- 441 Australian New Zealand Clinical Trials Registry (ANZCTR). Efficacy of Inferrin<sup>TM</sup> and lactoferrin on symptoms of Irritable Bowel Syndrome. A randomized double-blind placebo-controlled study. Trial ID: ACTRN12618001447246. 2018. Status: Not Yet Recruiting. Available from: <https://www.anzctr.org.au/Trial/Registration/TrialReview.aspx?id=375498&isReview=true> [Accessed 11 August 2020].

- 442 Australian New Zealand Clinical Trials Registry (ANZCTR). The Impact of SunGold kiwifruit on immune status and inflammatory response. Trial ID: ACTRN12618000340235p. 2018. Status: Not Yet Recruiting. Available from: <https://www.anzctr.org.au/Trial/Registration/TrialReview.aspx?id=374598&isReview=true> [Accessed 11 August 2020].
- 443 Australian New Zealand Clinical Trials Registry (ANZCTR). The effect of fruit anthocyanins in participants attending a cognitive rehabilitation group for mild cognitive impairment: A randomised controlled trial. Trial ID: ACTRN12618001184268. 2018. Status: Recruiting. Available from: <https://www.anzctr.org.au/Trial/Registration/TrialReview.aspx?id=375416&isReview=true> [Accessed 11 August 2020].
- 444 Australian New Zealand Clinical Trials Registry (ANZCTR). A Phase 2 placebo controlled- double-blind randomised clinical trial assessing the efficacy of a Herbal supplement for Nocturnal Enuresis in Children. Trial ID: ACTRN12618000288224. 2018. Status: Recruiting. Available from: <https://www.anzctr.org.au/Trial/Registration/TrialReview.aspx?id=374160&isReview=true> [Accessed 11 August 2020].
- 445 Australian New Zealand Clinical Trials Registry (ANZCTR). Testing two interventions to reduce the time needed to recover after surgery for ovarian cancer. Trial ID: ACTRN12618002029279. 2018. Status: Recruiting. Available from: <https://www.anzctr.org.au/Trial/Registration/TrialReview.aspx?id=376419&isReview=true> [Accessed 11 August 2020].
- 446 Australian New Zealand Clinical Trials Registry (ANZCTR). Does resistant starch reduce diarrhoea and improve nutrition and quality of life in people with short bowel syndrome. Trial ID: ACTRN12618000312246p. 2018. Status: Not Yet Recruiting. Available from: <https://www.anzctr.org.au/Trial/Registration/TrialReview.aspx?id=374464&isReview=true> [Accessed 11 August 2020].
- 447 Australian New Zealand Clinical Trials Registry (ANZCTR). Polyvinyl chloride ring pessary versus silicon irregular hexagon pessary for pelvic organ prolapse: a randomised trial comparing treatment success. Trial ID: ACTRN12618000416291. 2018. Status: Recruiting. Available from: <https://www.anzctr.org.au/Trial/Registration/TrialReview.aspx?id=370885&isReview=true> [Accessed 11 August 2020].
- 448 Clinical Research Information Service (CRIS). The effect of enhanced education for bowel preparation using a combination of educational video and telephone based re-education: Prospective- colonoscopist-blinded- randomized controlled study. Trial ID: KCT0003184. 2018. Status: Completed. Available from: [https://cris.nih.go.kr/cris/en/search/search\\_result\\_st01.jsp?seq=16217](https://cris.nih.go.kr/cris/en/search/search_result_st01.jsp?seq=16217) [Accessed 11 August 2020].
- 449 Clinical Research Information Service (CRIS). The Effect of Recovery Enhancement Program for Patients with Rectal Cancer Surgery. Trial ID: KCT0003505. 2018. Status: Recruiting. Available from: [https://cris.nih.go.kr/cris/en/search/search\\_result\\_st01.jsp?seq=13708](https://cris.nih.go.kr/cris/en/search/search_result_st01.jsp?seq=13708) [Accessed 11 August 2020].
- 450 Clinical Trials Registry - India (CTRI). Role of chewing gum in return of gut motility after surgery. Trial ID: CTRI/2018/11/016427. 2018. Status: Not Available. Available from: <http://ctri.nic.in/Clinicaltrials/pmaindet2.php?trialid=29068> [Accessed 11 August 2020].
- 451 Clinical Trials Registry - India (CTRI). Role of negative pressure dressing in bowel perforation wounds A randomized control study. Trial ID: CTRI/2018/08/015489. 2018. Status: Not Available. Available from: <http://ctri.nic.in/Clinicaltrials/pmaindet2.php?trialid=27735> [Accessed 11 August 2020].
- 452 Clinical Trials Registry - India (CTRI). A comparative study of fistulectomy versus fistulotomy with marsupialization in patients of simple anal fistula. Trial ID: CTRI/2018/03/012363. 2018. Status: Not Available. Available from: <http://ctri.nic.in/Clinicaltrials/pmaindet2.php?trialid=21817> [Accessed 11 August 2020].
- 453 Clinical Trials Registry - India (CTRI). A clinical study to study the effect of a herbal formulation in patients with diarrhoea in comparison with oral rehydration therapy. Trial ID: CTRI/2018/03/012699. 2018. Status: Not Available. Available from: <http://ctri.nic.in/Clinicaltrials/pmaindet2.php?trialid=24014> [Accessed 11 August 2020].

- 454 Clinical Trials Registry - India (CTRI). A Comparison of siddha literature vasana vatham with modern literature. Trial ID: CTRI/2018/04/012934. 2018. Status: Not Available. Available from: <http://ctri.nic.in/Clinicaltrials/pmaindet2.php?trialid=24038> [Accessed 11 August 2020].
- 455 Clinicaltrials.gov. ID-JPL934 for Abnormal Bowel Movement. Trial ID: NCT03395626. 2018. Status: Other. Available from: <https://clinicaltrials.gov/ct2/show/record/NCT03395626> [Accessed 11 August 2020].
- 456 Clinicaltrials.gov. Mechanical Bowel Preparation and Oral Antibiotics Before Colon Cancer Surgery (COLONPREP). Trial ID: NCT03475680. 2018. Status: Recruiting. Available from: <https://clinicaltrials.gov/ct2/show/record/NCT03475680> [Accessed 11 August 2020].
- 457 Clinicaltrials.gov. A Study to Evaluate the Efficacy of the Investigational Products on Complete Spontaneous Bowel Movements in Participants Who Normally Have 3 Complete Spontaneous Bowel Movements Per Week But Are Otherwise Healthy. Trial ID: NCT03462199. 2018. Status: Recruiting. Available from: <https://clinicaltrials.gov/ct2/show/record/NCT03462199> [Accessed 11 August 2020].
- 458 Clinicaltrials.gov. One Plus One Equals Two- Will That do? (Oneplus). Trial ID: NCT03770962. 2018. Status: Recruiting. Available from: <https://clinicaltrials.gov/ct2/show/record/NCT03770962> [Accessed 11 August 2020].
- 459 Clinicaltrials.gov. Intersphincteric Resection With or Without Intraoperative Radiation in Rectal Cancer (IDAVON). Trial ID: NCT03393234. 2018. Status: Recruiting. Available from: <https://clinicaltrials.gov/ct2/show/record/NCT03393234> [Accessed 11 August 2020].
- 460 Clinicaltrials.gov. Transanal Versus Laparoscopic Total Mesorectal Excision for Rectal Cancer. (taTME). Trial ID: NCT03413904. 2018. Status: Recruiting. Available from: <https://clinicaltrials.gov/ct2/show/record/NCT03413904> [Accessed 11 August 2020].
- 461 Clinicaltrials.gov. BReak Interval Delayed Surgery for Gastrointestinal Extraperitoneal Rectal Cancer (BRIDGE). Trial ID: NCT03581344. 2018. Status: Not Yet Recruiting. Available from: <https://clinicaltrials.gov/ct2/show/record/NCT03581344> [Accessed 11 August 2020].
- 462 Clinicaltrials.gov. Timing for Rectal Surgery After Chemoradiotherapy (ST812). Trial ID: NCT03607370. 2018. Status: Recruiting. Available from: <https://clinicaltrials.gov/ct2/show/record/NCT03607370> [Accessed 11 August 2020].
- 463 Clinicaltrials.gov. Quality of Life in Patients With Rectal Cancer Receiving Total Mesorectal Excision With or Without Stoma. Trial ID: NCT03487484. 2018. Status: Recruiting. Available from: <https://clinicaltrials.gov/ct2/show/record/NCT03487484> [Accessed 11 August 2020].
- 464 Clinicaltrials.gov. Organ Preservation in Locally Advanced Rectal Cancer by Radiochemotherapy Followed by Consolidation Chemotherapy. (CAO/ARO/AIO-16). Trial ID: NCT03561142. 2018. Status: Recruiting. Available from: <https://clinicaltrials.gov/ct2/show/record/NCT03561142> [Accessed 11 August 2020].
- 465 Clinicaltrials.gov. Mechanical Bowel Preparation and Oral Antibiotics Before Rectal Cancer Surgery (PREPACOL2). Trial ID: NCT03491540. 2018. Status: Recruiting. Available from: <https://clinicaltrials.gov/ct2/show/record/NCT03491540> [Accessed 11 August 2020].
- 466 Clinicaltrials.gov. Evaluation of Pelvic Peritonization in Low Anterior Resection for Rectal Cancer. Trial ID: NCT03699761. 2018. Status: Not Yet Recruiting. Available from: <https://clinicaltrials.gov/ct2/show/record/NCT03699761> [Accessed 11 August 2020].
- 467 Clinicaltrials.gov. Discharge Planning in Emergency Department for Frail Older With AHF. Trial ID: NCT03696875. 2018. Status: Recruiting. Available from: <https://clinicaltrials.gov/ct2/show/record/NCT03696875> [Accessed 11 August 2020].
- 468 Clinicaltrials.gov. The Feasibility of a Dietary Intervention in Children With ADHD. Trial ID: NCT03737877. 2018. Status: Active- Not Recruiting. Available from: <https://clinicaltrials.gov/ct2/show/record/NCT03737877> [Accessed 11 August 2020].

- 469 Clinicaltrials.gov. Dietary Fiber Intake in Alcohol-dependent Patients. Trial ID: NCT03803709. 2018. Status: Recruiting. Available from: <https://clinicaltrials.gov/ct2/show/record/NCT03803709> [Accessed 11 August 2020].
- 470 Clinicaltrials.gov. Impact of Life Events and Psychological Stress in Rheumatoid Arthritis Set-up : Case-control Study Within a Multifactorial and Integrative Psychological Model (Stress-PR). Trial ID: NCT03550833. 2018. Status: Completed. Available from: <https://clinicaltrials.gov/ct2/show/record/NCT03550833> [Accessed 11 August 2020].
- 471 Clinicaltrials.gov. Vaginal Birth After Caesarean Section and Levator Ani Avulsion. Trial ID: NCT03420001. 2018. Status: Recruiting. Available from: <https://clinicaltrials.gov/ct2/show/record/NCT03420001> [Accessed 11 August 2020].
- 472 Clinicaltrials.gov. Avelumab and Radiation in Muscle-Invasive Bladder Cancer. Trial ID: NCT03747419. 2018. Status: Recruiting. Available from: <https://clinicaltrials.gov/ct2/show/record/NCT03747419> [Accessed 11 August 2020].
- 473 Clinicaltrials.gov. Chemoradiotherapy With or Without Atezolizumab in Treating Patients With Localized Muscle Invasive Bladder Cancer. Trial ID: NCT03775265. 2018. Status: Recruiting. Available from: <https://clinicaltrials.gov/ct2/show/record/NCT03775265> [Accessed 11 August 2020].
- 474 Clinicaltrials.gov. PHOENIX DDR/Anti-PD-L1 Trial: A Pre-surgical Window of Opportunity and Post-surgical Adjuvant Biomarker Study of DNA Damage Response Inhibition and/or Anti-PD-L1 Immunotherapy in Patients With Neoadjuvant Chemotherapy Resistant Residual Triple Negative Breast Cancer (PHOENIX). Trial ID: NCT03740893. 2018. Status: Recruiting. Available from: <https://clinicaltrials.gov/ct2/show/record/NCT03740893> [Accessed 11 August 2020].
- 475 Clinicaltrials.gov. Comparing Local Anesthetics for Transversus Abdominis Plane (TAP) Block During Abdominally-based Free Flap for Breast Reconstruction. Trial ID: NCT03700970. 2018. Status: Recruiting. Available from: <https://clinicaltrials.gov/ct2/show/record/NCT03700970> [Accessed 11 August 2020].
- 476 Clinicaltrials.gov. Oxalobacter Formigenes Colonization and Urinary Oxalate Excretion. Trial ID: NCT03752684. 2018. Status: Recruiting. Available from: <https://clinicaltrials.gov/ct2/show/record/NCT03752684> [Accessed 11 August 2020].
- 477 Clinicaltrials.gov. Effect of FODMAP Restriction on Persistent GI-symptoms in Coeliac Patients. Trial ID: NCT03678935. 2018. Status: Active- Not Recruiting. Available from: <https://clinicaltrials.gov/ct2/show/record/NCT03678935> [Accessed 11 August 2020].
- 478 Clinicaltrials.gov. Environment Analysis Inside an Investigational Prescription Bottle. Trial ID: NCT03752411. 2018. Status: Recruiting. Available from: <https://clinicaltrials.gov/ct2/show/record/NCT03752411> [Accessed 11 August 2020].
- 479 Clinicaltrials.gov. Home Neuromodulation of the Neurogenic Bladder in Chronic Spinal Cord Injury With Transcutaneous Tibial Nerve Stimulation (HomeTTNS). Trial ID: NCT03458871. 2018. Status: Completed. Available from: <https://clinicaltrials.gov/ct2/show/record/NCT03458871> [Accessed 11 August 2020].
- 480 Clinicaltrials.gov. Data Collection for Motor Function and Gait Pattern Analysis of Patients With Chronic Stroke. Trial ID: NCT03468166. 2018. Status: Recruiting. Available from: <https://clinicaltrials.gov/ct2/show/record/NCT03468166> [Accessed 11 August 2020].
- 481 Clinicaltrials.gov. Nivolumab and Ipilimumab in Treating Patients With Esophageal and Gastroesophageal Junction Adenocarcinoma Undergoing Surgery. Trial ID: NCT03604991. 2018. Status: Recruiting. Available from: <https://clinicaltrials.gov/ct2/show/record/NCT03604991> [Accessed 11 August 2020].
- 482 Clinicaltrials.gov. A Study to Evaluate Disease Control and Treatment Pattern in Participants With Moderate to Severe Inflammatory Bowel Disease (IBD) in Real Life Practice (INTENT). Trial ID: NCT03532932. 2018. Status: Recruiting. Available from: <https://clinicaltrials.gov/ct2/show/record/NCT03532932> [Accessed 11 August 2020].
- 483 Clinicaltrials.gov. Evaluation of Information on Bowel Preparation for Morning Colonoscopy. Trial ID: NCT03650725. 2018. Status: Recruiting. Available from: <https://clinicaltrials.gov/ct2/show/record/NCT03650725> [Accessed 11 August 2020].

- 484 Clinicaltrials.gov. Anastomotic Leakage and Enhanced Recovery Pathways After Colorectal Surgery (iCral2). Trial ID: NCT03771456. 2018. Status: Recruiting. Available from: <https://clinicaltrials.gov/ct2/show/record/NCT03771456> [Accessed 11 August 2020].
- 485 Clinicaltrials.gov. Study of Cefepime-tazobactam (FEP-TAZ) in Complicated Urinary Tract Infection (cUTI) or Acute Pyelonephritis (AP). Trial ID: NCT03630081. 2018. Status: Not Yet Recruiting. Available from: <https://clinicaltrials.gov/ct2/show/record/NCT03630081> [Accessed 11 August 2020].
- 486 Clinicaltrials.gov. Study to Assess the Efficacy- Safety and Pharmacokinetics of Orally Administered Tebipenem Pivoxil Hydrobromide (SPR994) Compared to Intravenous Ertapenem in Patients With Complicated Urinary Tract Infection (cUTI) or Acute Pyelonephritis (AP) (ADAPT-PO). Trial ID: NCT03788967. 2018. Status: Recruiting. Available from: <https://clinicaltrials.gov/ct2/show/record/NCT03788967> [Accessed 11 August 2020].
- 487 Clinicaltrials.gov. Effect of SB CD on Chylomicron. Trial ID: NCT03496818. 2018. Status: Recruiting. Available from: <https://clinicaltrials.gov/ct2/show/record/NCT03496818> [Accessed 11 August 2020].
- 488 Clinicaltrials.gov. Efficacy and Safety Study of SHP647 as Induction Therapy in Participants With Moderate to Severe Crohn's Disease (CARMEN CD 305) (CARMEN CD 305). Trial ID: NCT03559517. 2018. Status: Recruiting. Available from: <https://clinicaltrials.gov/ct2/show/record/NCT03559517> [Accessed 11 August 2020].
- 489 Clinicaltrials.gov. Efficacy and Safety Study of SHP647 as Induction Therapy in Participants With Moderate to Severe Crohn's Disease (CARMEN CD 306) (CARMEN CD 306). Trial ID: NCT03566823. 2018. Status: Recruiting. Available from: <https://clinicaltrials.gov/ct2/show/record/NCT03566823> [Accessed 11 August 2020].
- 490 Clinicaltrials.gov. Efficacy and Safety Study of SHP647 as Maintenance Treatment in Participants With Moderate to Severe Crohn's Disease (CARMEN CD 307) (CARMEN CD 307). Trial ID: NCT03627091. 2018. Status: Recruiting. Available from: <https://clinicaltrials.gov/ct2/show/record/NCT03627091> [Accessed 11 August 2020].
- 491 Clinicaltrials.gov. A Study Testing How BI 655130 Works in Patients With Fistulizing Crohn's Disease. Trial ID: NCT03752970. 2018. Status: Recruiting. Available from: <https://clinicaltrials.gov/ct2/show/record/NCT03752970> [Accessed 11 August 2020].
- 492 Clinicaltrials.gov. Evaluation of Local Co-administration of Autologous Adipose Derived Stromal Vascular Fraction With Microfat for Refractory Perianal CROHN's Fistulas. (ADICROHN2). Trial ID: NCT04010526. 2018. Status: Not Yet Recruiting. Available from: <https://clinicaltrials.gov/ct2/show/record/NCT04010526> [Accessed 11 August 2020].
- 493 Clinicaltrials.gov. A Study to Evaluate Disease Control- Treatment Patterns- Burden of Disease and Quality of Life in Participants With Moderate to Severe Inflammatory Bowel Disease (IBD) (RISE AR). Trial ID: NCT03488030. 2018. Status: Completed. Available from: <https://clinicaltrials.gov/ct2/show/record/NCT03488030> [Accessed 11 August 2020].
- 494 Clinicaltrials.gov. The Feasibility of Following the Crohn's Diet. Trial ID: NCT03691155. 2018. Status: Completed. Available from: <https://clinicaltrials.gov/ct2/show/record/NCT03691155> [Accessed 11 August 2020].
- 495 Clinicaltrials.gov. Permacol Paste in Perianal Crohn's Disease (UPpCro). Trial ID: NCT03776825. 2018. Status: Recruiting. Available from: <https://clinicaltrials.gov/ct2/show/record/NCT03776825> [Accessed 11 August 2020].
- 496 Clinicaltrials.gov. Laser Therapy in Managing Vaginal Prolapse. Trial ID: NCT03714607. 2018. Status: Active- Not Recruiting. Available from: <https://clinicaltrials.gov/ct2/show/record/NCT03714607> [Accessed 11 August 2020].
- 497 Clinicaltrials.gov. Voiding School as a Treatment of Children's Day-time Incontinence or Enuresis. Trial ID: NCT03478813. 2018. Status: Other. Available from: <https://clinicaltrials.gov/ct2/show/record/NCT03478813> [Accessed 11 August 2020].
- 498 Clinicaltrials.gov. A Study to Evaluate the Safety- Tolerability- PK and PD of DA-1241 in Healthy Male Subjects and Subjects With T2DM. Trial ID: NCT03646721. 2018. Status: Recruiting. Available from: <https://clinicaltrials.gov/ct2/show/record/NCT03646721> [Accessed 11 August 2020].

- 499 Clinicaltrials.gov. The Protective Immune Response to Attenuated Enterotoxigenic Escherichia Coli Infection (MIRRE). Trial ID: NCT03596827. 2018. Status: Completed. Available from: <https://clinicaltrials.gov/ct2/show/record/NCT03596827> [Accessed 11 August 2020].
- 500 Clinicaltrials.gov. PREDICtors for Quality of Life After Sigmoidectomy for Diverticular Disease (PREDIC-DIV). Trial ID: NCT03527706. 2018. Status: Recruiting. Available from: <https://clinicaltrials.gov/ct2/show/record/NCT03527706> [Accessed 11 August 2020].
- 501 Clinicaltrials.gov. The Role of Short Chain Fatty Acids in Microbiota-gut-brain Axis (SCFA-AP). Trial ID: NCT03688854. 2018. Status: Completed. Available from: <https://clinicaltrials.gov/ct2/show/record/NCT03688854> [Accessed 11 August 2020].
- 502 Clinicaltrials.gov. Treatment by HIFU With Focal One of Posterior Deep Infiltrating Endometriosis Lesions With Intestinal Involvement. Trial ID: NCT03613298. 2018. Status: Completed. Available from: <https://clinicaltrials.gov/ct2/show/record/NCT03613298> [Accessed 11 August 2020].
- 503 Clinicaltrials.gov. Robot-assisted Versus Standard Laparoscopic Approach for the Surgical Treatment of Deep Infiltrating Endometriosis. Trial ID: NCT03633786. 2018. Status: Recruiting. Available from: <https://clinicaltrials.gov/ct2/show/record/NCT03633786> [Accessed 11 August 2020].
- 504 Clinicaltrials.gov. NEC Screening Abdominal Radiograph vs Bowel Ultrasound in Preemies. Trial ID: NCT03963011. 2018. Status: Recruiting. Available from: <https://clinicaltrials.gov/ct2/show/record/NCT03963011> [Accessed 11 August 2020].
- 505 Clinicaltrials.gov. Innate Immunity in Eosinophilic Esophagitis (CLOE). Trial ID: NCT03640975. 2018. Status: Not Yet Recruiting. Available from: <https://clinicaltrials.gov/ct2/show/record/NCT03640975> [Accessed 11 August 2020].
- 506 Clinicaltrials.gov. FMT in Inflammatory Bowel Disease. Trial ID: NCT03477032. 2018. Status: Recruiting. Available from: <https://clinicaltrials.gov/ct2/show/record/NCT03477032> [Accessed 11 August 2020].
- 507 Clinicaltrials.gov. A Study to Assess Primarily the Tolerability and Safety of SAR439794 After Repeated Sublingual Daily Administration in Peanut Allergic Adult and Adolescent Patients. Trial ID: NCT03463135. 2018. Status: Active- Not Recruiting. Available from: <https://clinicaltrials.gov/ct2/show/record/NCT03463135> [Accessed 11 August 2020].
- 508 Clinicaltrials.gov. The Effects of Dietary Fiber on the Gut Microbiome and HDL Particles of Human Subjects. Trial ID: NCT03785860. 2018. Status: Recruiting. Available from: <https://clinicaltrials.gov/ct2/show/record/NCT03785860> [Accessed 11 August 2020].
- 509 Clinicaltrials.gov. A Comparative Pharmacokinetic Study to Evaluate the Ability of a New Formulation to Enhance Curcuminoids Bioavailability (TURBIO). Trial ID: NCT03621865. 2018. Status: Completed. Available from: <https://clinicaltrials.gov/ct2/show/record/NCT03621865> [Accessed 11 August 2020].
- 510 Clinicaltrials.gov. Pharmacokinetics Assessing Bioavailability of Gingerols and Shogaols of Five Ginger Extracts (KING). Trial ID: NCT03698318. 2018. Status: Active- Not Recruiting. Available from: <https://clinicaltrials.gov/ct2/show/record/NCT03698318> [Accessed 11 August 2020].
- 511 Clinicaltrials.gov. Tocilizumab in Cardiac Transplantation. Trial ID: NCT03644667. 2018. Status: Recruiting. Available from: <https://clinicaltrials.gov/ct2/show/record/NCT03644667> [Accessed 11 August 2020].
- 512 Clinicaltrials.gov. Randomized Trial :Hemorrhoidal Pedicle Ligation vs Laser vs Open Hemorrhoidectomy. Trial ID: NCT03757728. 2018. Status: Invitation. Available from: <https://clinicaltrials.gov/ct2/show/record/NCT03757728> [Accessed 11 August 2020].
- 513 Clinicaltrials.gov. Spinal Anesthesia For Enhanced Recovery After Liver Surgery (SAFER-L). Trial ID: NCT03715517. 2018. Status: Recruiting. Available from: <https://clinicaltrials.gov/ct2/show/record/NCT03715517> [Accessed 11 August 2020].
- 514 Clinicaltrials.gov. Confirmatory Clinical Study of Oxiplex. Trial ID: NCT03433391. 2018. Status: Active- Not Recruiting. Available from: <https://clinicaltrials.gov/ct2/show/record/NCT03433391> [Accessed 11 August 2020].

- 515 Clinicaltrials.gov. Effects of Butyrate Enemas on Postoperative Intestinal Mobility Disorders in Hirschsprung's Disease (Buty-Hirsch). Trial ID: NCT03660176. 2018. Status: Not Yet Recruiting. Available from: <https://clinicaltrials.gov/ct2/show/record/NCT03660176> [Accessed 11 August 2020].
- 516 Clinicaltrials.gov. Evaluating the Safety and Pharmacokinetics of PC-1005 Administered Rectally to HIV-1 Seronegative Adults. Trial ID: NCT03408899. 2018. Status: Completed. Available from: <https://clinicaltrials.gov/ct2/show/record/NCT03408899> [Accessed 11 August 2020].
- 517 Clinicaltrials.gov. HIV-1-Gag Conserved-Element DNA Vaccine as Therapeutic Vaccination in HIV-Infected Persons With Viral Suppression on Antiretroviral Therapy. Trial ID: NCT03560258. 2018. Status: Active- Not Recruiting. Available from: <https://clinicaltrials.gov/ct2/show/record/NCT03560258> [Accessed 11 August 2020].
- 518 Clinicaltrials.gov. Snack Foods and Their Impact on Gastrointestinal Microbiology- Function and Symptoms (OptiGut). Trial ID: NCT03581812. 2018. Status: Completed. Available from: <https://clinicaltrials.gov/ct2/show/record/NCT03581812> [Accessed 11 August 2020].
- 519 Clinicaltrials.gov. Treatment of Irritable Bowel Syndrome With Diarrhoea Using Titrated Ondansetron Trial (TRITON). Trial ID: NCT03555188. 2018. Status: Recruiting. Available from: <https://clinicaltrials.gov/ct2/show/record/NCT03555188> [Accessed 11 August 2020].
- 520 Clinicaltrials.gov. RDD1609 as a Treatment for Idiopathic Pruritus Ani. Trial ID: NCT03757403. 2018. Status: Not Yet Recruiting. Available from: <https://clinicaltrials.gov/ct2/show/record/NCT03757403> [Accessed 11 August 2020].
- 521 Clinicaltrials.gov. The CalproSmartNOR Study - a New Clinical Tool for Monitoring Patients With Inflammatory Bowel Disease. Trial ID: NCT03486158. 2018. Status: Active- Not Recruiting. Available from: <https://clinicaltrials.gov/ct2/show/record/NCT03486158> [Accessed 11 August 2020].
- 522 Clinicaltrials.gov. The Role of PET/MRI in the Diagnosis and Treatment of Children and Adolescents With Inflammatory Bowel Diseases (PEDICAD). Trial ID: NCT03640637. 2018. Status: Not Yet Recruiting. Available from: <https://clinicaltrials.gov/ct2/show/record/NCT03640637> [Accessed 11 August 2020].
- 523 Clinicaltrials.gov. The Comparison Between the Biomarkers in Inflammatory Bowel Disease Patients and General Control Group. Trial ID: NCT03778918. 2018. Status: Recruiting. Available from: <https://clinicaltrials.gov/ct2/show/record/NCT03778918> [Accessed 11 August 2020].
- 524 Clinicaltrials.gov. Reactive vs. Proactive Pain Control in IBD (PAIN-Sparing). Trial ID: NCT03798405. 2018. Status: Recruiting. Available from: <https://clinicaltrials.gov/ct2/show/record/NCT03798405> [Accessed 11 August 2020].
- 525 Clinicaltrials.gov. Study of Probable Benefit of the Neuro-Spinal Scaffold in Subjects With Complete Thoracic AIS A Spinal Cord Injury as Compared to Standard of Care (INSPIRE 2). Trial ID: NCT03762655. 2018. Status: Recruiting. Available from: <https://clinicaltrials.gov/ct2/show/record/NCT03762655> [Accessed 11 August 2020].
- 526 Clinicaltrials.gov. Mindfulness Meditation in Treating Insomnia in Multiple Sclerosis. Trial ID: NCT03949296. 2018. Status: Completed. Available from: <https://clinicaltrials.gov/ct2/show/record/NCT03949296> [Accessed 11 August 2020].
- 527 Clinicaltrials.gov. Effects of Dietary Fibre in Irritable Bowel Syndrome (IBS). Trial ID: NCT03803319. 2018. Status: Completed. Available from: <https://clinicaltrials.gov/ct2/show/record/NCT03803319> [Accessed 11 August 2020].
- 528 Clinicaltrials.gov. Health Education Delivery Methods for a Low Fermentable Carbohydrate Diet in Patients With Functional Bowel Disorders. Trial ID: NCT03694223. 2018. Status: Completed. Available from: <https://clinicaltrials.gov/ct2/show/record/NCT03694223> [Accessed 11 August 2020].
- 529 Clinicaltrials.gov. Hydrogen Breath Test an Instrument to Predict Rifaximin-Response in Irritable Bowel Syndrome Predominant Diarrhea. Trial ID: NCT03729271. 2018. Status: Not Yet Recruiting. Available from: <https://clinicaltrials.gov/ct2/show/record/NCT03729271> [Accessed 11 August 2020].

- 530 Clinicaltrials.gov. Panaceo 'MED' for IBS (Irritable Bowel Syndrome) (PCeo-17). Trial ID: NCT03817645. 2018. Status: Recruiting. Available from: <https://clinicaltrials.gov/ct2/show/record/NCT03817645> [Accessed 11 August 2020].
- 531 Clinicaltrials.gov. 3030-401-002 ELX BAM Study. Trial ID: NCT03441581. 2018. Status: Active- Not Recruiting. Available from: <https://clinicaltrials.gov/ct2/show/record/NCT03441581> [Accessed 11 August 2020].
- 532 Clinicaltrials.gov. Trial of Carbon Ion Versus Photon Radiotherapy for Locally Advanced- Unresectable Pancreatic Cancer (CIPHER). Trial ID: NCT03536182. 2018. Status: Active- Not Recruiting. Available from: <https://clinicaltrials.gov/ct2/show/record/NCT03536182> [Accessed 11 August 2020].
- 533 Clinicaltrials.gov. Evaluation of Efficacy- Quality of Life and Cost Effectiveness of Short-course Radiotherapy Followed by Capecitabine Plus Oxaliplatin chemotherapy and TME for High-risk Rectal Cancer (ESCORT Trial). Trial ID: NCT03676517. 2018. Status: Not Yet Recruiting. Available from: <https://clinicaltrials.gov/ct2/show/record/NCT03676517> [Accessed 11 August 2020].
- 534 Clinicaltrials.gov. Innovative Imaging of Cerebrum and Muscle (iCAM) Repeatability Study (iCAM). Trial ID: NCT03548168. 2018. Status: Recruiting. Available from: <https://clinicaltrials.gov/ct2/show/record/NCT03548168> [Accessed 11 August 2020].
- 535 Clinicaltrials.gov. Spot-Scanning Based Hypofractionated Proton Therapy for Low and Intermediate Risk Prostate Cancer. Trial ID: NCT03740191. 2018. Status: Recruiting. Available from: <https://clinicaltrials.gov/ct2/show/record/NCT03740191> [Accessed 11 August 2020].
- 536 Clinicaltrials.gov. Study of Neratinib +Trastuzumab or Neratinib + Cetuximab in Patients With KRAS/NRAS/BRAF/PIK3CA Wild-Type Metastatic Colorectal Cancer by HER2 Status. Trial ID: NCT03457896. 2018. Status: Recruiting. Available from: <https://clinicaltrials.gov/ct2/show/record/NCT03457896> [Accessed 11 August 2020].
- 537 Clinicaltrials.gov. Muscle Wasting in the Critically Ill. Trial ID: NCT03770442. 2018. Status: Not Yet Recruiting. Available from: <https://clinicaltrials.gov/ct2/show/record/NCT03770442> [Accessed 11 August 2020].
- 538 Clinicaltrials.gov. TMQLB Versus TPVB for Acute Pain and Quality of Recovery After Laparoscopic Renal Surgery. Trial ID: NCT03414281. 2018. Status: Recruiting. Available from: <https://clinicaltrials.gov/ct2/show/record/NCT03414281> [Accessed 11 August 2020].
- 539 Clinicaltrials.gov. The Effects of 12 Weeks Supplementation With a B-vitamin and Herbal Supplement on Neurocognitive Function and Mood (MAST). Trial ID: NCT03482063. 2018. Status: Recruiting. Available from: <https://clinicaltrials.gov/ct2/show/record/NCT03482063> [Accessed 11 August 2020].
- 540 Clinicaltrials.gov. A Study to Determine Safety of Durvalumab After Sequential Chemo Radiation in Patients With Unresectable Stage III Non-Small Cell Lung Cancer. Trial ID: NCT03693300. 2018. Status: Recruiting. Available from: <https://clinicaltrials.gov/ct2/show/record/NCT03693300> [Accessed 11 August 2020].
- 541 Clinicaltrials.gov. The Comparison Between Traditional Laparoscopy-assisted Surgery and NOSES in Radical Resection of Colorectal Cancer. Trial ID: NCT03470142. 2018. Status: Recruiting. Available from: <https://clinicaltrials.gov/ct2/show/record/NCT03470142> [Accessed 11 August 2020].
- 542 Clinicaltrials.gov. Management and Outcomes of Congenital Anomalies in Low- Middle- and High-Income Countries. Trial ID: NCT03666767. 2018. Status: Completed. Available from: <https://clinicaltrials.gov/ct2/show/record/NCT03666767> [Accessed 11 August 2020].
- 543 Clinicaltrials.gov. Boost Brittle Bones Before Birth (BOOSTB4). Trial ID: NCT03706482. 2018. Status: Recruiting. Available from: <https://clinicaltrials.gov/ct2/show/record/NCT03706482> [Accessed 11 August 2020].
- 544 Clinicaltrials.gov. Pembrolizumab in Combination With Bevacizumab and Pegylated Liposomal Doxorubicin in Patients With Ovarian Cancer (PEMBOV). Trial ID: NCT03596281. 2018. Status: Not Yet Recruiting. Available from: <https://clinicaltrials.gov/ct2/show/record/NCT03596281> [Accessed 11 August 2020].

- 545 Clinicaltrials.gov. Avelumab and Talazoparib in Untreated Advanced Ovarian Cancer (JAVELIN OVARIAN PARP 100). Trial ID: NCT03642132. 2018. Status: Active- Not Recruiting. Available from: <https://clinicaltrials.gov/ct2/show/record/NCT03642132> [Accessed 11 August 2020].
- 546 Clinicaltrials.gov. European Trial on Enhanced DNA Repair Inhibition in Ovarian Cancer (EUDARIO). Trial ID: NCT03783949. 2018. Status: Recruiting. Available from: <https://clinicaltrials.gov/ct2/show/record/NCT03783949> [Accessed 11 August 2020].
- 547 Clinicaltrials.gov. CT-guided Ablation of the Ganglion Impar for Pelvic Tumors: Compare the Addition of Ketorolac or Dexamethasone. Trial ID: NCT03789227. 2018. Status: Recruiting. Available from: <https://clinicaltrials.gov/ct2/show/record/NCT03789227> [Accessed 11 August 2020].
- 548 Clinicaltrials.gov. The Effect of Perioperative Intravenous Lidocaine Infusion on Opioid Consumption After Lumbar Spine Surgery. Trial ID: NCT03624985. 2018. Status: Recruiting. Available from: <https://clinicaltrials.gov/ct2/show/record/NCT03624985> [Accessed 11 August 2020].
- 549 Clinicaltrials.gov. Safety and Tolerability of SYN1618 in Healthy Adult Volunteers and Adult Subjects With Phenylketonuria (PKU). Trial ID: NCT03516487. 2018. Status: Completed. Available from: <https://clinicaltrials.gov/ct2/show/record/NCT03516487> [Accessed 11 August 2020].
- 550 Clinicaltrials.gov. Initiative to Minimize Disparities in Postoperative Prostate Cancer Care. Trial ID: NCT03755492. 2018. Status: Recruiting. Available from: <https://clinicaltrials.gov/ct2/show/record/NCT03755492> [Accessed 11 August 2020].
- 551 Clinicaltrials.gov. Effect of SmtO2 Guided Care on PONV (iMODIPONV) (iMODIPONV). Trial ID: NCT03641625. 2018. Status: Completed. Available from: <https://clinicaltrials.gov/ct2/show/record/NCT03641625> [Accessed 11 August 2020].
- 552 Clinicaltrials.gov. Primary Ovarian Insufficiency: Phenotype and Optimal Treatment. Trial ID: NCT03568708. 2018. Status: Recruiting. Available from: <https://clinicaltrials.gov/ct2/show/record/NCT03568708> [Accessed 11 August 2020].
- 553 Clinicaltrials.gov. Clinical and Dynamic Floor MRI Evaluation Before and After Prolapse Surgery. Trial ID: NCT03400007. 2018. Status: Recruiting. Available from: <https://clinicaltrials.gov/ct2/show/record/NCT03400007> [Accessed 11 August 2020].
- 554 Clinicaltrials.gov. Assisted Promontofixation Using Glue Versus Promontofixation Using Threads (PROCOL) (PROCOL). Trial ID: NCT03624764. 2018. Status: Active- Not Recruiting. Available from: <https://clinicaltrials.gov/ct2/show/record/NCT03624764> [Accessed 11 August 2020].
- 555 Clinicaltrials.gov. Fluciclovine F18 or Ga68-PSMA PET/CT to Enhance Prostate Cancer Outcomes. Trial ID: NCT03762759. 2018. Status: Recruiting. Available from: <https://clinicaltrials.gov/ct2/show/record/NCT03762759> [Accessed 11 August 2020].
- 556 Clinicaltrials.gov. Efficacy of a Couple-Focused mHealth Symptom Self-management Program. Trial ID: NCT03489057. 2018. Status: Recruiting. Available from: <https://clinicaltrials.gov/ct2/show/record/NCT03489057> [Accessed 11 August 2020].
- 557 Clinicaltrials.gov. A Prospective Comparative Study of Outcomes With Proton and Photon Radiation in Prostate Cancer (COMPPARE). Trial ID: NCT03561220. 2018. Status: Recruiting. Available from: <https://clinicaltrials.gov/ct2/show/record/NCT03561220> [Accessed 11 August 2020].
- 558 Clinicaltrials.gov. Efficacy Evaluation of Focused HIFU (High Intensity Focused Ultrasound) Therapy in Patients With Localized Intermediate Risk Prostate Cancer (FOCALE). Trial ID: NCT03568188. 2018. Status: Recruiting. Available from: <https://clinicaltrials.gov/ct2/show/record/NCT03568188> [Accessed 11 August 2020].
- 559 Clinicaltrials.gov. Prostate Cancer - Patient Empowerment Program (PC-PEP). Trial ID: NCT03660085. 2018. Status: Recruiting. Available from: <https://clinicaltrials.gov/ct2/show/record/NCT03660085> [Accessed 11 August 2020].
- 560 Clinicaltrials.gov. Improving Quality of Life of Prostate Cancer Survivors With Androgen Deficiency. Trial ID: NCT03716739. 2018. Status: Recruiting. Available from: <https://clinicaltrials.gov/ct2/show/record/NCT03716739> [Accessed 11 August 2020].

- 561 Clinicaltrials.gov. A Prospective- Randomized Trial Comparing Office-based MR-guided Prostate Biopsy Approaches. Trial ID: NCT03632655. 2018. Status: Recruiting. Available from: <https://clinicaltrials.gov/ct2/show/record/NCT03632655> [Accessed 11 August 2020].
- 562 Clinicaltrials.gov. Cosmetic Appeal- HRQoL and Effectiveness of Simple and Pseudotesticular Techniques of Orchidectomy in Prostate Cancer (TEPSO). Trial ID: NCT03744494. 2018. Status: Completed. Available from: <https://clinicaltrials.gov/ct2/show/record/NCT03744494> [Accessed 11 August 2020].
- 563 Clinicaltrials.gov. Impact of Perioperative Analgesia in Prostatectomy Patients on Early Quality of Recovery (SPITALIDO) (SPITALIDO). Trial ID: NCT03618693. 2018. Status: Recruiting. Available from: <https://clinicaltrials.gov/ct2/show/record/NCT03618693> [Accessed 11 August 2020].
- 564 Clinicaltrials.gov. Stereotactic Body Radiation Therapy in Treating Patients With Localized Prostate Cancer That Have Undergone Surgery. Trial ID: NCT03541850. 2018. Status: Recruiting. Available from: <https://clinicaltrials.gov/ct2/show/record/NCT03541850> [Accessed 11 August 2020].
- 565 Clinicaltrials.gov. Body Composition of People After a Stroke. Trial ID: NCT03722602. 2018. Status: Completed. Available from: <https://clinicaltrials.gov/ct2/show/record/NCT03722602> [Accessed 11 August 2020].
- 566 Clinicaltrials.gov. Trimodal Therapy Plus Atezolizumab in Muscle-invasive Bladder Cancer. Trial ID: NCT03620435. 2018. Status: Recruiting. Available from: <https://clinicaltrials.gov/ct2/show/record/NCT03620435> [Accessed 11 August 2020].
- 567 Clinicaltrials.gov. Efficacy- Safety- and Tolerability of ATM-AVI in the Treatment of Serious Infection Due to MBL-producing Gram-negative Bacteria. Trial ID: NCT03580044. 2018. Status: Not Yet Recruiting. Available from: <https://clinicaltrials.gov/ct2/show/record/NCT03580044> [Accessed 11 August 2020].
- 568 Clinicaltrials.gov. Therapeutic Approaches to Malnutrition Enteropathy (TAME). Trial ID: NCT03716115. 2018. Status: Not Yet Recruiting. Available from: <https://clinicaltrials.gov/ct2/show/record/NCT03716115> [Accessed 11 August 2020].
- 569 Clinicaltrials.gov. Analysis of the Microbiota and STEMI. Trial ID: NCT03439592. 2018. Status: Other. Available from: <https://clinicaltrials.gov/ct2/show/record/NCT03439592> [Accessed 11 August 2020].
- 570 Clinicaltrials.gov. To Evaluate the Use of Bioresorbable Tephaflex Sling for Stress Urinary Incontinence (Tephaflex). Trial ID: NCT03673488. 2018. Status: Recruiting. Available from: <https://clinicaltrials.gov/ct2/show/record/NCT03673488> [Accessed 11 August 2020].
- 571 Clinicaltrials.gov. Assisted Rehabilitation Care During Post-stroke mANaGement: fEasibiLity Assessment (ARCANGEL). Trial ID: NCT03787433. 2018. Status: Active- Not Recruiting. Available from: <https://clinicaltrials.gov/ct2/show/record/NCT03787433> [Accessed 11 August 2020].
- 572 Clinicaltrials.gov. The Effect of Exercise by Mechanical Hippotherapy Device on Postural Stability and Balance in Stroke. Trial ID: NCT03528993. 2018. Status: Completed. Available from: <https://clinicaltrials.gov/ct2/show/record/NCT03528993> [Accessed 11 August 2020].
- 573 Clinicaltrials.gov. Evaluation of the GORE EXCLUDER Thoracoabdominal Branch Endoprosthesis in the Treatment of Thoracoabdominal and Pararenal Aortic Aneurysms (TAMBE). Trial ID: NCT03728985. 2018. Status: Recruiting. Available from: <https://clinicaltrials.gov/ct2/show/record/NCT03728985> [Accessed 11 August 2020].
- 574 Clinicaltrials.gov. Quality of Life After Transanal Endoscopic Microsurgery (TEM) (QoLTEM). Trial ID: NCT03675243. 2018. Status: Recruiting. Available from: <https://clinicaltrials.gov/ct2/show/record/NCT03675243> [Accessed 11 August 2020].
- 575 Clinicaltrials.gov. Brain and Gut Plasticity in Mild TBI Following Growth Hormone Therapy. Trial ID: NCT03554265. 2018. Status: Recruiting. Available from: <https://clinicaltrials.gov/ct2/show/record/NCT03554265> [Accessed 11 August 2020].

- 576 Clinicaltrials.gov. Efficacy and Safety of Sotagliflozin Versus Placebo in Chinese Patients With Type 2 Diabetes Mellitus Not Adequately Controlled by Metformin With or Without Sulfonyleurea. Trial ID: NCT03761134. 2018. Status: Recruiting. Available from: <https://clinicaltrials.gov/ct2/show/record/NCT03761134> [Accessed 11 August 2020].
- 577 Clinicaltrials.gov. Pro-active Fecal Calprotectin Monitoring PROMOTE-UC. Trial ID: NCT03549988. 2018. Status: Recruiting. Available from: <https://clinicaltrials.gov/ct2/show/record/NCT03549988> [Accessed 11 August 2020].
- 578 Clinicaltrials.gov. Short or Long Interval to Ileostomy Reversal After Ileal Pouch Surgery (SLIRPS). Trial ID: NCT03587519. 2018. Status: Invitation. Available from: <https://clinicaltrials.gov/ct2/show/record/NCT03587519> [Accessed 11 August 2020].
- 579 Clinicaltrials.gov. Multi-center Acute Severe Ulcerative Colitis Cohort Study (MASCC) (MASCC). Trial ID: NCT03669822. 2018. Status: Recruiting. Available from: <https://clinicaltrials.gov/ct2/show/record/NCT03669822> [Accessed 11 August 2020].
- 580 Clinicaltrials.gov. EFFICACI : EFFicacy of Intravenous Infliximab Versus Vedolizumab After Failure of subCutaneous Anti-TNF in Patients With UlCerative Colitis (EFFICACI). Trial ID: NCT03679546. 2018. Status: Recruiting. Available from: <https://clinicaltrials.gov/ct2/show/record/NCT03679546> [Accessed 11 August 2020].
- 581 Clinicaltrials.gov. Safety and Efficacy of PBF-677 in Ulcerative Colitis Patients (ADENOIBD). Trial ID: NCT03773952. 2018. Status: Recruiting. Available from: <https://clinicaltrials.gov/ct2/show/record/NCT03773952> [Accessed 11 August 2020].
- 582 Clinicaltrials.gov. A Study of the Efficacy and Safety of Upadacitinib (ABT-494) in Participants With Moderately to Severely Active Ulcerative Colitis (U-Accomplish). Trial ID: NCT03653026. 2018. Status: Recruiting. Available from: <https://clinicaltrials.gov/ct2/show/record/NCT03653026> [Accessed 11 August 2020].
- 583 Clinicaltrials.gov. Effects of Transcutaneous Perineal Stimulation Versus Anal Stimulation. Trial ID: NCT03587402. 2018. Status: Active- Not Recruiting. Available from: <https://clinicaltrials.gov/ct2/show/record/NCT03587402> [Accessed 11 August 2020].
- 584 Clinicaltrials.gov. Canadian Experience With Contiform Intravaginal Device For The Treatment Of Stress Incontinence. Trial ID: NCT03614611. 2018. Status: Recruiting. Available from: <https://clinicaltrials.gov/ct2/show/record/NCT03614611> [Accessed 11 August 2020].
- 585 Clinicaltrials.gov. Gentamicin Bladder Instillations to Prevent Urinary Tract Infections in Patients With Spinal Cord Injury. Trial ID: NCT03503513. 2018. Status: Recruiting. Available from: <https://clinicaltrials.gov/ct2/show/record/NCT03503513> [Accessed 11 August 2020].
- 586 Clinicaltrials.gov. Vaginal Estrogen on Postpartum Atrophy- Perineal Pain- and Sexual Function. Trial ID: NCT03493126. 2018. Status: Recruiting. Available from: <https://clinicaltrials.gov/ct2/show/record/NCT03493126> [Accessed 11 August 2020].
- 587 Clinicaltrials.gov. Sacrocolpopexy With Posterior Repair Obstructed Defecation Symptoms. Trial ID: NCT03658395. 2018. Status: Recruiting. Available from: <https://clinicaltrials.gov/ct2/show/record/NCT03658395> [Accessed 11 August 2020].
- 588 Clinicaltrials.gov. Restorelle Y Mesh vs. Vertessa Lite Y Mesh for Laparoscopic and Robotic-assisted Laparoscopic Sacrocolpopexy (Lite-Y). Trial ID: NCT03681223. 2018. Status: Recruiting. Available from: <https://clinicaltrials.gov/ct2/show/record/NCT03681223> [Accessed 11 August 2020].
- 589 Clinicaltrials.gov. Analysis of Volatile Organic Compounds in the Exhaled Air in Inflammatory Bowel Disease. Trial ID: NCT03414580. 2018. Status: Recruiting. Available from: <https://clinicaltrials.gov/ct2/show/record/NCT03414580> [Accessed 11 August 2020].
- 590 Clinicaltrials.gov. Bladder Antimuscarinic Medication and Accidental Bowel Leakage (BAMA). Trial ID: NCT03543566. 2018. Status: Completed. Available from: <https://clinicaltrials.gov/ct2/show/record/NCT03543566> [Accessed 11 August 2020].
- 591 Clinicaltrials.gov. What is the Prevalence of Female Pelvic Floor Disorders in Minnesota? Trial ID: NCT03536221. 2018. Status: Completed. Available from: <https://clinicaltrials.gov/ct2/show/record/NCT03536221> [Accessed 11 August 2020].

- 592 Clinicaltrials.gov. Histopathological Comparison Between Superficial Pressure Ulcers and Incontinence-associated Dermatitis. Trial ID: NCT03685929. 2018. Status: Not Yet Recruiting. Available from: <https://clinicaltrials.gov/ct2/show/record/NCT03685929> [Accessed 11 August 2020].
- 593 Clinicaltrials.gov. Vaginally Assisted Laparoscopic Hysteropexy Versus Vaginal Hysterectomy. Trial ID: NCT03436147. 2018. Status: Other. Available from: <https://clinicaltrials.gov/ct2/show/record/NCT03436147> [Accessed 11 August 2020].
- 594 Clinicaltrials.gov. Laparoscopic Lateral Suspension With Mesh & Sacrocervicopexy for the Treatment of Uterine Prolapse. Trial ID: NCT03421457. 2018. Status: Completed. Available from: <https://clinicaltrials.gov/ct2/show/record/NCT03421457> [Accessed 11 August 2020].
- 595 Clinicaltrials.gov. Different Types of Suture for Sacral Colpopexy. Trial ID: NCT03582410. 2018. Status: Completed. Available from: <https://clinicaltrials.gov/ct2/show/record/NCT03582410> [Accessed 11 August 2020].
- 596 Clinicaltrials.gov. Total Laparoscopic Hysterectomy With Sacrocolpopexy Versus Total Laparoscopic Hysterectomy With Lateral Suspension in Patients With Pelvic Organ Prolapse. Trial ID: NCT03722563. 2018. Status: Recruiting. Available from: <https://clinicaltrials.gov/ct2/show/record/NCT03722563> [Accessed 11 August 2020].
- 597 Clinicaltrials.gov. Nonabsorbable Versus Absorbable Sutures for Anterior Colporrhaphy. Trial ID: NCT03736811. 2018. Status: Recruiting. Available from: <https://clinicaltrials.gov/ct2/show/record/NCT03736811> [Accessed 11 August 2020].
- 598 Clinicaltrials.gov. Laparoscopic Hysterectomy With Vaginal Vault Suspension to the Uterosacral Ligaments for Stage II-III Pelvic Organ Prolapse. (LULS-1). Trial ID: NCT03553511. 2018. Status: Not Yet Recruiting. Available from: <https://clinicaltrials.gov/ct2/show/record/NCT03553511> [Accessed 11 August 2020].
- 599 Clinicaltrials.gov. Pelvic Floor Dysfunction and Its Influence on Body Image and Sexual Function (PFD-BI). Trial ID: NCT03591393. 2018. Status: Recruiting. Available from: <https://clinicaltrials.gov/ct2/show/record/NCT03591393> [Accessed 11 August 2020].
- 600 EU Clinical Trials Register. Double-blind- randomized- placebo-controlled- phase III study comparing norursodeoxycholic acid capsules with placebo in the treatment of primary sclerosing cholangitis tude de phase III randomis e- contre placebo- en double aveugle comparant des g lules d'acide nor-ursod soxycholique au placebo dans le traitement de la cholangite scl rosante primitive. Trial ID: 2016-003367-19/FR. 2018. Status: Ongoing. Available from: <https://www.clinicaltrialsregister.eu/ctr-search/trial/2016-003367-19/FR> [Accessed 11 August 2020].
- 601 EU Clinical Trials Register. A Randomized- Double-blind- Placebo-controlled- Parallel-group- 12-week Proof-of-Concept (PoC) Study to Assess the Efficacy- Safety- and Tolerability of SAR440340/REGN3500 and the Coadministration of SAR440340 and Dupilumab in Patients with Moderate-to-severe Asthma who are not well Controlled on Inhaled Corticosteroid (ICS) plus Long-acting 2 Adrenergic Agonist (LABA) Therapy. Trial ID: 2017-003289-29/PL. 2018. Status: Ongoing. Available from: <https://www.clinicaltrialsregister.eu/ctr-search/trial/2017-003289-29/PL> [Accessed 11 August 2020].
- 602 EU Clinical Trials Register. A Phase III- Randomized- Double-Blind- Multicenter- Comparative Study to Determine the Efficacy and Safety of Cefepime-Tazobactam vs. Meropenem followed by Optional Oral Therapy in the Treatment of Complicated Urinary Tract Infection or Acute Pyelonephritis in Adults Randomizovan - dvojit zaslepen - multicentrick - srovn vac klinick hodnocen f ze III- zji uj c innost a bezpe nost p pravku Cefepime-Tazobactam ve srovn n s Meropenem- s n slednou volitelnou peror ln terapi - p i l b komplikovan infekce mo ov ch cest nebo akutn pyelonefritidy dosp l ch; Phase III study of cefepime-tazobactam (FEP-TAZ) in cUTI or AP. Trial ID: 2017-005117-31/CZ. 2018. Status: Completed. Available from: <https://www.clinicaltrialsregister.eu/ctr-search/trial/2017-005117-31/CZ> [Accessed 11 August 2020].
- 603 EU Clinical Trials Register. Evaluate the Safety and Efficacy of ALLN-177 in Patients with Enteric Hyperoxaluria: A Phase III Randomized- Placebo-Controlled Study. Trial ID: 2017-004352-33/GB. 2018. Status: Completed. Available from: <https://www.clinicaltrialsregister.eu/ctr-search/trial/2017-004352-33/GB> [Accessed 11 August 2020].

- 604 EU Clinical Trials Register. Pilot Study of ALLN-177 in Adult and Pediatric Subjects Aged 12 Years or Older with Enteric or Primary Hyperoxaluria and Hyperoxalemia. Trial ID: 2017-003547-38/GB. 2018. Status: Ongoing. Available from: <https://www.clinicaltrialsregister.eu/ctr-search/trial/2017-003547-38/GB> [Accessed 11 August 2020].
- 605 EU Clinical Trials Register. A Phase IIa (proof of concept)- randomized- double blind- placebo controlled- multicenter clinical trial to evaluate the safety and efficacy of oral treatment with PBF-677 in patients with mild to moderate ulcerative colitis. Ensayo clínico multicéntrico de fase IIa (prueba de concepto) aleatorizado- con doble enmascaramiento y controlado con placebo para evaluar la seguridad y eficacia del tratamiento oral con PBF-677 en pacientes con colitis ulcerosa de leve a moderada. Trial ID: 2017-003228-54/ES. 2018. Status: Ongoing. Available from: <https://www.clinicaltrialsregister.eu/ctr-search/trial/2017-003228-54/ES> [Accessed 11 August 2020].
- 606 EU Clinical Trials Register. Comparison of ambulatory glucose profile prior to and during pancreatic enzyme replacement therapy in patients with diabetes and pancreatic exocrine insufficiency: a single-arm phase IV trial; Pancreatic replacement therapy and glycaemic control in diabetes v1.0. Trial ID: 2017-001227-45/GB. 2018. Status: Ongoing. Available from: <https://www.clinicaltrialsregister.eu/ctr-search/trial/2017-001227-45/GB> [Accessed 11 August 2020].
- 607 EU Clinical Trials Register. EFFICACI: Efficacy of intravenous Infliximab versus vedolizumab after failure of subcutaneous Anti-TNF in patients with Ulcerative colitis: A double blinded Randomized Clinical Trial. EFFICACI: Efficacité de l'Infliximab versus le vedolizumab après échec d'un traitement par anti-TNF sous-cutané chez des patients atteints de rectocolite hémorragique: essai clinique randomisé contrôlé en double aveugle; EFFICACI EFFICACI. Trial ID: 2018-002673-21/FR. 2018. Status: Ongoing. Available from: <https://www.clinicaltrialsregister.eu/ctr-search/trial/2018-002673-21/FR> [Accessed 11 August 2020].
- 608 EU Clinical Trials Register. Investigation of the Faecal loss of Vedolizumab and its role in influencing serum drug levels- Outcomes and Response in ulcerative colitis; FAVOUR. Trial ID: 2018-002794-21/GB. 2018. Status: Ongoing. Available from: <https://www.clinicaltrialsregister.eu/ctr-search/trial/2018-002794-21/GB> [Accessed 11 August 2020].
- 609 ISRCTN Registry. Bowel scope screening: interventions to increase uptake in Yorkshire. Trial ID: ISRCTN16252122. 2018. Status: Completed. Available from: <http://www.isrctn.com/ISRCTN16252122> [Accessed 11 August 2020].
- 610 ISRCTN Registry. Steps towards increasing bowel cancer screening uptake: a randomised controlled trial. Trial ID: ISRCTN39941749. 2018. Status: Completed. Available from: <http://www.isrctn.com/ISRCTN39941749> [Accessed 11 August 2020].
- 611 ISRCTN Registry. Memory Intervention with Nutrition for Dementia (re-MIND). Trial ID: ISRCTN11892249. 2018. Status: Recruiting. Available from: <http://www.isrctn.com/ISRCTN11892249> [Accessed 11 August 2020].
- 612 ISRCTN Registry. The BD Odon Device for assisted vaginal birth. Trial ID: ISRCTN10203171. 2018. Status: Completed. Available from: <http://www.isrctn.com/ISRCTN10203171> [Accessed 11 August 2020].
- 613 ISRCTN Registry. The treatment of chronic anal fissures with fissure excision and Botulinum Toxin Type A injection. Trial ID: ISRCTN97413456. 2018. Status: Completed. Available from: <http://www.isrctn.com/ISRCTN97413456> [Accessed 11 August 2020].
- 614 ISRCTN Registry. Encouraging compliance with bowel and cervical cancer screening using behavioural nudges. Trial ID: ISRCTN94361793. 2018. Status: Completed. Available from: <http://www.isrctn.com/ISRCTN94361793> [Accessed 11 August 2020].
- 615 ISRCTN Registry. Recovery study of *L. casei* DG (Enterolactis bevilabe) in healthy children. Trial ID: ISRCTN61742259. 2018. Status: Completed. Available from: <http://www.isrctn.com/ISRCTN61742259> [Accessed 11 August 2020].
- 616 ISRCTN Registry. Anal Sphincter in patients with faecal incontinence: a multicentre prospective evaluation in the UK. Trial ID: ISRCTN61603070. 2018. Status: Recruiting. Available from: <http://www.isrctn.com/ISRCTN61603070> [Accessed 11 August 2020].
- 617 ISRCTN Registry. Understanding cauda equina syndrome (UCES). Trial ID: ISRCTN16828522. 2018. Status: Recruiting. Available from: <http://www.isrctn.com/ISRCTN16828522> [Accessed 11 August 2020].
- 618 Thai Clinical Trials Registry (TCTR). Randomized Controlled Trial: ERAS Program on Colorectal Cancer Surgery Decrease Length of Hospital Stay. Trial ID: TCTR20180129009. 2018. Status: Active- Not Recruiting. Available from:

- <http://www.clinicaltrials.in.th/index.php?tp=regtrials&menu=trials&smenu=fulltext&task=search&task2=view1&id=3184> [Accessed 11 August 2020].
- 619 UMIN Clinical Trials Registry (UMIN-CTR). The efficacy of Daikenchuto (TJ-100) on abdominal discomfort (pain) in patients with defecation disorders: a retrospective study. Trial ID: UMIN000031475. 2018. Status: Active- Not Recruiting. Available from: [https://upload.umin.ac.jp/cgi-open-bin/ctr\\_e/ctr\\_view.cgi?recptno=R000035929](https://upload.umin.ac.jp/cgi-open-bin/ctr_e/ctr_view.cgi?recptno=R000035929) [Accessed 11 August 2020].
- 620 UMIN Clinical Trials Registry (UMIN-CTR). Disorder of defecation accompanying sexual cycle of Japanese female in twenties. Trial ID: UMIN000033241. 2018. Status: Not Yet Recruiting. Available from: [https://upload.umin.ac.jp/cgi-open-bin/ctr\\_e/ctr\\_view.cgi?recptno=R000037900](https://upload.umin.ac.jp/cgi-open-bin/ctr_e/ctr_view.cgi?recptno=R000037900) [Accessed 11 August 2020].
- 621 UMIN Clinical Trials Registry (UMIN-CTR). The effect of gum chewing and/or early oral intake on bowel function recovery. Trial ID: UMIN000032062. 2018. Status: Recruiting. Available from: [https://upload.umin.ac.jp/cgi-open-bin/ctr\\_e/ctr\\_view.cgi?recptno=R000036575](https://upload.umin.ac.jp/cgi-open-bin/ctr_e/ctr_view.cgi?recptno=R000036575) [Accessed 11 August 2020].
- 622 UMIN Clinical Trials Registry (UMIN-CTR). A study on colonic decompression as bridge to surgery for obstructive colon cancer. Trial ID: UMIN000033931. 2018. Status: Recruiting. Available from: [https://upload.umin.ac.jp/cgi-open-bin/ctr\\_e/ctr\\_view.cgi?recptno=R000038697](https://upload.umin.ac.jp/cgi-open-bin/ctr_e/ctr_view.cgi?recptno=R000038697) [Accessed 11 August 2020].
- 623 UMIN Clinical Trials Registry (UMIN-CTR). improving oral function and soiling. Trial ID: UMIN000033543. 2018. Status: Not Yet Recruiting. Available from: [https://upload.umin.ac.jp/cgi-open-bin/ctr\\_e/ctr\\_view.cgi?recptno=R000038249](https://upload.umin.ac.jp/cgi-open-bin/ctr_e/ctr_view.cgi?recptno=R000038249) [Accessed 11 August 2020].
- 624 UMIN Clinical Trials Registry (UMIN-CTR). Effects of Lactobacillus brevis KB290 intake on bowel movement and intestinal environment: a systematic review with meta-analysis. Trial ID: UMIN000029963. 2018. Status: Not Yet Recruiting. Available from: [https://upload.umin.ac.jp/cgi-open-bin/ctr\\_e/ctr\\_view.cgi?recptno=R000034227](https://upload.umin.ac.jp/cgi-open-bin/ctr_e/ctr_view.cgi?recptno=R000034227) [Accessed 11 August 2020].
- 625 Australian New Zealand Clinical Trials Registry (ANZCTR). FIT for purpose: personalised surveillance colonoscopy for people at increased risk of colorectal cancer. Trial ID: ACTRN12619001743156. 2019. Status: Not Yet Recruiting. Available from: <https://www.anzctr.org.au/Trial/Registration/TrialReview.aspx?id=377876&isReview=true> [Accessed 11 August 2020].
- 626 Australian New Zealand Clinical Trials Registry (ANZCTR). Microbiome in Active and Sedentary Older People (MASOP) Study. Trial ID: ACTRN12619000164190. 2019. Status: Not Yet Recruiting. Available from: <https://www.anzctr.org.au/Trial/Registration/TrialReview.aspx?id=376811&isReview=true> [Accessed 11 August 2020].
- 627 Australian New Zealand Clinical Trials Registry (ANZCTR). Detection of Mycobacterium avium ssp paratuberculosis (MAP) forms in patients with Crohn s disease and controls - a prospective clinical study. Trial ID: ACTRN12619000940178. 2019. Status: Not Yet Recruiting. Available from: <https://www.anzctr.org.au/Trial/Registration/TrialReview.aspx?id=377567&isReview=true> [Accessed 11 August 2020].
- 628 Australian New Zealand Clinical Trials Registry (ANZCTR). What is the effect of increasing dietary resistant starch on gut health and immunity in HIV-positive adults in India and is a feeding trial feasible? Trial ID: ACTRN12619000739112. 2019. Status: Not Yet Recruiting. Available from: <https://www.anzctr.org.au/Trial/Registration/TrialReview.aspx?id=377554&isReview=true> [Accessed 11 August 2020].
- 629 Australian New Zealand Clinical Trials Registry (ANZCTR). Effects on disease activity- self-reported symptoms and microbiota profile in patients with inflammatory bowel disease of a modified anti-inflammatory diet. Trial ID: ACTRN12619001500145p. 2019. Status: Not Yet Recruiting. Available from: <https://www.anzctr.org.au/Trial/Registration/TrialReview.aspx?id=378483&isReview=true> [Accessed 11 August 2020].
- 630 Australian New Zealand Clinical Trials Registry (ANZCTR). A validation trial of IBD.Mindovergut.com: A brief psychological online resilience program for individuals living with Inflammatory Bowel Disease (IBD) and low-to-moderate psychological distress. Trial ID: ACTRN12619001697178p. 2019. Status: Not Yet Recruiting. Available from: <https://www.anzctr.org.au/Trial/Registration/TrialReview.aspx?id=378828&isReview=true> [Accessed 11 August 2020].

- 631 Australian New Zealand Clinical Trials Registry (ANZCTR). A validation trial of IBS.Mindovergut.com: A brief psychological online resilience program for individuals living with Irritable Bowel Syndrome (IBS) and low-to-moderate psychological distress. Trial ID: ACTRN12619001640190p. 2019. Status: Not Yet Recruiting. Available from: <https://www.anzctr.org.au/Trial/Registration/TrialReview.aspx?id=378663&isReview=true> [Accessed 11 August 2020].
- 632 Australian New Zealand Clinical Trials Registry (ANZCTR). The Role of Fistula-tract Laser Closure in the Management of Perianal Fistula (FiLaC). Trial ID: ACTRN12619000493145p. 2019. Status: Not Yet Recruiting. Available from: <https://www.anzctr.org.au/Trial/Registration/TrialReview.aspx?id=377177&isReview=true> [Accessed 11 August 2020].
- 633 Australian New Zealand Clinical Trials Registry (ANZCTR). Post-haemorrhoidectomy Pain and Metronidazole Trial. Trial ID: ACTRN12619000735156. 2019. Status: Completed. Available from: <https://www.anzctr.org.au/Trial/Registration/TrialReview.aspx?id=377543&isReview=true> [Accessed 11 August 2020].
- 634 Australian New Zealand Clinical Trials Registry (ANZCTR). Impact of a New Zealand berry fruit product on lung health and immunological status of individuals living in urban China. Trial ID: ACTRN12619001736134p. 2019. Status: Not Yet Recruiting. Available from: <https://www.anzctr.org.au/Trial/Registration/TrialReview.aspx?id=378795&isReview=true> [Accessed 11 August 2020].
- 635 Australian New Zealand Clinical Trials Registry (ANZCTR). Do foam dressings prevent pressure sores? Trial ID: ACTRN12619000763145p. 2019. Status: Not Yet Recruiting. Available from: <https://www.anzctr.org.au/Trial/Registration/TrialReview.aspx?id=377447&isReview=true> [Accessed 11 August 2020].
- 636 Australian New Zealand Clinical Trials Registry (ANZCTR). COLONiC: Consequences of OLive Oil replacemenNt on ulcerative Colitis. Trial ID: ACTRN12619000150145. 2019. Status: Not Yet Recruiting. Available from: <https://www.anzctr.org.au/Trial/Registration/TrialReview.aspx?id=375208&isReview=true> [Accessed 11 August 2020].
- 637 Australian New Zealand Clinical Trials Registry (ANZCTR). Lyophilised Oral Faecal Microbiota Transplantation in the Management of Ulcerative Colitis -(LOTUS Study). Trial ID: ACTRN12619000611123. 2019. Status: Not Yet Recruiting. Available from: <https://www.anzctr.org.au/Trial/Registration/TrialReview.aspx?id=377325&isReview=true> [Accessed 11 August 2020].
- 638 Australian New Zealand Clinical Trials Registry (ANZCTR). Effectiveness of Yoga and Pilates Training for Urinary Incontinence in Elderly Women: A Clinical Trial. Trial ID: ACTRN12619000784112. 2019. Status: Not Yet Recruiting. Available from: <https://www.anzctr.org.au/Trial/Registration/TrialReview.aspx?id=377388&isReview=true> [Accessed 11 August 2020].
- 639 Clinical Research Information Service (CRIS). Safety and Efficacy of LOw Volum bowel preparation for Elderly. Trial ID: KCT0004224. 2019. Status: Recruiting. Available from: [https://cris.nih.go.kr/cris/en/search/search\\_result\\_st01.jsp?seq=15820](https://cris.nih.go.kr/cris/en/search/search_result_st01.jsp?seq=15820) [Accessed 11 August 2020].
- 640 Clinical Research Information Service (CRIS). A Clinical Trial to Evaluate the Efficacy and Safety of Anti-adhesive Agent INTERGUARD in Abdominal Surgery. Trial ID: KCT0005062. 2019. Status: Recruiting. Available from: [https://cris.nih.go.kr/cris/en/search/search\\_result\\_st01.jsp?seq=14314](https://cris.nih.go.kr/cris/en/search/search_result_st01.jsp?seq=14314) [Accessed 11 August 2020].
- 641 Clinical Trials Registry - India (CTRI). Comparing a new generation airway device called Baska mask with a normal tube that passes through the windpipe in preventing the blood trickling into the windpipe and contaminating the airway during elective nasal surgeries. Trial ID: CTRI/2019/06/019724. 2019. Status: Not Available. Available from: <http://ctri.nic.in/Clinicaltrials/pmaindet2.php?trialid=33928> [Accessed 11 August 2020].
- 642 Clinical Trials Registry - India (CTRI). Jirakadyarishta in the treatment of Grahani (Irritable Bowel Syndrome). Trial ID: CTRI/2019/08/020763. 2019. Status: Not Available. Available from: <http://ctri.nic.in/Clinicaltrials/pmaindet2.php?trialid=35637> [Accessed 11 August 2020].
- 643 Clinical Trials Registry - India (CTRI). A clinical trial comparing two different surgeries done for the treatment of hemorrhoidectomy. Trial ID: CTRI/2019/08/020781. 2019. Status: Not Available. Available from: <http://ctri.nic.in/Clinicaltrials/pmaindet2.php?trialid=32068> [Accessed 11 August 2020].

- 644 Clinical Trials Registry - India (CTRI). Use Of Parpatadyarishta in the management of Prostate growth related urinary incontinence. Trial ID: CTRI/2019/05/019230. 2019. Status: Not Available. Available from: <http://ctri.nic.in/Clinicaltrials/pmaindet2.php?trialid=33890> [Accessed 11 August 2020].
- 645 Clinical Trials Registry - India (CTRI). Bowel training through bowel wash procedure and bowel maintenance schedule. Trial ID: CTRI/2019/07/020287. 2019. Status: Not Available. Available from: <http://ctri.nic.in/Clinicaltrials/pmaindet2.php?trialid=34095> [Accessed 11 August 2020].
- 646 Clinical Trials Registry - India (CTRI). A Study to Determine the Effect of AztreonamAvibactam for the Treatment of Serious Infections Due to Resistant (MBLproducing) Gram Negative Bacteria. Trial ID: CTRI/2019/06/019884. 2019. Status: Not Yet Recruiting. Available from: <http://ctri.nic.in/Clinicaltrials/pmaindet2.php?trialid=29298> [Accessed 11 August 2020].
- 647 Clinicaltrials.gov. Lower-Dose Chemoradiation in Treating Patients With Early-Stage Anal Cancer- the DECREASE Study. Trial ID: NCT04166318. 2019. Status: Recruiting. Available from: <https://clinicaltrials.gov/ct2/show/record/NCT04166318> [Accessed 11 August 2020].
- 648 Clinicaltrials.gov. Drainage Seton With Flap Versus EAS Preserving Seton in Treatment of Transsphincteric Anal Fistula. Trial ID: NCT03983174. 2019. Status: Completed. Available from: <https://clinicaltrials.gov/ct2/show/record/NCT03983174> [Accessed 11 August 2020].
- 649 Clinicaltrials.gov. Laser Closure of Anal Fistula (FiLaC). Trial ID: NCT04161469. 2019. Status: Recruiting. Available from: <https://clinicaltrials.gov/ct2/show/record/NCT04161469> [Accessed 11 August 2020].
- 650 Clinicaltrials.gov. Yield of Diagnostic Tests and Effects of Crofelemer for Chronic Idiopathic Diarrhea In Non-HIV Patients. Trial ID: NCT03898856. 2019. Status: Not Yet Recruiting. Available from: <https://clinicaltrials.gov/ct2/show/record/NCT03898856> [Accessed 11 August 2020].
- 651 Clinicaltrials.gov. Efficacy and Safety of Vibrant Capsule vs. Placebo for the Treatment of Chronic Idiopathic Constipation (Vibrant). Trial ID: NCT03879239. 2019. Status: Not Yet Recruiting. Available from: <https://clinicaltrials.gov/ct2/show/record/NCT03879239> [Accessed 11 August 2020].
- 652 Clinicaltrials.gov. Measures to Increase the Effectiveness of Fast Track Colorectal Clinics for Iron Deficiency Anaemia. Trial ID: NCT03988712. 2019. Status: Completed. Available from: <https://clinicaltrials.gov/ct2/show/record/NCT03988712> [Accessed 11 August 2020].
- 653 Clinicaltrials.gov. The Problem of Colorectal Anastomosis Safety (ANSCRS). Trial ID: NCT03958500. 2019. Status: Recruiting. Available from: <https://clinicaltrials.gov/ct2/show/record/NCT03958500> [Accessed 11 August 2020].
- 654 Clinicaltrials.gov. The Use of Osmotic Laxatives Versus Macrogol for Bowel Preparation in Patients Undergoing Colonoscopy (CLEAN). Trial ID: NCT04225793. 2019. Status: Recruiting. Available from: <https://clinicaltrials.gov/ct2/show/record/NCT04225793> [Accessed 11 August 2020].
- 655 Clinicaltrials.gov. Understanding Mechanisms of Normal and Disordered Defecation. Trial ID: NCT03842007. 2019. Status: Recruiting. Available from: <https://clinicaltrials.gov/ct2/show/record/NCT03842007> [Accessed 11 August 2020].
- 656 Clinicaltrials.gov. Efficacy and Safety of PEG 3350 for Treatment of Chronic Constipation. Trial ID: NCT03957668. 2019. Status: Not Yet Recruiting. Available from: <https://clinicaltrials.gov/ct2/show/record/NCT03957668> [Accessed 11 August 2020].
- 657 Clinicaltrials.gov. The Association Between Calretinin and the Function of Ganglion Cells in Hirschsprung Disease. Trial ID: NCT04149093. 2019. Status: Not Yet Recruiting. Available from: <https://clinicaltrials.gov/ct2/show/record/NCT04149093> [Accessed 11 August 2020].
- 658 Clinicaltrials.gov. Implantation of a Pudendal PNA Test Lead for Neuromodulation by the ENTRAMI Technique in Case of Chronic Perineal Pain Syndrome. Trial ID: NCT03880786. 2019. Status: Recruiting. Available from: <https://clinicaltrials.gov/ct2/show/record/NCT03880786> [Accessed 11 August 2020].

- 659 Clinicaltrials.gov. Transanal Total Mesorectal Excision Versus Robotic Total Mesorectal Excision (TaRo). Trial ID: NCT04091620. 2019. Status: Recruiting. Available from: <https://clinicaltrials.gov/ct2/show/record/NCT04091620> [Accessed 11 August 2020].
- 660 Clinicaltrials.gov. TNT Versus Conventional CRT to Increase the Sphincter Preservation Rate for Distal LARC (TESS). Trial ID: NCT03840239. 2019. Status: Recruiting. Available from: <https://clinicaltrials.gov/ct2/show/record/NCT03840239> [Accessed 11 August 2020].
- 661 Clinicaltrials.gov. Effects of Crofelemer on the Gut Microbiome in Healthy Volunteers and in HIV+ Patients With Non-Infectious Diarrhea. Trial ID: NCT04192487. 2019. Status: Recruiting. Available from: <https://clinicaltrials.gov/ct2/show/record/NCT04192487> [Accessed 11 August 2020].
- 662 Clinicaltrials.gov. A Phase of Injection for Recombinant Human Tissue Plasminogen Kinase Derivative in Treatment of Acute Ischemic Stroke. Trial ID: NCT04028518. 2019. Status: Not Yet Recruiting. Available from: <https://clinicaltrials.gov/ct2/show/record/NCT04028518> [Accessed 11 August 2020].
- 663 Clinicaltrials.gov. Anlotinib Hydrochloride Combined With Sintilimab Injection in the Treatment of Advanced Hepatocellular Carcinoma (HCC). Trial ID: NCT04052152. 2019. Status: Recruiting. Available from: <https://clinicaltrials.gov/ct2/show/record/NCT04052152> [Accessed 11 August 2020].
- 664 Clinicaltrials.gov. Combination Treatment (Talazoparib Plus Avelumab) for Stage IV or Recurrent Non-Squamous Non-Small Cell Lung Cancer With STK11 Gene Mutation (A LUNG-MAP Treatment Trial). Trial ID: NCT04173507. 2019. Status: Not Yet Recruiting. Available from: <https://clinicaltrials.gov/ct2/show/record/NCT04173507> [Accessed 11 August 2020].
- 665 Clinicaltrials.gov. Ipilimumab and Nivolumab in Combination With Radiation Therapy in Treating Patients With Stage 2-3 Non-small Lung Cancer. Trial ID: NCT04013542. 2019. Status: Recruiting. Available from: <https://clinicaltrials.gov/ct2/show/record/NCT04013542> [Accessed 11 August 2020].
- 666 Clinicaltrials.gov. Monocentric Feasibility Study for a New Medical Device for the Treatment of Anal Fissure With Botulinum Toxin. Trial ID: NCT04173130. 2019. Status: Recruiting. Available from: <https://clinicaltrials.gov/ct2/show/record/NCT04173130> [Accessed 11 August 2020].
- 667 Clinicaltrials.gov. Marsupialization of Anal Fistulotomy Wound Accelerates Healing and Decreases Post Operative Pain. Trial ID: NCT04155905. 2019. Status: Completed. Available from: <https://clinicaltrials.gov/ct2/show/record/NCT04155905> [Accessed 11 August 2020].
- 668 Clinicaltrials.gov. THREE-row Circular STAPLER in Low Anterior Resection for Rectal Cancer (THREESTAPLER). Trial ID: NCT03910699. 2019. Status: Recruiting. Available from: <https://clinicaltrials.gov/ct2/show/record/NCT03910699> [Accessed 11 August 2020].
- 669 Clinicaltrials.gov. Effect of Multimodal Opioid-free Anesthesia on Return of Bowel Function in Laparoscopic Colorectal Surgery (RUMBLE). Trial ID: NCT04144933. 2019. Status: Not Yet Recruiting. Available from: <https://clinicaltrials.gov/ct2/show/record/NCT04144933> [Accessed 11 August 2020].
- 670 Clinicaltrials.gov. Immunotherapy (Nivolumab or Brentuximab Vedotin) Plus Combination Chemotherapy in Treating Patients With Newly Diagnosed Stage III-IV Classic Hodgkin Lymphoma. Trial ID: NCT03907488. 2019. Status: Recruiting. Available from: <https://clinicaltrials.gov/ct2/show/record/NCT03907488> [Accessed 11 August 2020].
- 671 Clinicaltrials.gov. Nurse-led Antimicrobial Stewardship Intervention to Increase Antibiotic Appropriateness in Residential Aged Care Facilities. Trial ID: NCT03941509. 2019. Status: Recruiting. Available from: <https://clinicaltrials.gov/ct2/show/record/NCT03941509> [Accessed 11 August 2020].
- 672 Clinicaltrials.gov. The Effects of Topical Corticosteroid Use on Insulin Sensitivity and Bone Turnover. Trial ID: NCT04114097. 2019. Status: Recruiting. Available from: <https://clinicaltrials.gov/ct2/show/record/NCT04114097> [Accessed 11 August 2020].

- 673 Clinicaltrials.gov. Efficacy- Safety- and Tolerability Study of Oral Full-Spectrum Microbiota™ (CP101) in Subjects With Autism Spectrum Disorder and Associated GI Symptoms (SPROUT) (SPROUT). Trial ID: NCT03829878. 2019. Status: Not Yet Recruiting. Available from: <https://clinicaltrials.gov/ct2/show/record/NCT03829878> [Accessed 11 August 2020].
- 674 Clinicaltrials.gov. Pharmacokinetics of Rivaroxaban After Bariatric Surgery (ABSORB). Trial ID: NCT04180436. 2019. Status: Recruiting. Available from: <https://clinicaltrials.gov/ct2/show/record/NCT04180436> [Accessed 11 August 2020].
- 675 Clinicaltrials.gov. Intracavitary Injection of hUMSCs in Acute Basal Ganglia Hematoma After Stereotactic Aspiration. Trial ID: NCT04074408. 2019. Status: Not Yet Recruiting. Available from: <https://clinicaltrials.gov/ct2/show/record/NCT04074408> [Accessed 11 August 2020].
- 676 Clinicaltrials.gov. De-intensified Radiation Therapy With Chemotherapy (Cisplatin) or Immunotherapy (Nivolumab) in Treating Patients With Early-Stage- HPV-Positive- Non-Smoking Associated Oropharyngeal Cancer. Trial ID: NCT03952585. 2019. Status: Recruiting. Available from: <https://clinicaltrials.gov/ct2/show/record/NCT03952585> [Accessed 11 August 2020].
- 677 Clinicaltrials.gov. The Effectiveness of Core Stability Exercises (CORE). Trial ID: NCT03975985. 2019. Status: Recruiting. Available from: <https://clinicaltrials.gov/ct2/show/record/NCT03975985> [Accessed 11 August 2020].
- 678 Clinicaltrials.gov. A Pilot Trial of Preoperative Oral Probiotics (RBX7455). Trial ID: NCT04139993. 2019. Status: Not Yet Recruiting. Available from: <https://clinicaltrials.gov/ct2/show/record/NCT04139993> [Accessed 11 August 2020].
- 679 Clinicaltrials.gov. Effects of Modified Pilates Exercises on Body Control- Gait and Function in Children With Cerebral Palsy. Trial ID: NCT04035954. 2019. Status: Recruiting. Available from: <https://clinicaltrials.gov/ct2/show/record/NCT04035954> [Accessed 11 August 2020].
- 680 Clinicaltrials.gov. Investigation of Parents' Anxiety Level and Health Related Quality of Life in Different Types of Physical Disabilities. Trial ID: NCT04035967. 2019. Status: Completed. Available from: <https://clinicaltrials.gov/ct2/show/record/NCT04035967> [Accessed 11 August 2020].
- 681 Clinicaltrials.gov. High Dose Multiple Site Injection of Botox Versus Lateral Sphincterotomy in Chronic Anal Fissure (professor). Trial ID: NCT04166175. 2019. Status: Completed. Available from: <https://clinicaltrials.gov/ct2/show/record/NCT04166175> [Accessed 11 August 2020].
- 682 Clinicaltrials.gov. Muscle Function After Intensive Care. Trial ID: NCT03922113. 2019. Status: Completed. Available from: <https://clinicaltrials.gov/ct2/show/record/NCT03922113> [Accessed 11 August 2020].
- 683 Clinicaltrials.gov. Anorectal Function in Perianal Crohn's Disease. Trial ID: NCT03819257. 2019. Status: Completed. Available from: <https://clinicaltrials.gov/ct2/show/record/NCT03819257> [Accessed 11 August 2020].
- 684 Clinicaltrials.gov. Oral Administration of MB-102 Versus Dual Sugar Testing for Gut Permeability. Trial ID: NCT03962998. 2019. Status: Recruiting. Available from: <https://clinicaltrials.gov/ct2/show/record/NCT03962998> [Accessed 11 August 2020].
- 685 Clinicaltrials.gov. Biomarkers of Intestinal Fibrosis in Small Bowel Crohn's Disease. Trial ID: NCT04088773. 2019. Status: Not Yet Recruiting. Available from: <https://clinicaltrials.gov/ct2/show/record/NCT04088773> [Accessed 11 August 2020].
- 686 Clinicaltrials.gov. The ADDapt Diet in Reducing Crohn's Disease Inflammation. Trial ID: NCT04046913. 2019. Status: Recruiting. Available from: <https://clinicaltrials.gov/ct2/show/record/NCT04046913> [Accessed 11 August 2020].
- 687 Clinicaltrials.gov. Effect of Acupuncture on Patients With Crohn's Disease in Remission. Trial ID: NCT04211129. 2019. Status: Recruiting. Available from: <https://clinicaltrials.gov/ct2/show/record/NCT04211129> [Accessed 11 August 2020].
- 688 Clinicaltrials.gov. Adipose Tissue Injection in Perianal Fistulas in Crohn's Disease. Trial ID: NCT03904212. 2019. Status: Recruiting. Available from: <https://clinicaltrials.gov/ct2/show/record/NCT03904212> [Accessed 11 August 2020].
- 689 Clinicaltrials.gov. Special Physical Exercises as a Therapeutic Intervention for Inflammatory Bowel Disease. Trial ID: NCT04303260. 2019. Status: Recruiting. Available from: <https://clinicaltrials.gov/ct2/show/record/NCT04303260> [Accessed 11 August 2020].

- 690 Clinicaltrials.gov. Safety and Efficacy of Fecal Microbiota Transplantation. Trial ID: NCT04014413. 2019. Status: Not Yet Recruiting. Available from: <https://clinicaltrials.gov/ct2/show/record/NCT04014413> [Accessed 11 August 2020].
- 691 Clinicaltrials.gov. Effectiveness of a Physical Activity Intervention for Pre-frail Older Adults With Chronic Pain. Trial ID: NCT04045535. 2019. Status: Completed. Available from: <https://clinicaltrials.gov/ct2/show/record/NCT04045535> [Accessed 11 August 2020].
- 692 Clinicaltrials.gov. Effectiveness of Aquatic Exercises for Improving Mental and Physical Health in Adults. (AEforMH). Trial ID: NCT04100850. 2019. Status: Recruiting. Available from: <https://clinicaltrials.gov/ct2/show/record/NCT04100850> [Accessed 11 August 2020].
- 693 Clinicaltrials.gov. Frequency Specific Microcurrent for the Treatment of Diastasis Recti. Trial ID: NCT04060563. 2019. Status: Recruiting. Available from: <https://clinicaltrials.gov/ct2/show/record/NCT04060563> [Accessed 11 August 2020].
- 694 Clinicaltrials.gov. Bowel Function/QoL After Elective Sigmoidectomy vs. Conservative Management for Recurrent Uncomplicated Diverticulitis. Trial ID: NCT03994978. 2019. Status: Recruiting. Available from: <https://clinicaltrials.gov/ct2/show/record/NCT03994978> [Accessed 11 August 2020].
- 695 Clinicaltrials.gov. Mechanistic Characterization of Uterine Pain (MCUP). Trial ID: NCT04145518. 2019. Status: Recruiting. Available from: <https://clinicaltrials.gov/ct2/show/record/NCT04145518> [Accessed 11 August 2020].
- 696 Clinicaltrials.gov. Translational Research in Pelvic Pain (TRiPP). Trial ID: NCT04001244. 2019. Status: Recruiting. Available from: <https://clinicaltrials.gov/ct2/show/record/NCT04001244> [Accessed 11 August 2020].
- 697 Clinicaltrials.gov. The Impact of NOSE-colectomy on Fertility and Quality of Life Among Patients With Colorectal Endometriosis (NOSERES). Trial ID: NCT04109378. 2019. Status: Recruiting. Available from: <https://clinicaltrials.gov/ct2/show/record/NCT04109378> [Accessed 11 August 2020].
- 698 Clinicaltrials.gov. Dabrafenib and Trametinib in Treating Patients With Erdheim Chester Disease With BRAF V600 Mutations. Trial ID: NCT03794297. 2019. Status: Recruiting. Available from: <https://clinicaltrials.gov/ct2/show/record/NCT03794297> [Accessed 11 August 2020].
- 699 Clinicaltrials.gov. Epigenetic Regulation in Fibrous Dysplasia of Bone: mirDYS Study. (MirDYS). Trial ID: NCT03838991. 2019. Status: Recruiting. Available from: <https://clinicaltrials.gov/ct2/show/record/NCT03838991> [Accessed 11 August 2020].
- 700 Clinicaltrials.gov. Complex Treatment of a Chronic Anal Fissure. Trial ID: NCT03855046. 2019. Status: Recruiting. Available from: <https://clinicaltrials.gov/ct2/show/record/NCT03855046> [Accessed 11 August 2020].
- 701 Clinicaltrials.gov. Fistulotomy With Marsupialization Versus Fistulectomy With Wound Sutures in Simple Anal Fistula. Trial ID: NCT04215718. 2019. Status: Completed. Available from: <https://clinicaltrials.gov/ct2/show/record/NCT04215718> [Accessed 11 August 2020].
- 702 Clinicaltrials.gov. The Efficacy and Safety of 'BST104' (Loniceria Flos Extract) in Mild to Moderate Functional Dyspepsia Subjects. Trial ID: NCT04008901. 2019. Status: Completed. Available from: <https://clinicaltrials.gov/ct2/show/record/NCT04008901> [Accessed 11 August 2020].
- 703 Clinicaltrials.gov. Gut-microbiota Targeted Nutritional Intervention for Gut Barrier Integrity at High Altitude. Trial ID: NCT04111263. 2019. Status: Recruiting. Available from: <https://clinicaltrials.gov/ct2/show/record/NCT04111263> [Accessed 11 August 2020].
- 704 Clinicaltrials.gov. A First-in-human Phase Ia/b- Open Label- Multicentre- Dose Escalation Study of BI 905711 in Patients With Advanced Gastrointestinal Cancers. Trial ID: NCT04137289. 2019. Status: Not Yet Recruiting. Available from: <https://clinicaltrials.gov/ct2/show/record/NCT04137289> [Accessed 11 August 2020].

- 705 Clinicaltrials.gov. A Clinical Trial to Evaluate the Chronic Safety and Tolerance of Turmipure Gold in Healthy Subjects (TURBIO-GOLD). Trial ID: NCT03945149. 2019. Status: Recruiting. Available from: <https://clinicaltrials.gov/ct2/show/record/NCT03945149> [Accessed 11 August 2020].
- 706 Clinicaltrials.gov. Study of the IgA Repertoire During IgA Deposition Nephropathy. (ERINA). Trial ID: NCT04092491. 2019. Status: Not Yet Recruiting. Available from: <https://clinicaltrials.gov/ct2/show/record/NCT04092491> [Accessed 11 August 2020].
- 707 Clinicaltrials.gov. RIGHTWHEY - Responders In Gut Health Markers Using Fermented WHEY (RIGHTWHEY). Trial ID: NCT03844152. 2019. Status: Recruiting. Available from: <https://clinicaltrials.gov/ct2/show/record/NCT03844152> [Accessed 11 August 2020].
- 708 Clinicaltrials.gov. A Trial to Investigate the Safety- Tolerability- and Drug Levels in Blood After Single and Multiple Doses of LEO 32731 in Healthy People. Trial ID: NCT03812198. 2019. Status: Completed. Available from: <https://clinicaltrials.gov/ct2/show/record/NCT03812198> [Accessed 11 August 2020].
- 709 Clinicaltrials.gov. A Study Investigating the Effect of Floradap Mature Immune Defense on Nutrient Uptake and Digestive Health in a Healthy Elderly Population. Trial ID: NCT04147923. 2019. Status: Recruiting. Available from: <https://clinicaltrials.gov/ct2/show/record/NCT04147923> [Accessed 11 August 2020].
- 710 Clinicaltrials.gov. Cerebral Cortical Influences on Autonomic Function. Trial ID: NCT03869372. 2019. Status: Recruiting. Available from: <https://clinicaltrials.gov/ct2/show/record/NCT03869372> [Accessed 11 August 2020].
- 711 Clinicaltrials.gov. Mass Balance and Pharmacokinetics Study of Derazantinib in Healthy Male Subjects. Trial ID: NCT04098692. 2019. Status: Recruiting. Available from: <https://clinicaltrials.gov/ct2/show/record/NCT04098692> [Accessed 11 August 2020].
- 712 Clinicaltrials.gov. Napoleon Trial: Optimal Treatment for Recurrent Haemorrhoidal Disease. Trial ID: NCT04101773. 2019. Status: Not Yet Recruiting. Available from: <https://clinicaltrials.gov/ct2/show/record/NCT04101773> [Accessed 11 August 2020].
- 713 Clinicaltrials.gov. Ligasure Hemorrhoidectomy Versus Open Hemorrhoidectomy. Trial ID: NCT04139876. 2019. Status: Recruiting. Available from: <https://clinicaltrials.gov/ct2/show/record/NCT04139876> [Accessed 11 August 2020].
- 714 Clinicaltrials.gov. Study of Binimetinib With Encorafenib in Adults With Recurrent BRAF V600-Mutated HGG (BRAF). Trial ID: NCT03973918. 2019. Status: Recruiting. Available from: <https://clinicaltrials.gov/ct2/show/record/NCT03973918> [Accessed 11 August 2020].
- 715 Clinicaltrials.gov. Safety and Pharmacokinetic Study of Tenofovir Alafenamide (TAF)/Elvitegravir (EVC) Administered Rectally. Trial ID: NCT04047420. 2019. Status: Recruiting. Available from: <https://clinicaltrials.gov/ct2/show/record/NCT04047420> [Accessed 11 August 2020].
- 716 Clinicaltrials.gov. Tenofovir Rectal Douche to Prevent HIV Transmission (DREAM-03). Trial ID: NCT04016233. 2019. Status: Recruiting. Available from: <https://clinicaltrials.gov/ct2/show/record/NCT04016233> [Accessed 11 August 2020].
- 717 Clinicaltrials.gov. Evaluating Distribution of a Tenofovir Douche With Tap Water Douching and Simulated Receptive Anal Intercourse (DREAM-02). Trial ID: NCT04195776. 2019. Status: Not Yet Recruiting. Available from: <https://clinicaltrials.gov/ct2/show/record/NCT04195776> [Accessed 11 August 2020].
- 718 Clinicaltrials.gov. Exercise- Hypertension- and Gut Dysbiosis in African Americans. Trial ID: NCT03897777. 2019. Status: Not Yet Recruiting. Available from: <https://clinicaltrials.gov/ct2/show/record/NCT03897777> [Accessed 11 August 2020].
- 719 Clinicaltrials.gov. Fluorescence Imaging of Disease Activity in IBD and Rheumatoid Arthritis Using OTL38 (AVIATOR). Trial ID: NCT03938701. 2019. Status: Not Yet Recruiting. Available from: <https://clinicaltrials.gov/ct2/show/record/NCT03938701> [Accessed 11 August 2020].
- 720 Clinicaltrials.gov. Irritable Bowel Syndrome and Control Volunteers: Diet Challenge. Trial ID: NCT03983434. 2019. Status: Recruiting. Available from: <https://clinicaltrials.gov/ct2/show/record/NCT03983434> [Accessed 11 August 2020].

- 721 Clinicaltrials.gov. Stool Testing With Molecular Assay to Minimize Contact Precautions. Trial ID: NCT04189874. 2019. Status: Recruiting. Available from: <https://clinicaltrials.gov/ct2/show/record/NCT04189874> [Accessed 11 August 2020].
- 722 Clinicaltrials.gov. Evaluation of the Safety and Effectiveness of Switching From Humira to Imraldi in Flanders (SafE-OrBi). Trial ID: NCT04045782. 2019. Status: Recruiting. Available from: <https://clinicaltrials.gov/ct2/show/record/NCT04045782> [Accessed 11 August 2020].
- 723 Clinicaltrials.gov. The Role of the Pregnane X Receptor (PXR) in Indole Signaling and Intestinal Permeability in Inflammatory Bowel Disease. Trial ID: NCT04089501. 2019. Status: Completed. Available from: <https://clinicaltrials.gov/ct2/show/record/NCT04089501> [Accessed 11 August 2020].
- 724 Clinicaltrials.gov. Inflammatory Bowel Disease Tracker (IBD Tracker) (IBDTr). Trial ID: NCT03953794. 2019. Status: Not Yet Recruiting. Available from: <https://clinicaltrials.gov/ct2/show/record/NCT03953794> [Accessed 11 August 2020].
- 725 Clinicaltrials.gov. IBD Registry in a Sub-Saharan African Population. Trial ID: NCT04178408. 2019. Status: Not Yet Recruiting. Available from: <https://clinicaltrials.gov/ct2/show/record/NCT04178408> [Accessed 11 August 2020].
- 726 Clinicaltrials.gov. Effect of Acupuncture on Mild to Moderate Active Crohn's Disease. Trial ID: NCT04187820. 2019. Status: Recruiting. Available from: <https://clinicaltrials.gov/ct2/show/record/NCT04187820> [Accessed 11 August 2020].
- 727 Clinicaltrials.gov. Marine Protein Hydrolysate as Dietary Supplement in Irritable Bowel Syndrome (MPH\_IBS). Trial ID: NCT03801057. 2019. Status: Completed. Available from: <https://clinicaltrials.gov/ct2/show/record/NCT03801057> [Accessed 11 August 2020].
- 728 Clinicaltrials.gov. Effectiveness of Probiotics Stabilized With Cryoprotection Technology in Patients With Irritable Bowel Syndrome. Trial ID: NCT04206410. 2019. Status: Completed. Available from: <https://clinicaltrials.gov/ct2/show/record/NCT04206410> [Accessed 11 August 2020].
- 729 Clinicaltrials.gov. A Novel Formulation of Bifidobacterium Longum BB536 and Lactobacillus Rhamnosus HN001 With Vitamin B6 on IBS Patients (LLB). Trial ID: NCT03815617. 2019. Status: Completed. Available from: <https://clinicaltrials.gov/ct2/show/record/NCT03815617> [Accessed 11 August 2020].
- 730 Clinicaltrials.gov. Long-term Safety of Linaclotide in Pediatric Participants With FC or IBS-C. Trial ID: NCT04166058. 2019. Status: Not Yet Recruiting. Available from: <https://clinicaltrials.gov/ct2/show/record/NCT04166058> [Accessed 11 August 2020].
- 731 Clinicaltrials.gov. A Comparison of the Effects of ORP-101 Versus Placebo in Adult Patients With Irritable Bowel Syndrome With Diarrhea (IBS-D). Trial ID: NCT04129619. 2019. Status: Not Yet Recruiting. Available from: <https://clinicaltrials.gov/ct2/show/record/NCT04129619> [Accessed 11 August 2020].
- 732 Clinicaltrials.gov. G-PUR for Symptomatic Treatment in Irritable Bowel Syndrome With Diarrhea. Trial ID: NCT04138186. 2019. Status: Recruiting. Available from: <https://clinicaltrials.gov/ct2/show/record/NCT04138186> [Accessed 11 August 2020].
- 733 Clinicaltrials.gov. P-POSSUM Score and Length of Stay. Trial ID: NCT03933137. 2019. Status: Completed. Available from: <https://clinicaltrials.gov/ct2/show/record/NCT03933137> [Accessed 11 August 2020].
- 734 Clinicaltrials.gov. Study of Erectile Dysfunction- Urinary Incontinence and Related QoL After TOOKAD VTP for Low Risk Prostate Cancer. Trial ID: NCT03849365. 2019. Status: Recruiting. Available from: <https://clinicaltrials.gov/ct2/show/record/NCT03849365> [Accessed 11 August 2020].
- 735 Clinicaltrials.gov. Acalabrutinib-Lenalidomide-Rituximab in Patients With Untreated MCL. Trial ID: NCT03863184. 2019. Status: Recruiting. Available from: <https://clinicaltrials.gov/ct2/show/record/NCT03863184> [Accessed 11 August 2020].
- 736 Clinicaltrials.gov. Identification and Treatment Of Micrometastatic Disease in Stage III Colon Cancer. Trial ID: NCT03803553. 2019. Status: Recruiting. Available from: <https://clinicaltrials.gov/ct2/show/record/NCT03803553> [Accessed 11 August 2020].

- 737 Clinicaltrials.gov. Efficacy and Safety of Oral Rifaximin in Patients With Active Microscopic Colitis. Trial ID: NCT04043897. 2019. Status: Recruiting. Available from: <https://clinicaltrials.gov/ct2/show/record/NCT04043897> [Accessed 11 August 2020].
- 738 Clinicaltrials.gov. Trial of Erythrocyte Encapsulated Thymidine Phosphorylase In Mitochondrial Neurogastrointestinal Encephalomyopathy (TEETPIM). Trial ID: NCT03866954. 2019. Status: Not Yet Recruiting. Available from: <https://clinicaltrials.gov/ct2/show/record/NCT03866954> [Accessed 11 August 2020].
- 739 Clinicaltrials.gov. Role of MRI Defecography in Diagnosis of Obstructed Defecation Syndrome. Trial ID: NCT03841006. 2019. Status: Not Yet Recruiting. Available from: <https://clinicaltrials.gov/ct2/show/record/NCT03841006> [Accessed 11 August 2020].
- 740 Clinicaltrials.gov. S1803- Daratumumab/rHuPh20 +/- Lenalidomide as Post-ASCT Maintenance for MM w/MRD to Direct Therapy Duration (DRAMMATIC). Trial ID: NCT04071457. 2019. Status: Recruiting. Available from: <https://clinicaltrials.gov/ct2/show/record/NCT04071457> [Accessed 11 August 2020].
- 741 Clinicaltrials.gov. Oral FMT (Fecal Microbial Transplant) in Subjects With Multiple Sclerosis. Trial ID: NCT04096443. 2019. Status: Recruiting. Available from: <https://clinicaltrials.gov/ct2/show/record/NCT04096443> [Accessed 11 August 2020].
- 742 Clinicaltrials.gov. Reliability and Validity of Glittre Activities Of Daily Living (ADL) Test in Multiple Sclerosis Patients. Trial ID: NCT04182269. 2019. Status: Completed. Available from: <https://clinicaltrials.gov/ct2/show/record/NCT04182269> [Accessed 11 August 2020].
- 743 Clinicaltrials.gov. Prebiotic vs Probiotic in Multiple Sclerosis (MS). Trial ID: NCT04038541. 2019. Status: Recruiting. Available from: <https://clinicaltrials.gov/ct2/show/record/NCT04038541> [Accessed 11 August 2020].
- 744 Clinicaltrials.gov. PTNS on Urinary and Global Quality of Life in MS Patients (PTNSinMS). Trial ID: NCT04063852. 2019. Status: Recruiting. Available from: <https://clinicaltrials.gov/ct2/show/record/NCT04063852> [Accessed 11 August 2020].
- 745 Clinicaltrials.gov. Pudendal Nerve Block in Vaginal Surgery. Trial ID: NCT04198714. 2019. Status: Recruiting. Available from: <https://clinicaltrials.gov/ct2/show/record/NCT04198714> [Accessed 11 August 2020].
- 746 Clinicaltrials.gov. Effects of Different Bread Types in NCGS (BREAD). Trial ID: NCT04084470. 2019. Status: Recruiting. Available from: <https://clinicaltrials.gov/ct2/show/record/NCT04084470> [Accessed 11 August 2020].
- 747 Clinicaltrials.gov. Activity of Lorlatinib Based on ALK Resistance Mutations Detected on Blood in ALK Positive NSCLC Patients (ALKALINE). Trial ID: NCT04127110. 2019. Status: Not Yet Recruiting. Available from: <https://clinicaltrials.gov/ct2/show/record/NCT04127110> [Accessed 11 August 2020].
- 748 Clinicaltrials.gov. Environmental Health Effects on Your Physiology (HYPHY). Trial ID: NCT03986814. 2019. Status: Recruiting. Available from: <https://clinicaltrials.gov/ct2/show/record/NCT03986814> [Accessed 11 August 2020].
- 749 Clinicaltrials.gov. Investigating the Possible Link Between Habitual Diet- Physical Activity- Sleeping Patterns- Obesity Status and Age With Gut Bacterial Composition- Gut Barrier Function- Metabolic Endotoxemia- Systemic Inflammation and Glycaemic Control. Trial ID: NCT03864107. 2019. Status: Recruiting. Available from: <https://clinicaltrials.gov/ct2/show/record/NCT03864107> [Accessed 11 August 2020].
- 750 Clinicaltrials.gov. Prostate-cancer Treatment Using Stereotactic Radiotherapy for Oligometastases Ablation in Hormone-sensitive Patients (PRESTO). Trial ID: NCT04115007. 2019. Status: Not Yet Recruiting. Available from: <https://clinicaltrials.gov/ct2/show/record/NCT04115007> [Accessed 11 August 2020].
- 751 Clinicaltrials.gov. Effect of Opioid Free Anesthetic on Post-Operative Opioid Consumption After Laparoscopic Bariatric Surgery. Trial ID: NCT04081545. 2019. Status: Not Yet Recruiting. Available from: <https://clinicaltrials.gov/ct2/show/record/NCT04081545> [Accessed 11 August 2020].
- 752 Clinicaltrials.gov. Epigenetic Regulation of Osteogenesis Imperfecta Severity : miROI Study (miROI). Trial ID: NCT04009733. 2019. Status: Recruiting. Available from: <https://clinicaltrials.gov/ct2/show/record/NCT04009733> [Accessed 11 August 2020].

- 753 Clinicaltrials.gov. Effect of Time-restricted Eating on Behaviour and Metabolism in Overweight Individuals at High Risk of Type 2 Diabetes (RESET). Trial ID: NCT03854656. 2019. Status: Recruiting. Available from: <https://clinicaltrials.gov/ct2/show/record/NCT03854656> [Accessed 11 August 2020].
- 754 Clinicaltrials.gov. Modified Atkins Diet for Overweight and Obesity. Trial ID: NCT04207879. 2019. Status: Not Yet Recruiting. Available from: <https://clinicaltrials.gov/ct2/show/record/NCT04207879> [Accessed 11 August 2020].
- 755 Clinicaltrials.gov. the Effect of Doctor-nurse-patient Cooperative Analgesic Linkage Program on Movement Evoked Pain. Trial ID: NCT03823846. 2019. Status: Recruiting. Available from: <https://clinicaltrials.gov/ct2/show/record/NCT03823846> [Accessed 11 August 2020].
- 756 Clinicaltrials.gov. Study Evaluating NEOadjuvant Immunotherapy in Resectable PANcreatic Ductal Adenocarcinoma (NEOIPANC). Trial ID: NCT03979066. 2019. Status: Recruiting. Available from: <https://clinicaltrials.gov/ct2/show/record/NCT03979066> [Accessed 11 August 2020].
- 757 Clinicaltrials.gov. Fixed-Dose Trial in Early Parkinson's Disease (PD) (TEMPO-1). Trial ID: NCT04201093. 2019. Status: Recruiting. Available from: <https://clinicaltrials.gov/ct2/show/record/NCT04201093> [Accessed 11 August 2020].
- 758 Clinicaltrials.gov. the Effects of a Nursing Trauma Care Bundle. Trial ID: NCT04077541. 2019. Status: Not Yet Recruiting. Available from: <https://clinicaltrials.gov/ct2/show/record/NCT04077541> [Accessed 11 August 2020].
- 759 Clinicaltrials.gov. ERAS vs Conventional Approach in Peptic Perforation-RCT (ERASE). Trial ID: NCT04194060. 2019. Status: Recruiting. Available from: <https://clinicaltrials.gov/ct2/show/record/NCT04194060> [Accessed 11 August 2020].
- 760 Clinicaltrials.gov. Perianal Fistula Treatment With Autologous Adipose Tissue Injection. Trial ID: NCT03913910. 2019. Status: Recruiting. Available from: <https://clinicaltrials.gov/ct2/show/record/NCT03913910> [Accessed 11 August 2020].
- 761 Clinicaltrials.gov. Probiotic (LGG) for Veterans With PTSD. Trial ID: NCT04150380. 2019. Status: Not Yet Recruiting. Available from: <https://clinicaltrials.gov/ct2/show/record/NCT04150380> [Accessed 11 August 2020].
- 762 Clinicaltrials.gov. A Study to Evaluate the Efficacy and Safety of 2 Dose Regimens of Intravenous TAK-954 for the Prophylaxis and Treatment of Postoperative Gastrointestinal Dysfunction in Participants Undergoing Large- and Small-Bowel Resection. Trial ID: NCT03827655. 2019. Status: Recruiting. Available from: <https://clinicaltrials.gov/ct2/show/record/NCT03827655> [Accessed 11 August 2020].
- 763 Clinicaltrials.gov. Extended Release Local Anesthetic for Postsurgical Pain After Posterior Colporrhaphy and Perineorrhaphy. Trial ID: NCT03875664. 2019. Status: Completed. Available from: <https://clinicaltrials.gov/ct2/show/record/NCT03875664> [Accessed 11 August 2020].
- 764 Clinicaltrials.gov. Cost-effectiveness Comparison Between Vaginal Versus Robotic Mesh Surgery for Apical Prolapse: Prospective-Cohort Study (KIDS). Trial ID: NCT03878056. 2019. Status: Recruiting. Available from: <https://clinicaltrials.gov/ct2/show/record/NCT03878056> [Accessed 11 August 2020].
- 765 Clinicaltrials.gov. Feasibility Study of PET-MRI/68Ga-PSMA Guidance of Focal Therapy by HIFU in Patients With Prostate Cancer Recurrence After Radiotherapy (PSMA). Trial ID: NCT03927521. 2019. Status: Not Yet Recruiting. Available from: <https://clinicaltrials.gov/ct2/show/record/NCT03927521> [Accessed 11 August 2020].
- 766 Clinicaltrials.gov. Single Fractions SBRT for Prostate Cancer. Trial ID: NCT04004312. 2019. Status: Recruiting. Available from: <https://clinicaltrials.gov/ct2/show/record/NCT04004312> [Accessed 11 August 2020].
- 767 Clinicaltrials.gov. Prostate Margin Reduction to Reduce Acute Rectal Toxicity (PROTRACT) (PROTRACT). Trial ID: NCT04004858. 2019. Status: Not Yet Recruiting. Available from: <https://clinicaltrials.gov/ct2/show/record/NCT04004858> [Accessed 11 August 2020].

- 768 Clinicaltrials.gov. INTREPId (INTErmediate Risk EreCtion Preservation Trial). Trial ID: NCT04025372. 2019. Status: Not Yet Recruiting. Available from: <https://clinicaltrials.gov/ct2/show/record/NCT04025372> [Accessed 11 August 2020].
- 769 Clinicaltrials.gov. Study of Radiation Therapy in Combination With Darolutamide + Degarelix in Intermediate Risk Prostate Cancer (SChLAP/IDC). Trial ID: NCT04176081. 2019. Status: Not Yet Recruiting. Available from: <https://clinicaltrials.gov/ct2/show/record/NCT04176081> [Accessed 11 August 2020].
- 770 Clinicaltrials.gov. Validation of the Moroccan Arabic Version of the Low Anterior Resection Syndrome (LARS) and Wexner Score of Continence Among Rectal Cancer Patients (MA\_LARSWEX). Trial ID: NCT04128657. 2019. Status: Recruiting. Available from: <https://clinicaltrials.gov/ct2/show/record/NCT04128657> [Accessed 11 August 2020].
- 771 Clinicaltrials.gov. Patient Reported Outcomes After Surgery for Rectal Endometriosis (PROCURE). Trial ID: NCT04204707. 2019. Status: Recruiting. Available from: <https://clinicaltrials.gov/ct2/show/record/NCT04204707> [Accessed 11 August 2020].
- 772 Clinicaltrials.gov. Fecal Microbiota Transplantation (FMT) in Multiple Sclerosis. Trial ID: NCT03975413. 2019. Status: Active- Not Recruiting. Available from: <https://clinicaltrials.gov/ct2/show/record/NCT03975413> [Accessed 11 August 2020].
- 773 Clinicaltrials.gov. MRI Trial to exPlore the effiCacy and Safety of IMU-838 in Relapsing Remitting Multiple Sclerosis (EMPhASIS) (EMPhASIS). Trial ID: NCT03846219. 2019. Status: Recruiting. Available from: <https://clinicaltrials.gov/ct2/show/record/NCT03846219> [Accessed 11 August 2020].
- 774 Clinicaltrials.gov. Pirfenidone Capsule in Patients With Chronic Kidney Disease G2 and G3a Study on Safety and Pharmacokinetics. Trial ID: NCT04126538. 2019. Status: Recruiting. Available from: <https://clinicaltrials.gov/ct2/show/record/NCT04126538> [Accessed 11 August 2020].
- 775 Clinicaltrials.gov. Reproductive Axis Maturation in the Early Post-Menarchal Years. Trial ID: NCT03986021. 2019. Status: Recruiting. Available from: <https://clinicaltrials.gov/ct2/show/record/NCT03986021> [Accessed 11 August 2020].
- 776 Clinicaltrials.gov. A Study of the Efficacy- Safety and Tolerability of Enteric-Coated Cholestyramine Capsules for Adult Short Bowel Syndrome. Trial ID: NCT04046328. 2019. Status: Recruiting. Available from: <https://clinicaltrials.gov/ct2/show/record/NCT04046328> [Accessed 11 August 2020].
- 777 Clinicaltrials.gov. The Impact of Electroacupuncture on Clinical Effect-Brain Structural and Functional Changes on Spinal Cord Injury. Trial ID: NCT03909958. 2019. Status: Recruiting. Available from: <https://clinicaltrials.gov/ct2/show/record/NCT03909958> [Accessed 11 August 2020].
- 778 Clinicaltrials.gov. Standing- Stepping and Voluntary Movement Spinal Cord Epidural Stimulation. Trial ID: NCT04123847. 2019. Status: Recruiting. Available from: <https://clinicaltrials.gov/ct2/show/record/NCT04123847> [Accessed 11 August 2020].
- 779 Clinicaltrials.gov. Transcutaneous Tibial Nerve Stimulation in Acute Spinal Cord Injury (TASCI). Trial ID: NCT03965299. 2019. Status: Recruiting. Available from: <https://clinicaltrials.gov/ct2/show/record/NCT03965299> [Accessed 11 August 2020].
- 780 Clinicaltrials.gov. Spinal Cord Stimulation and Autonomic Response in People With SCI. Trial ID: NCT03924388. 2019. Status: Not Yet Recruiting. Available from: <https://clinicaltrials.gov/ct2/show/record/NCT03924388> [Accessed 11 August 2020].
- 781 Clinicaltrials.gov. Evaluation of Safety and Performance of the Atalante System With Patients With Lower Limb Paralysis. Trial ID: NCT04110561. 2019. Status: Completed. Available from: <https://clinicaltrials.gov/ct2/show/record/NCT04110561> [Accessed 11 August 2020].
- 782 Clinicaltrials.gov. Duke Spine Outcome Study (DSOS) (DSOS). Trial ID: NCT04217525. 2019. Status: Recruiting. Available from: <https://clinicaltrials.gov/ct2/show/record/NCT04217525> [Accessed 11 August 2020].
- 783 Clinicaltrials.gov. Study of Nivolumab for Non-Small Cell Lung Cancer (Stage III) Following Neoadjuvant Chemotherapy Plus Nivolumab and Definitive Concurrent Chemoradiation Therapy. Trial ID: NCT04085250. 2019. Status: Not Yet Recruiting. Available from: <https://clinicaltrials.gov/ct2/show/record/NCT04085250> [Accessed 11 August 2020].

- 784 Clinicaltrials.gov. BTL Emsella Chair Versus Sham for the Treatment of Stress Urinary Incontinence. Trial ID: NCT04133675. 2019. Status: Not Yet Recruiting. Available from: <https://clinicaltrials.gov/ct2/show/record/NCT04133675> [Accessed 11 August 2020].
- 785 Clinicaltrials.gov. Aquatic Exercise and Stroke. Trial ID: NCT03957421. 2019. Status: Active- Not Recruiting. Available from: <https://clinicaltrials.gov/ct2/show/record/NCT03957421> [Accessed 11 August 2020].
- 786 Clinicaltrials.gov. SaeboGlove Therapy for Severe Upper Limb Disability and Severe Hand Impairment After Stroke (SUSHI). Trial ID: NCT04007315. 2019. Status: Not Yet Recruiting. Available from: <https://clinicaltrials.gov/ct2/show/record/NCT04007315> [Accessed 11 August 2020].
- 787 Clinicaltrials.gov. CHinese Acute Tissue-Based Imaging Selection for Lysis In Stroke -Tenecteplase (CHABLIS-T). Trial ID: NCT04086147. 2019. Status: Not Yet Recruiting. Available from: <https://clinicaltrials.gov/ct2/show/record/NCT04086147> [Accessed 11 August 2020].
- 788 Clinicaltrials.gov. BRAIN-CONNECTS: Intensive Rehabilitation Program for Subacute Stroke Patients in an Inpatient Rehabilitation Facility. Trial ID: NCT04191109. 2019. Status: Not Yet Recruiting. Available from: <https://clinicaltrials.gov/ct2/show/record/NCT04191109> [Accessed 11 August 2020].
- 789 Clinicaltrials.gov. Prognostic Value for Predicting Outcome Using Functional Near-infrared Spectroscopy in Stroke Rehabilitation. Trial ID: NCT04288414. 2019. Status: Recruiting. Available from: <https://clinicaltrials.gov/ct2/show/record/NCT04288414> [Accessed 11 August 2020].
- 790 Clinicaltrials.gov. Nociceptive Flexor Reflex and Antispastic Treatments. Trial ID: NCT03860662. 2019. Status: Not Yet Recruiting. Available from: <https://clinicaltrials.gov/ct2/show/record/NCT03860662> [Accessed 11 August 2020].
- 791 Clinicaltrials.gov. Post-stroke Pathway: Analysis and Link With One Year Sequelae in a French Cohort of Stroke Patients (PAPAS PA). Trial ID: NCT03865173. 2019. Status: Recruiting. Available from: <https://clinicaltrials.gov/ct2/show/record/NCT03865173> [Accessed 11 August 2020].
- 792 Clinicaltrials.gov. Belimumab and Rituximab Combination Therapy for the Treatment of Diffuse Cutaneous Systemic Sclerosis. Trial ID: NCT03844061. 2019. Status: Recruiting. Available from: <https://clinicaltrials.gov/ct2/show/record/NCT03844061> [Accessed 11 August 2020].
- 793 Clinicaltrials.gov. Living Well- Dying Well. A Research Programme to Support Living Until the End (iLIVE). Trial ID: NCT04271085. 2019. Status: Not Yet Recruiting. Available from: <https://clinicaltrials.gov/ct2/show/record/NCT04271085> [Accessed 11 August 2020].
- 794 Clinicaltrials.gov. Thrombosed External Hemorrhoids: Comparison of the Thrombectomy and Local Excision Procedures in Terms of Results and Outcome (TEH) (TEH). Trial ID: NCT03903536. 2019. Status: Not Yet Recruiting. Available from: <https://clinicaltrials.gov/ct2/show/record/NCT03903536> [Accessed 11 August 2020].
- 795 Clinicaltrials.gov. Study to Evaluate Safety and Efficacy of Rifamycin SV MMX in the Treatment of Traveler's Diarrhea in Children Age 6 to 11 Years. Trial ID: NCT04026984. 2019. Status: Not Yet Recruiting. Available from: <https://clinicaltrials.gov/ct2/show/record/NCT04026984> [Accessed 11 August 2020].
- 796 Clinicaltrials.gov. Study to Evaluate Safety and Efficacy of Rifamycin SV MMX in the Treatment of Traveler's Diarrhea in Children Age 12 to 17 Years. Trial ID: NCT04027894. 2019. Status: Not Yet Recruiting. Available from: <https://clinicaltrials.gov/ct2/show/record/NCT04027894> [Accessed 11 August 2020].
- 797 Clinicaltrials.gov. Tubeless NOSES Versus Laparoscopic Radical Resection for Rectosigmoid Cancers (CORNER). Trial ID: NCT04037956. 2019. Status: Recruiting. Available from: <https://clinicaltrials.gov/ct2/show/record/NCT04037956> [Accessed 11 August 2020].

- 798 Clinicaltrials.gov. Phase 2a Study to Evaluate the Safety and Efficacy of PH100 Tablet in T2DM Patients With Recent Cardiovascular (PH100\_IIa). Trial ID: NCT04141241. 2019. Status: Completed. Available from: <https://clinicaltrials.gov/ct2/show/record/NCT04141241> [Accessed 11 August 2020].
- 799 Clinicaltrials.gov. Progression of Damage in Ulcerative Colitis (PRODUC). Trial ID: NCT03955328. 2019. Status: Not Yet Recruiting. Available from: <https://clinicaltrials.gov/ct2/show/record/NCT03955328> [Accessed 11 August 2020].
- 800 Clinicaltrials.gov. Investigation of the Faecal Loss of Vedolizumab and Its Role in Influencing Serum Drug Levels- Outcomes and Response in Ulcerative Colitis (FAVOUR). Trial ID: NCT04006080. 2019. Status: Recruiting. Available from: <https://clinicaltrials.gov/ct2/show/record/NCT04006080> [Accessed 11 August 2020].
- 801 Clinicaltrials.gov. Neuspera's Implantable Sacral Nerve Stimulation System in Patients With Symptoms of Overactive Bladder. Trial ID: NCT04232696. 2019. Status: Recruiting. Available from: <https://clinicaltrials.gov/ct2/show/record/NCT04232696> [Accessed 11 August 2020].
- 802 Clinicaltrials.gov. Cabozantinib in Patients With Locally Advanced or Metastatic Urothelial Cell Carcinoma. (CabUC). Trial ID: NCT04066595. 2019. Status: Recruiting. Available from: <https://clinicaltrials.gov/ct2/show/record/NCT04066595> [Accessed 11 August 2020].
- 803 Clinicaltrials.gov. 0050-19-RMB CTIL - VNOTES Compared to VH for Vaginal Apex Prolapse. Trial ID: NCT04078802. 2019. Status: Not Yet Recruiting. Available from: <https://clinicaltrials.gov/ct2/show/record/NCT04078802> [Accessed 11 August 2020].
- 804 Clinicaltrials.gov. Intraperitoneal and Extraperitoneal Uterosacral Ligament Suspensions for Post-Hysterectomy Vaginal Vault Prolapse. Trial ID: NCT04172896. 2019. Status: Recruiting. Available from: <https://clinicaltrials.gov/ct2/show/record/NCT04172896> [Accessed 11 August 2020].
- 805 Clinicaltrials.gov. Impact of Bariatric Surgery in Patients With Morbid Obesity (IVBIA). Trial ID: NCT04009356. 2019. Status: Recruiting. Available from: <https://clinicaltrials.gov/ct2/show/record/NCT04009356> [Accessed 11 August 2020].
- 806 Clinicaltrials.gov. Indirect Non-invasive Evaluation of Pudendal Neuropathy. Trial ID: NCT03933683. 2019. Status: Active- Not Recruiting. Available from: <https://clinicaltrials.gov/ct2/show/record/NCT03933683> [Accessed 11 August 2020].
- 807 Clinicaltrials.gov. Mind Over Matter: Electronic Bladder and Bowel Continence Self-management Program. Trial ID: NCT03976414. 2019. Status: Recruiting. Available from: <https://clinicaltrials.gov/ct2/show/record/NCT03976414> [Accessed 11 August 2020].
- 808 Clinicaltrials.gov. ePRO for Adjuvant Therapy of Gastric and Colorectal Adenocarcinoma. Trial ID: NCT04069455. 2019. Status: Not Yet Recruiting. Available from: <https://clinicaltrials.gov/ct2/show/record/NCT04069455> [Accessed 11 August 2020].
- 809 Clinicaltrials.gov. Evaluation of Safety and Efficacy of the Apyx Device for the Repair of Pelvic Organ Prolapse (POP). Trial ID: NCT03991455. 2019. Status: Recruiting. Available from: <https://clinicaltrials.gov/ct2/show/record/NCT03991455> [Accessed 11 August 2020].
- 810 EU Clinical Trials Register. OBADIAH-2: A randomised- double-blind- placebo-controlled trial of two doses of obeticholic acid and placebo in patients with primary bile acid diarrhoea; OBADIAH-2 version 0.9. Trial ID: 2019-001531-32/GB. 2019. Status: Ongoing. Available from: <https://www.clinicaltrialsregister.eu/ctr-search/trial/2019-001531-32/GB> [Accessed 11 August 2020].
- 811 EU Clinical Trials Register. A Phase IIa- Proof of Concept- Randomized- Double-Blind- Dose-Finding- Cross-Over Study of the Efficacy- Safety and Tolerability of a New Enteric-Coated Cholestyramine Capsule in Adult Short Bowel Syndrome Patients. Trial ID: 2018-004419-32/PL. 2019. Status: Ongoing. Available from: <https://www.clinicaltrialsregister.eu/ctr-search/trial/2018-004419-32/PL> [Accessed 11 August 2020].
- 812 EU Clinical Trials Register. ADAPT-PO; A Phase 3- Randomized- Double-blind- Double-dummy- Multicenter- Prospective Study to Assess the Efficacy- Safety and Pharmacokinetics of Orally Administered Tebipenem Pivoxil Hydrobromide (SPR994) Compared to Intravenous Ertapenem in Patients with Complicated Urinary Tract Infection (cUTI) or Acute Pyelonephritis (AP). Trial ID: 2018-

- 003671-35/BG. 2019. Status: Ongoing. Available from: <https://www.clinicaltrialsregister.eu/ctr-search/trial/2018-003671-35/BG> [Accessed 11 August 2020].
- 813 EU Clinical Trials Register. Randomized- double-blind- placebo-controlled- multi-centre trial to evaluate the efficacy- safety and tolerability of oral treatment with living bacteria of *E. coli* DSM 17252 (Symbioflor 2) in patients with diarrhoea-predominant irritable bowel syndrome (IBS-D) Randomisierte- doppelblinde- placebokontrollierte- multizentrische Studie zur Beurteilung der Wirksamkeit- Sicherheit und Verträglichkeit der oralen Behandlung mit Bakterienkonzentrat aus *E. coli*-Bakterien DSM 17252 (Symbioflor 2) bei Patienten mit Reizdarmsyndrom assoziiert mit Durchfall (RDS-D). Trial ID: 2018-004626-28/DE. 2019. Status: Ongoing. Available from: <https://www.clinicaltrialsregister.eu/ctr-search/trial/2018-004626-28/DE> [Accessed 11 August 2020].
- 814 EU Clinical Trials Register. Establishing the Safety and Efficacy of Reloxalase (Oxalate Decarboxylase) in Patients with Enteric Hyperoxaluria: A Phase III Randomized- Double-Blind- Placebo-Controlled Study (URIROX-2) Nachweis der Sicherheit und Wirksamkeit von Reloxalase (Oxalat-Decarboxylase) bei Patienten mit enteraler Hyperoxalurie: Eine randomisierte- doppelblinde- placebokontrollierte Phase-3-Studie (URIROX-2 ). Trial ID: 2018-000921-29/GB. 2019. Status: Ongoing. Available from: <https://www.clinicaltrialsregister.eu/ctr-search/trial/2018-000921-29/GB> [Accessed 11 August 2020].
- 815 EU Clinical Trials Register. Oral Fosfomycin versus Ciprofloxacin for Febrile Urinary Tract Infection in Men: a pilot study; FOS-MEN. Trial ID: 2017-004963-11/NL. 2019. Status: Ongoing. Available from: <https://www.clinicaltrialsregister.eu/ctr-search/trial/2017-004963-11/NL> [Accessed 11 August 2020].
- 816 EU Clinical Trials Register. Pilot Project for the Treatment of Perianal Disease through the Local Injection of Remsima Guided by Ultrasound. Number of cases. Proyecto Piloto del Tratamiento de la Enfermedad Perianal Mediante la Inyección Local de Remsima Guiada por Ecografía. Serie de Casos. Trial ID: 2019-000668-27/ES. 2019. Status: Ongoing. Available from: <https://www.clinicaltrialsregister.eu/ctr-search/trial/2019-000668-27/ES> [Accessed 11 August 2020].
- 817 ISRCTN Registry. Improving bowel preparation for colonoscopy with the use of an educational video. Trial ID: ISRCTN20368092. 2019. Status: Completed. Available from: <http://www.isrctn.com/ISRCTN20368092> [Accessed 11 August 2020].
- 818 ISRCTN Registry. Yorkshire Cancer Research Bowel Cancer Improvement Program. Trial ID: ISRCTN15907802. 2019. Status: Recruiting. Available from: <http://www.isrctn.com/ISRCTN15907802> [Accessed 11 August 2020].
- 819 ISRCTN Registry. The BD Odon Device for assisted vaginal birth. Trial ID: ISRCTN38829082. 2019. Status: Recruiting. Available from: <http://www.isrctn.com/ISRCTN38829082> [Accessed 11 August 2020].
- 820 ISRCTN Registry. NED: APRIQOT study of performance feedback emailed to endoscopists and endoscopy unit lead clinicians through the National Endoscopy Database (NED) on the endoscopists' detection of polyps. Trial ID: ISRCTN11126923. 2019. Status: Ongoing. Available from: <http://www.isrctn.com/ISRCTN11126923> [Accessed 11 August 2020].
- 821 ISRCTN Registry. The ADDapt diet in reducing Crohn's disease inflammation. Trial ID: ISRCTN14054186. 2019. Status: Recruiting. Available from: <http://www.isrctn.com/ISRCTN14054186> [Accessed 11 August 2020].
- 822 ISRCTN Registry. Patient experience of transitioning between two brands of adalimumab (Humira and a biosimilar Imraldi) in the treatment of adults with Crohn's disease. Trial ID: ISRCTN11094929. 2019. Status: Recruiting. Available from: <http://www.isrctn.com/ISRCTN11094929> [Accessed 11 August 2020].
- 823 ISRCTN Registry. The effect of abdominal massage applied on term newborns receiving phototherapy on transcutaneous bilirubin level. Trial ID: ISRCTN27769096. 2019. Status: Recruiting. Available from: <http://www.isrctn.com/ISRCTN27769096> [Accessed 11 August 2020].
- 824 ISRCTN Registry. Role of AHT#1 food supplement in symptom control of IBS-D. Trial ID: ISRCTN15346028. 2019. Status: Completed. Available from: <http://www.isrctn.com/ISRCTN15346028> [Accessed 11 August 2020].

- 825 ISRCTN Registry. A supported online self-management for symptoms of fatigue- pain and urgency/incontinence in people with inflammatory bowel disease: the IBD-BOOST trial. Trial ID: ISRCTN71618461. 2019. Status: Recruiting. Available from: <http://www.isrctn.com/ISRCTN71618461> [Accessed 11 August 2020].
- 826 ISRCTN Registry. Retrospective chart review study of umbilical cord stem cell therapy for stroke. Trial ID: ISRCTN10678357. 2019. Status: Completed. Available from: <http://www.isrctn.com/ISRCTN10678357> [Accessed 11 August 2020].
- 827 ISRCTN Registry. Pulling forces involved with forceps delivery and its association with maternal injury during birth. Trial ID: ISRCTN18126471. 2019. Status: Recruiting. Available from: <http://www.isrctn.com/ISRCTN18126471> [Accessed 11 August 2020].
- 828 ISRCTN Registry. A study investigating whether hyoscine butylbromide improves image quality of computed tomography (CT) when giving stereotactic ablative radiotherapy (SABR) in the abdomen and pelvis. Trial ID: ISRCTN24362767. 2019. Status: Recruiting. Available from: <http://www.isrctn.com/ISRCTN24362767> [Accessed 11 August 2020].
- 829 ISRCTN Registry. CHRONOS: Comparative health research outcomes of novel surgery in prostate cancer. Trial ID: ISRCTN17796995. 2019. Status: Recruiting. Available from: <http://www.isrctn.com/ISRCTN17796995> [Accessed 11 August 2020].
- 830 ISRCTN Registry. Mobilising vitamin D sequestered in adipose tissue in humans with Exercise (VitaDEX). Trial ID: ISRCTN29195046. 2019. Status: Recruiting. Available from: <http://www.isrctn.com/ISRCTN29195046> [Accessed 11 August 2020].
- 831 UMIN Clinical Trials Registry (UMIN-CTR). Efficacy and feasibility study of the cognitive behavioral therapy program with psychoeducational videos for irritable bowel syndrome. Trial ID: UMIN000036327. 2019. Status: Active- Not Recruiting. Available from: [https://upload.umin.ac.jp/cgi-open-bin/ctr\\_e/ctr\\_view.cgi?recptno=R000041376](https://upload.umin.ac.jp/cgi-open-bin/ctr_e/ctr_view.cgi?recptno=R000041376) [Accessed 11 August 2020].
- 832 Australian New Zealand Clinical Trials Registry (ANZCTR). Prevention of opioid-associated constipation in ventilated intensive care patients. Trial ID: ACTRN12620000207910. 2020. Status: Not Yet Recruiting. Available from: <https://www.anzctr.org.au/Trial/Registration/TrialReview.aspx?id=377536&isReview=true> [Accessed 11 August 2020].
- 833 Australian New Zealand Clinical Trials Registry (ANZCTR). The impact of assessing and treating bile acid malabsorption on function and quality of life in patients with major Low Anterior Resection Syndrome (LARS). Trial ID: ACTRN1262000075932. 2020. Status: Not Yet Recruiting. Available from: <https://www.anzctr.org.au/Trial/Registration/TrialReview.aspx?id=379868&isReview=true> [Accessed 11 August 2020].
- 834 Australian New Zealand Clinical Trials Registry (ANZCTR). Botulinum toxin for the treatment of anal fistulae - a double blinded randomized trial. Trial ID: ACTRN1262000094976. 2020. Status: Not Yet Recruiting. Available from: <https://www.anzctr.org.au/Trial/Registration/TrialReview.aspx?id=378980&isReview=true> [Accessed 11 August 2020].
- 835 Australian New Zealand Clinical Trials Registry (ANZCTR). A randomized controlled study of gut health and Fibre-fix in people with IBS who are on a low FODMAP diet. Trial ID: ACTRN1262000032954. 2020. Status: Not Yet Recruiting. Available from: <https://www.anzctr.org.au/Trial/Registration/TrialReview.aspx?id=378610&isReview=true> [Accessed 11 August 2020].
- 836 Australian New Zealand Clinical Trials Registry (ANZCTR). The Healthy Optimal Australian Microbiome (HOAM) Study. Trial ID: ACTRN12620000106932. 2020. Status: Not Yet Recruiting. Available from: <https://www.anzctr.org.au/Trial/Registration/TrialReview.aspx?id=378844&isReview=true> [Accessed 11 August 2020].
- 837 Clinical Research Information Service (CRIS). Safety and Efficacy of Oral Sulfate Tablet in Patients with Inflammatory Bowel Disease. Trial ID: KCT0004685. 2020. Status: Not Yet Recruiting. Available from: [https://cris.nih.go.kr/cris/en/search/search\\_result\\_st01.jsp?seq=15786](https://cris.nih.go.kr/cris/en/search/search_result_st01.jsp?seq=15786) [Accessed 11 August 2020].
- 838 Clinical Research Information Service (CRIS). infectious surgical site complications after oral antibiotic bowel preparation for minimally-invasive rectal cancer surgery. Trial ID: KCT0004822. 2020. Status: Recruiting. Available from: [https://cris.nih.go.kr/cris/en/search/search\\_result\\_st01.jsp?seq=15964](https://cris.nih.go.kr/cris/en/search/search_result_st01.jsp?seq=15964) [Accessed 11 August 2020].

- 839 Clinical Trials Registry - India (CTRI). Effect of Darvyadi lauha in the management of Kamala with respect to Hepatocellular jaundice. Trial ID: CTRI/2020/02/023545. 2020. Status: Not Available. Available from: <http://ctri.nic.in/Clinicaltrials/pmaindet2.php?trialid=41504> [Accessed 11 August 2020].
- 840 Clinical Trials Registry - India (CTRI). Comparison of acute toxicities and clinical outcome in locally advanced cervical cancer patients treated with two different radiation techniques. Trial ID: CTRI/2020/03/023923. 2020. Status: Not Available. Available from: <http://ctri.nic.in/Clinicaltrials/pmaindet2.php?trialid=41089> [Accessed 11 August 2020].
- 841 Clinical Trials Registry - India (CTRI). TESTING PATIENTS CONTROL OVER FLATUS- LIQUID OR SOLID STOOL. Trial ID: CTRI/2020/02/023604. 2020. Status: Not Available. Available from: <http://ctri.nic.in/Clinicaltrials/pmaindet2.php?trialid=40830> [Accessed 11 August 2020].
- 842 Clinicaltrials.gov. Efficacy and Safety of Vibrant Capsule vs. Vibrant Placebo for the Treatment of Chronic Idiopathic Constipation (CIC) (CIC). Trial ID: NCT04458675. 2020. Status: Completed. Available from: <https://clinicaltrials.gov/ct2/show/record/NCT04458675> [Accessed 11 August 2020].
- 843 Clinicaltrials.gov. ERAS Program Items Adherence- PROMs and RIOT After Colorectal Surgery (iCral3). Trial ID: NCT04397627. 2020. Status: Not Yet Recruiting. Available from: <https://clinicaltrials.gov/ct2/show/record/NCT04397627> [Accessed 11 August 2020].
- 844 Clinicaltrials.gov. Effect of an 8-week Bifidobacterium Lactis HN019 Supplementation on Functional Constipation (BifidoDigest). Trial ID: NCT04231162. 2020. Status: Not Yet Recruiting. Available from: <https://clinicaltrials.gov/ct2/show/record/NCT04231162> [Accessed 11 August 2020].
- 845 Clinicaltrials.gov. Evaluation of the Effect of Changyou Probiotic Flavored Yogurt on Intestinal Health. Trial ID: NCT04375475. 2020. Status: Completed. Available from: <https://clinicaltrials.gov/ct2/show/record/NCT04375475> [Accessed 11 August 2020].
- 846 Clinicaltrials.gov. The Effect of Kinesio Taping and Breathing Exercises on Pain Management. Trial ID: NCT04412122. 2020. Status: Completed. Available from: <https://clinicaltrials.gov/ct2/show/record/NCT04412122> [Accessed 11 August 2020].
- 847 Clinicaltrials.gov. SERum-bank for PANcreatic Cancer (SERPAN). Trial ID: NCT04374175. 2020. Status: Recruiting. Available from: <https://clinicaltrials.gov/ct2/show/record/NCT04374175> [Accessed 11 August 2020].
- 848 Clinicaltrials.gov. Durvalumab for Advanced Hepatocellular Carcinoma in Patients With Active Chronic Hepatitis B Virus Infection. Trial ID: NCT04294498. 2020. Status: Not Yet Recruiting. Available from: <https://clinicaltrials.gov/ct2/show/record/NCT04294498> [Accessed 11 August 2020].
- 849 Clinicaltrials.gov. Abemaciclib With or Without T-DM1 for the Treatment of HER2-Positive Metastatic Breast Cancer. Trial ID: NCT04351230. 2020. Status: Not Yet Recruiting. Available from: <https://clinicaltrials.gov/ct2/show/record/NCT04351230> [Accessed 11 August 2020].
- 850 Clinicaltrials.gov. Neurovascular Complications and White Matter Damage in Acquired Anemias. Trial ID: NCT04320966. 2020. Status: Not Yet Recruiting. Available from: <https://clinicaltrials.gov/ct2/show/record/NCT04320966> [Accessed 11 August 2020].
- 851 Clinicaltrials.gov. Anal Sphincter Reconstruction After High Recurrent Anorectal Fistula Excision. Trial ID: NCT04357210. 2020. Status: Completed. Available from: <https://clinicaltrials.gov/ct2/show/record/NCT04357210> [Accessed 11 August 2020].
- 852 Clinicaltrials.gov. The Impact of a Combination of Bifidobacterium Longum 35624 and 1714 Strains in Adults With Irritable Bowel Syndrome (IBS). Trial ID: NCT04422327. 2020. Status: Completed. Available from: <https://clinicaltrials.gov/ct2/show/record/NCT04422327> [Accessed 11 August 2020].
- 853 Clinicaltrials.gov. Dupilumab Skin Barrier Function Study in Atopic Dermatitis (BALISTAD). Trial ID: NCT04447417. 2020. Status: Not Yet Recruiting. Available from: <https://clinicaltrials.gov/ct2/show/record/NCT04447417> [Accessed 11 August 2020].

- 854 Clinicaltrials.gov. Acupuncture for the Treatment of Intravesical BCG-Related Adverse Events in High-Risk Non-muscle Invasive Bladder Cancer. Trial ID: NCT04496219. 2020. Status: Not Yet Recruiting. Available from: <https://clinicaltrials.gov/ct2/show/record/NCT04496219> [Accessed 11 August 2020].
- 855 Clinicaltrials.gov. Clinical Trial of Efficacy and Safety of MMH-MAP in the Treatment of Cognitive Disorders. Trial ID: NCT04295681. 2020. Status: Recruiting. Available from: <https://clinicaltrials.gov/ct2/show/record/NCT04295681> [Accessed 11 August 2020].
- 856 Clinicaltrials.gov. Austrian CoronaVirus Adaptive Clinical Trial (ACOVACT). Trial ID: NCT04351724. 2020. Status: Recruiting. Available from: <https://clinicaltrials.gov/ct2/show/record/NCT04351724> [Accessed 11 August 2020].
- 857 Clinicaltrials.gov. A Study to Evaluate the Impact of Care4Today IBD- a Smart System to Facilitate the Management of Crohn's Disease by Patients and Health Care Providers. Trial ID: NCT04232228. 2020. Status: Not Yet Recruiting. Available from: <https://clinicaltrials.gov/ct2/show/record/NCT04232228> [Accessed 11 August 2020].
- 858 Clinicaltrials.gov. High-impact Exercise in Adults With Crohn's Disease (IMPACT CD). Trial ID: NCT04273399. 2020. Status: Not Yet Recruiting. Available from: <https://clinicaltrials.gov/ct2/show/record/NCT04273399> [Accessed 11 August 2020].
- 859 Clinicaltrials.gov. 18F-FDG and 68Ga-FAPI PET/CT in Crohn's Disease. Trial ID: NCT04502303. 2020. Status: Not Yet Recruiting. Available from: <https://clinicaltrials.gov/ct2/show/record/NCT04502303> [Accessed 11 August 2020].
- 860 Clinicaltrials.gov. Investigation of Eluxadoline for Diabetic Diarrhea. Trial ID: NCT04313088. 2020. Status: Not Yet Recruiting. Available from: <https://clinicaltrials.gov/ct2/show/record/NCT04313088> [Accessed 11 August 2020].
- 861 Clinicaltrials.gov. Neoadjuvant Study Chemotherapy vs Letrozole + Abemaciclib in HR+/HER2- High/Intermediate Risk Breast Cancer Patients (CARABELA). Trial ID: NCT04293393. 2020. Status: Not Yet Recruiting. Available from: <https://clinicaltrials.gov/ct2/show/record/NCT04293393> [Accessed 11 August 2020].
- 862 Clinicaltrials.gov. De-escalated Conformal Radiation Expedited Sequentially With Chemotherapy for Endometrial Cancer (DeCRESEndo). Trial ID: NCT04386993. 2020. Status: Not Yet Recruiting. Available from: <https://clinicaltrials.gov/ct2/show/record/NCT04386993> [Accessed 11 August 2020].
- 863 Clinicaltrials.gov. The Correlation Between Gut Microbiome-host Interaction and Ventricular Arrhythmias. Trial ID: NCT04447365. 2020. Status: Not Yet Recruiting. Available from: <https://clinicaltrials.gov/ct2/show/record/NCT04447365> [Accessed 11 August 2020].
- 864 Clinicaltrials.gov. Assessment of Changes in Vaginal Microbiota Profiles Before and After Vaginal Urogynecologic Surgery (VAGIBIOTE). Trial ID: NCT04301401. 2020. Status: Recruiting. Available from: <https://clinicaltrials.gov/ct2/show/record/NCT04301401> [Accessed 11 August 2020].
- 865 Clinicaltrials.gov. Dose-Escalated Hypofractionated Adaptive Radiotherapy for Head and Neck Cancer (DEHART). Trial ID: NCT04477759. 2020. Status: Not Yet Recruiting. Available from: <https://clinicaltrials.gov/ct2/show/record/NCT04477759> [Accessed 11 August 2020].
- 866 Clinicaltrials.gov. Stools and Life Habits Collection in Healthy Volunteers/Subjects - to Provide Material for in Vitro Model Development (PEPSIIN). Trial ID: NCT04301973. 2020. Status: Not Yet Recruiting. Available from: <https://clinicaltrials.gov/ct2/show/record/NCT04301973> [Accessed 11 August 2020].
- 867 Clinicaltrials.gov. ATHN Transcends: A Natural History Study of Non-Neoplastic Hematologic Disorders. Trial ID: NCT04398628. 2020. Status: Not Yet Recruiting. Available from: <https://clinicaltrials.gov/ct2/show/record/NCT04398628> [Accessed 11 August 2020].
- 868 Clinicaltrials.gov. Upper Extremity Robotic Rehabilitation in Patients With Hemiplegia. Trial ID: NCT04393480. 2020. Status: Completed. Available from: <https://clinicaltrials.gov/ct2/show/record/NCT04393480> [Accessed 11 August 2020].

- 869 Clinicaltrials.gov. Gut Butyrate and Blood Pressure in African Americans. Trial ID: NCT04415333. 2020. Status: Not Yet Recruiting. Available from: <https://clinicaltrials.gov/ct2/show/record/NCT04415333> [Accessed 11 August 2020].
- 870 Clinicaltrials.gov. The Effect of Joint Transition Visits on Quality of Life in Inflammatory Bowel Diseases (TRANS-IBD) (TRANS-IBD). Trial ID: NCT04290156. 2020. Status: Not Yet Recruiting. Available from: <https://clinicaltrials.gov/ct2/show/record/NCT04290156> [Accessed 11 August 2020].
- 871 Clinicaltrials.gov. Effect and Tolerance of a Probiotic-based Medical Device Administered to Patients With Irritable Bowel Syndrome (Lactiplus). Trial ID: NCT04324658. 2020. Status: Recruiting. Available from: <https://clinicaltrials.gov/ct2/show/record/NCT04324658> [Accessed 11 August 2020].
- 872 Clinicaltrials.gov. Impact of a Yoga Intervention on Pain and Multiomics in Participants With IBS. Trial ID: NCT04315714. 2020. Status: Not Yet Recruiting. Available from: <https://clinicaltrials.gov/ct2/show/record/NCT04315714> [Accessed 11 August 2020].
- 873 Clinicaltrials.gov. Efficacy and Safety of Changkang Granule in the Treatment of Diarrhea-predominant Irritable Bowel Syndrome (IBS-D). Trial ID: NCT04492787. 2020. Status: Recruiting. Available from: <https://clinicaltrials.gov/ct2/show/record/NCT04492787> [Accessed 11 August 2020].
- 874 Clinicaltrials.gov. Malnutrition in Chronic Gastrointestinal Diseases- Cross-sectional Study. Trial ID: NCT04474743. 2020. Status: Recruiting. Available from: <https://clinicaltrials.gov/ct2/show/record/NCT04474743> [Accessed 11 August 2020].
- 875 Clinicaltrials.gov. Lorlatinib Combinations in Lung Cancer. Trial ID: NCT04292119. 2020. Status: Not Yet Recruiting. Available from: <https://clinicaltrials.gov/ct2/show/record/NCT04292119> [Accessed 11 August 2020].
- 876 Clinicaltrials.gov. Testing of TAK228 (MLN0128- Sapanisertib) Plus Docetaxel to the Usual Standard of Care for Advanced Squamous Cell Lung Cancer (A Lung-MAP Treatment Trial). Trial ID: NCT04267913. 2020. Status: Not Yet Recruiting. Available from: <https://clinicaltrials.gov/ct2/show/record/NCT04267913> [Accessed 11 August 2020].
- 877 Clinicaltrials.gov. A Study of NIVO Plus IPI and Guadecitabine or NIVO Plus IPI in Melanoma and NSCLC Resistant to Anti-PD1/PDL1 (NIBIT-ML1). Trial ID: NCT04250246. 2020. Status: Not Yet Recruiting. Available from: <https://clinicaltrials.gov/ct2/show/record/NCT04250246> [Accessed 11 August 2020].
- 878 Clinicaltrials.gov. Testing the Addition of an Anti-cancer Immune Therapy Drug (Nivolumab) to the Usual Chemotherapy Treatment (Cisplatin or Carboplatin With Gemcitabine) for Recurrent or Metastatic Nasopharyngeal Cancer. Trial ID: NCT04458909. 2020. Status: Not Yet Recruiting. Available from: <https://clinicaltrials.gov/ct2/show/record/NCT04458909> [Accessed 11 August 2020].
- 879 Clinicaltrials.gov. Study to Assess Effectiveness of Therapy Timely Adjustment Based on Self-monitoring in Patients Suffering From Mild-to-moderate Ulcerative Colitis (OPTIMISE Study) (OPTIMISE). Trial ID: NCT04340895. 2020. Status: Recruiting. Available from: <https://clinicaltrials.gov/ct2/show/record/NCT04340895> [Accessed 11 August 2020].
- 880 Clinicaltrials.gov. Study of Multiple Ascending Dose of KBL693 in Healthy Participants. Trial ID: NCT04307173. 2020. Status: Not Yet Recruiting. Available from: <https://clinicaltrials.gov/ct2/show/record/NCT04307173> [Accessed 11 August 2020].
- 881 Clinicaltrials.gov. MOWOOT Device to Treat Constipation in Adults. Trial ID: NCT04262752. 2020. Status: Completed. Available from: <https://clinicaltrials.gov/ct2/show/record/NCT04262752> [Accessed 11 August 2020].
- 882 Clinicaltrials.gov. Study of Durvalumab Following Radiation Therapy in Patients With Stage 3 Unresectable NSCLC Ineligible for Chemotherapy (DUART). Trial ID: NCT04249362. 2020. Status: Not Yet Recruiting. Available from: <https://clinicaltrials.gov/ct2/show/record/NCT04249362> [Accessed 11 August 2020].
- 883 Clinicaltrials.gov. Flexible-Dose Trial in Early Parkinson's Disease (PD) (TEMPO-2). Trial ID: NCT04223193. 2020. Status: Recruiting. Available from: <https://clinicaltrials.gov/ct2/show/record/NCT04223193> [Accessed 11 August 2020].

- 884 Clinicaltrials.gov. Emsella Chair Versus Sham for the Treatment of Chronic Pelvic Pain (EmsellaPain). Trial ID: NCT04248491. 2020. Status: Recruiting. Available from: <https://clinicaltrials.gov/ct2/show/record/NCT04248491> [Accessed 11 August 2020].
- 885 Clinicaltrials.gov. Isatuximab in Combination With Lenalidomide and Dexamethasone in High-risk Smoldering Multiple Myeloma. Trial ID: NCT04270409. 2020. Status: Not Yet Recruiting. Available from: <https://clinicaltrials.gov/ct2/show/record/NCT04270409> [Accessed 11 August 2020].
- 886 Clinicaltrials.gov. Relevance of Ultrasound Screening for Foetal Macrosomia (USmacro). Trial ID: NCT04443205. 2020. Status: Not Yet Recruiting. Available from: <https://clinicaltrials.gov/ct2/show/record/NCT04443205> [Accessed 11 August 2020].
- 887 Clinicaltrials.gov. Enhancing Survivorship Care Planning for Patients With Localized Prostate Cancer Using A Couple-focused Web-based Tailored Symptom Self-management Program (SCP). Trial ID: NCT04350788. 2020. Status: Completed. Available from: <https://clinicaltrials.gov/ct2/show/record/NCT04350788> [Accessed 11 August 2020].
- 888 Clinicaltrials.gov. MRI-guided Focal Laser Ablation (Unicorn). Trial ID: NCT04379362. 2020. Status: Recruiting. Available from: <https://clinicaltrials.gov/ct2/show/record/NCT04379362> [Accessed 11 August 2020].
- 889 Clinicaltrials.gov. Genomics in Michigan to AdJust Outcomes in Prostate cancer (G-MAJOR) for Men With Newly Diagnosed Favorable Risk Prostate Cancer. Trial ID: NCT04396808. 2020. Status: Not Yet Recruiting. Available from: <https://clinicaltrials.gov/ct2/show/record/NCT04396808> [Accessed 11 August 2020].
- 890 Clinicaltrials.gov. Epidiolex (CBD) in Patients With Biochemically Recurrent Prostate Cancer. Trial ID: NCT04428203. 2020. Status: Not Yet Recruiting. Available from: <https://clinicaltrials.gov/ct2/show/record/NCT04428203> [Accessed 11 August 2020].
- 891 Clinicaltrials.gov. Development and Evaluation of a Web-based Programme on Relapse Management for People With Multiple Sclerosis (POWER@MS2). Trial ID: NCT04233970. 2020. Status: Not Yet Recruiting. Available from: <https://clinicaltrials.gov/ct2/show/record/NCT04233970> [Accessed 11 August 2020].
- 892 Clinicaltrials.gov. Investigation of Acute Effects of Myofascial Trigger Point Release in Women With Chronic Pelvic Pain. Trial ID: NCT04401566. 2020. Status: Active- Not Recruiting. Available from: <https://clinicaltrials.gov/ct2/show/record/NCT04401566> [Accessed 11 August 2020].
- 893 Clinicaltrials.gov. FMT as a Treatment for Severe Motility Disorder. Trial ID: NCT04373252. 2020. Status: Not Yet Recruiting. Available from: <https://clinicaltrials.gov/ct2/show/record/NCT04373252> [Accessed 11 August 2020].
- 894 Clinicaltrials.gov. Proof of Concept Study in Patients With Short Bowel Syndrome. Trial ID: NCT04379856. 2020. Status: Not Yet Recruiting. Available from: <https://clinicaltrials.gov/ct2/show/record/NCT04379856> [Accessed 11 August 2020].
- 895 Clinicaltrials.gov. Comparison of High-Dose Rate Brachytherapy and Stereotactic Ablative Radiotherapy as Monotherapy for the Treatment of Localized Prostate Cancer. Trial ID: NCT04253483. 2020. Status: Recruiting. Available from: <https://clinicaltrials.gov/ct2/show/record/NCT04253483> [Accessed 11 August 2020].
- 896 Clinicaltrials.gov. A Single-Blind- Randomized Study to Compare fCO2 Laser Therapy Versus Sham for Treatment of SUI in Women (LaserSUI). Trial ID: NCT04253067. 2020. Status: Not Yet Recruiting. Available from: <https://clinicaltrials.gov/ct2/show/record/NCT04253067> [Accessed 11 August 2020].
- 897 Clinicaltrials.gov. Evaluate Safety and Efficacy of Anaerobic Cultivated Human Intestinal Microbiome Transplantation in Systemic Sclerosis (ReSScue) Transplantation in Systemic Sclerosis (ReSScue). Trial ID: NCT04300426. 2020. Status: Not Yet Recruiting. Available from: <https://clinicaltrials.gov/ct2/show/record/NCT04300426> [Accessed 11 August 2020].
- 898 Clinicaltrials.gov. Upfront Autologous HSCT Versus Immunosuppression in Early Diffuse Cutaneous Systemic Sclerosis (UPSIDE). Trial ID: NCT04464434. 2020. Status: Not Yet Recruiting. Available from: <https://clinicaltrials.gov/ct2/show/record/NCT04464434> [Accessed 11 August 2020].

- 899 Clinicaltrials.gov. Ligation of Intersphincteric Track (LIFT) Versus Fistulectomy in Trans-sphincteric Anal Ffistula. (professor). Trial ID: NCT04351074. 2020. Status: Completed. Available from: <https://clinicaltrials.gov/ct2/show/record/NCT04351074> [Accessed 11 August 2020].
- 900 Clinicaltrials.gov. Study of OST-122 in Patients With Moderate to Severe Ulcerative Colitis. Trial ID: NCT04353791. 2020. Status: Not Yet Recruiting. Available from: <https://clinicaltrials.gov/ct2/show/record/NCT04353791> [Accessed 11 August 2020].
- 901 Clinicaltrials.gov. Boosting Biologics in UC. Trial ID: NCT04241029. 2020. Status: Recruiting. Available from: <https://clinicaltrials.gov/ct2/show/record/NCT04241029> [Accessed 11 August 2020].
- 902 Clinicaltrials.gov. Urinary Incontinence and Sedentary Behaviour in Nursing Homes (OsoNaH). Trial ID: NCT04297904. 2020. Status: Recruiting. Available from: <https://clinicaltrials.gov/ct2/show/record/NCT04297904> [Accessed 11 August 2020].
- 903 Clinicaltrials.gov. Gut Microbiome and Ventricular Arrhythmias. Trial ID: NCT04466072. 2020. Status: Not Yet Recruiting. Available from: <https://clinicaltrials.gov/ct2/show/record/NCT04466072> [Accessed 11 August 2020].
- 904 Clinicaltrials.gov. Digital Intelligent Assistant for Nursing Application (DIANA). Trial ID: NCT04393272. 2020. Status: Not Yet Recruiting. Available from: <https://clinicaltrials.gov/ct2/show/record/NCT04393272> [Accessed 11 August 2020].
- 905 Clinicaltrials.gov. Faecal Incontinence in Prostate Cancer Survivors Treated Whith Radiotherapy. Trial ID: NCT04262609. 2020. Status: Not Yet Recruiting. Available from: <https://clinicaltrials.gov/ct2/show/record/NCT04262609> [Accessed 11 August 2020].
- 906 Clinicaltrials.gov. Mediolateral Episiotomy and Obstetric Anal Sphincter Injuries in Instrumental Delivery (INSTRUMODA). Trial ID: NCT04446780. 2020. Status: Not Yet Recruiting. Available from: <https://clinicaltrials.gov/ct2/show/record/NCT04446780> [Accessed 11 August 2020].
- 907 ISRCTN Registry. The PLUG Study A Feasibility Study Investigating the Prevention of Post-operative Gastro-oesophageal Anastomotic Leaks with the use of a Surgical Adhesive- BioGlue. Trial ID: ISRCTN26729280. 2020. Status: Recruiting. Available from: <http://www.isrctn.com/ISRCTN26729280> [Accessed 11 August 2020].
- 908 ISRCTN Registry. Identifying potential medical causes of fatigue- pain and urgency in inflammatory bowel disease and optimising medical management of these causes. Trial ID: ISRCTN15380317. 2020. Status: Recruiting. Available from: <http://www.isrctn.com/ISRCTN15380317> [Accessed 11 August 2020].
- 909 ISRCTN Registry. The effect of the enhanced recovery after surgery (ERAS) program on length of stay among abdominal surgery patients at Mbarara Regional Referral Hospital- Uganda. Trial ID: ISRCTN62342149. 2020. Status: Completed. Available from: <http://www.isrctn.com/ISRCTN62342149> [Accessed 11 August 2020].
- 910 ISRCTN Registry. APPEAL: Antenatal preventative pelvic floor muscle exercise intervention led by midwives to reduce postnatal urinary incontinence. Trial ID: ISRCTN10833250. 2020. Status: Ongoing. Available from: <http://www.isrctn.com/ISRCTN10833250> [Accessed 11 August 2020].
- 911 ISRCTN Registry. A clinical trial using a pragmatic randomised design to test new interventions in prostate diseases. Trial ID: ISRCTN11095538. 2020. Status: Not Yet Recruiting. Available from: <http://www.isrctn.com/ISRCTN11095538> [Accessed 11 August 2020].
- 912 ISRCTN Registry. MODULATE: a study to evaluate the effectiveness of either amitriptyline- ondansetron- loperamide- or dietary intervention (the low FODMAP diet) against standard dietary advice for the treatment of diarrhoea in patients with stable ulcerative colitis. Trial ID: ISRCTN16086699. 2020. Status: Not Yet Recruiting. Available from: <http://www.isrctn.com/ISRCTN16086699> [Accessed 11 August 2020].
- 913 ISRCTN Registry. Development of a manual to guide care for people with incontinence to prevent or treat incontinence associated dermatitis (sore skin)- Part 1 and 2. Trial ID: ISRCTN26169429. 2020. Status: Not Yet Recruiting. Available from: <http://www.isrctn.com/ISRCTN26169429> [Accessed 11 August 2020].

- 914 UMIN Clinical Trials Registry (UMIN-CTR). Research on excretory and sexual function in patients with Marfan- Loeyes-Dietz and Ehlers-Danlos syndromes. Trial ID: UMIN000040629. 2020. Status: Not Yet Recruiting. Available from: [https://upload.umin.ac.jp/cgi-open-bin/ctr\\_e/ctr\\_view.cgi?recptno=R000046370](https://upload.umin.ac.jp/cgi-open-bin/ctr_e/ctr_view.cgi?recptno=R000046370) [Accessed 11 August 2020].
- 915 UMIN Clinical Trials Registry (UMIN-CTR). The psychology of patients before and after implantation biofeedback therapy after stoma closure surgery -Suevey on patients with ultra low anterior resection and intersphincteric resection-. Trial ID: UMIN000040697. 2020. Status: Active- Not Recruiting. Available from: [https://upload.umin.ac.jp/cgi-open-bin/ctr\\_e/ctr\\_view.cgi?recptno=R000046458](https://upload.umin.ac.jp/cgi-open-bin/ctr_e/ctr_view.cgi?recptno=R000046458) [Accessed 11 August 2020].
- 916 Clinicaltrials.gov. Effects of Botox in Obstructed Defecation Syndrome. Trial ID: NCT02160288. 2014. Status: Other. Available from: <https://clinicaltrials.gov/ct2/show/record/NCT02160288> [Accessed 11 August 2020].
- 917 Clinicaltrials.gov. Short Term Outcomes of Robotic-assisted Intersphincteric Resection for Low Rectal Cancer (R-ISR). Trial ID: NCT03597126. 2018. Status: Not Yet Recruiting. Available from: <https://clinicaltrials.gov/ct2/show/record/NCT03597126> [Accessed 11 August 2020].
- 918 Clinicaltrials.gov. Assessment of Faecal Incontinence With MAPLe. Trial ID: NCT03969069. 2019. Status: Recruiting. Available from: <https://clinicaltrials.gov/ct2/show/record/NCT03969069> [Accessed 11 August 2020].
- 919 ISRCTN Registry. Missed obstetric anal sphincter injury following vaginal delivery in primiparous women. Trial ID: ISRCTN18006760. 2016. Status: Completed. Available from: <http://www.isrctn.com/ISRCTN18006760> [Accessed 11 August 2020].
- 920 Clinicaltrials.gov. Intra-anal Oxymetazoline in Healthy Adult Volunteers. Trial ID: NCT03529487. 2018. Status: Recruiting. Available from: <https://clinicaltrials.gov/ct2/show/record/NCT03529487> [Accessed 11 August 2020].
- 921 Clinicaltrials.gov. Effects of Single Dose Citalopram and Reboxetine on Urethral and Anal Closure Function on Healthy Female Subjects. Trial ID: NCT04097288. 2019. Status: Recruiting. Available from: <https://clinicaltrials.gov/ct2/show/record/NCT04097288> [Accessed 11 August 2020].
- 922 Clinicaltrials.gov. Evaluating the Impact of Automated Evaluation of Gastrointestinal Symptoms (AEGIS) on Clinical Outcomes (AEGIS). Trial ID: NCT02530216. 2015. Status: Completed. Available from: <https://clinicaltrials.gov/ct2/show/record/NCT02530216> [Accessed 11 August 2020].
- 923 Clinicaltrials.gov. Development of an Intelligent POWER Rehabilitation Cluster Machine and Its Clinical Testing and Assessment. Trial ID: NCT02685839. 2016. Status: Other. Available from: <https://clinicaltrials.gov/ct2/show/record/NCT02685839> [Accessed 11 August 2020].
- 924 Clinicaltrials.gov. Turkish Version of Childhood Bladder and Bowel Dysfunction Questionnaire. Trial ID: NCT03742570. 2018. Status: Completed. Available from: <https://clinicaltrials.gov/ct2/show/record/NCT03742570> [Accessed 11 August 2020].
- 925 Clinicaltrials.gov. Screening for Emotional- Behavioral and Developmental Disorders in Children With Functional Constipation. Trial ID: NCT03614000. 2018. Status: Recruiting. Available from: <https://clinicaltrials.gov/ct2/show/record/NCT03614000> [Accessed 11 August 2020].
- 926 Clinicaltrials.gov. Fecal Incontinence Type Assessment Scale. Trial ID: NCT04410822. 2020. Status: Recruiting. Available from: <https://clinicaltrials.gov/ct2/show/record/NCT04410822> [Accessed 11 August 2020].
- 927 ISRCTN Registry. Postal questionnaire data collection pilot study - APPEAL pilot study. Trial ID: ISRCTN99859966. 2018. Status: Completed. Available from: <http://www.isrctn.com/ISRCTN99859966> [Accessed 11 August 2020].
- 928 UMIN Clinical Trials Registry (UMIN-CTR). Validation of the Japanese Low Anterior Resection Syndrome(LARS) score as a self-administered questionnaire for postoperative bowel dysfunction after rectal cancer surgery: a multi-center prospective observational study. Trial ID: UMIN000035271. 2018. Status: Completed. Available from: [https://upload.umin.ac.jp/cgi-open-bin/ctr\\_e/ctr\\_view.cgi?recptno=R000040184](https://upload.umin.ac.jp/cgi-open-bin/ctr_e/ctr_view.cgi?recptno=R000040184) [Accessed 11 August 2020].

- 929 Clinicaltrials.gov. Faecal Incontinence iNtervention Study (FINS). Trial ID: NCT02355834. 2014. Status: Completed. Available from: <https://clinicaltrials.gov/ct2/show/record/NCT02355834> [Accessed 11 August 2020].
- 930 Clinicaltrials.gov. Transverse Coloplasty vs. Side-to-end Anastomosis Following Low Anterior Resection (LAR): CSAR Trial (CSAR). Trial ID: NCT03074461. 2017. Status: Other. Available from: <https://clinicaltrials.gov/ct2/show/record/NCT03074461> [Accessed 11 August 2020].
- 931 Clinicaltrials.gov. Evaluation of Ocoxin -Viusid in Metastatic Colorectal Adenocarcinoma. Trial ID: NCT03559543. 2018. Status: Recruiting. Available from: <https://clinicaltrials.gov/ct2/show/record/NCT03559543> [Accessed 11 August 2020].
- 932 Clinicaltrials.gov. Quality of Life Related to Digestive Symptoms After Cholecistectomy. Short Term Effects of a Low Fat Intake. Trial ID: NCT03883464. 2019. Status: Completed. Available from: <https://clinicaltrials.gov/ct2/show/record/NCT03883464> [Accessed 11 August 2020].
- 933 Clinicaltrials.gov. Lateral Episiotomy or Not in Vacuum Assisted Delivery in Non-parous Women (EVA). Trial ID: NCT02643108. 2015. Status: Recruiting. Available from: <https://clinicaltrials.gov/ct2/show/record/NCT02643108> [Accessed 11 August 2020].
- 934 Clinicaltrials.gov. Effect of Local Anesthesia on Postoperative Pain Following Sacrospinous Ligament Fixation. Trial ID: NCT02890199. 2016. Status: Other. Available from: <https://clinicaltrials.gov/ct2/show/record/NCT02890199> [Accessed 11 August 2020].
- 935 Clinicaltrials.gov. Clinical Research on Bowel Symptoms of Patient With Pelvic Organ Prolapse. Trial ID: NCT02731391. 2016. Status: Other. Available from: <https://clinicaltrials.gov/ct2/show/record/NCT02731391> [Accessed 11 August 2020].
- 936 Clinicaltrials.gov. Baclofen/Diazepam Supps for Treatment of Pelvic Floor Myalgia (BDS). Trial ID: NCT03427216. 2018. Status: Not Yet Recruiting. Available from: <https://clinicaltrials.gov/ct2/show/record/NCT03427216> [Accessed 11 August 2020].
- 937 Clinicaltrials.gov. Minimally Invasive Burch Colposuspension to Reduce Occult Stress Incontinence (MICRO). Trial ID: NCT03841513. 2019. Status: Recruiting. Available from: <https://clinicaltrials.gov/ct2/show/record/NCT03841513> [Accessed 11 August 2020].

**Appendix 5: Included trials**

| Parent code                                         | Child code                                                     | n  | References                                          |
|-----------------------------------------------------|----------------------------------------------------------------|----|-----------------------------------------------------|
| <b>Bowel management</b>                             |                                                                |    |                                                     |
|                                                     | General                                                        |    |                                                     |
|                                                     | Assistive techniques                                           | 5  | 145-149                                             |
|                                                     | Bowel habit/retraining                                         |    |                                                     |
|                                                     | Complementary therapies                                        | 17 | 82-89,91-98,100                                     |
|                                                     | Dietary management                                             | 4  | 152-155                                             |
|                                                     | Education                                                      | 6  | 158-163                                             |
|                                                     | Electrical stimulation                                         | 13 | 91,99-103,105-111                                   |
|                                                     | Lifestyle                                                      | 9  | 153,159,161,162,174-178                             |
|                                                     | Magnetic stimulation                                           | 3  | 99,179,180                                          |
|                                                     | Pelvic floor muscle training/ biofeedback/ sphincter exercises | 13 | 96,101,103,113-122                                  |
|                                                     | Physiotherapy                                                  | 2  | 186,187                                             |
|                                                     | Psychological/ behavioural/ urgency suppression techniques     | 3  | 145,159,162                                         |
|                                                     | Self-management                                                | 4  | 145,158,159,162                                     |
|                                                     | Volumetric/breathing exercises                                 | 0  |                                                     |
|                                                     | Weight management                                              | 0  |                                                     |
| <b>Bowel management for neurological conditions</b> |                                                                |    |                                                     |
|                                                     | Anticholinesterase plus an anticholinergic drug                | 1  | 189                                                 |
|                                                     | Assistive techniques                                           | 2  | 193,194                                             |
|                                                     | Bowel programmes/ bowel care                                   | 1  | 195                                                 |
|                                                     | Devices                                                        | 0  |                                                     |
|                                                     | Electrical stimulation                                         | 2  | 196,197                                             |
|                                                     | Fibre                                                          | 0  |                                                     |
|                                                     | Physiotherapy                                                  | 5  | 178,198-201                                         |
|                                                     | Surgery                                                        | 5  | 104,131,133,202,203                                 |
| <b>Bowel and bladder dysfunction</b>                |                                                                |    |                                                     |
|                                                     | Bladder pain syndrome                                          | 0  |                                                     |
|                                                     | Constipation (including in children)                           | 27 | 82,125,158,206-215 84-87,89,93,94,97,98,102,216-220 |

|                |                                                                    |    |                                |
|----------------|--------------------------------------------------------------------|----|--------------------------------|
|                | FI and delayed toilet training as a result of chronic constipation | 0  |                                |
|                | FI in children                                                     | 0  |                                |
|                | Link between constipation and urinary incontinence                 | 0  |                                |
|                | Urinary and/or FI                                                  | 5  | 177,222-225                    |
| <b>Drugs</b>   |                                                                    |    |                                |
|                | General                                                            | 0  |                                |
|                | Anti-diarrhoeal agents                                             | 0  |                                |
|                | Botulinum toxin type A                                             | 1  | 227                            |
|                | Clonidine                                                          | 0  |                                |
|                | Drugs acting on anal sphincter tone                                | 0  |                                |
|                | Enemas                                                             | 2  | 228,229                        |
|                | Fibre                                                              | 0  |                                |
|                | Laxatives                                                          | 8  | 85,100,207,210,211,214,219,220 |
|                | Oestrogen therapy                                                  | 0  |                                |
|                | Pipeline drugs                                                     | 2  | 125,206                        |
|                | Repurposed drugs                                                   | 11 | 91,94,208-214,231,232          |
|                | Stool-forming agents                                               | 0  |                                |
|                | Suppositories                                                      | 2  | 146,233                        |
| <b>Surgery</b> |                                                                    |    |                                |
|                | General                                                            | 0  |                                |
|                | Antegrade irrigation                                               | 0  |                                |
|                | Artificial anal sphincter                                          | 1  | 236                            |
|                | Bariatric surgery                                                  | 0  |                                |
|                | Dynamic graciloplasty                                              | 0  |                                |
|                | Gluteoplasty                                                       | 0  |                                |
|                | Injectable bulking agents                                          | 3  | 114,132,247                    |
|                | Levatorplasty (anterior) - repairing the pelvic floor              | 0  |                                |
|                | Magnetic sphincter formation                                       | 1  | 248                            |
|                | Microballoons                                                      | 0  |                                |
|                | Muscle transposition                                               | 0  |                                |
|                | New surgical procedures                                            | 1  | 250                            |
|                | Ostomies (colostomy and ileostomy)                                 | 0  |                                |
|                | Post anal repair                                                   | 0  |                                |

|                                                                        |                                                     |    |                         |
|------------------------------------------------------------------------|-----------------------------------------------------|----|-------------------------|
|                                                                        | Posterior tibial nerve stimulation                  | 1  | 252                     |
|                                                                        | Radiofrequency                                      | 1  | 253                     |
|                                                                        | Repair of posterior compartment prolapse            | 0  |                         |
|                                                                        | Repair of rectal prolapse                           | 2  | 218,260                 |
|                                                                        | Sacral nerve stimulation (implanted)                | 12 | 114,202,203,248,263-270 |
|                                                                        | Slings                                              | 0  |                         |
|                                                                        | Sphincteroplasty                                    | 1  | 272                     |
|                                                                        | Sphincter repair                                    | 0  |                         |
|                                                                        | Stem cells                                          | 3  | 104,131,133             |
|                                                                        | Total pelvic floor repair (TPFR)                    | 0  |                         |
| <b>Models of care</b>                                                  |                                                     |    |                         |
|                                                                        | Clinical pathway to diagnosis                       | 0  |                         |
|                                                                        | Evidence-based practice                             | 0  |                         |
|                                                                        | General - models of care                            | 1  | 274                     |
|                                                                        | GP                                                  | 0  |                         |
|                                                                        | Nurse led                                           | 0  |                         |
|                                                                        | Transition of care                                  | 0  |                         |
| <b>Mechanical devices</b>                                              |                                                     |    |                         |
|                                                                        | Absorbent products                                  | 0  |                         |
|                                                                        | Anal plugs                                          | 3  | 278-280                 |
|                                                                        | Anal pouch                                          | 0  |                         |
|                                                                        | Commodes                                            | 2  | 223,225                 |
|                                                                        | Inserts (including vaginal inserts)                 | 0  |                         |
|                                                                        | Managing condition                                  | 2  | 91,281                  |
|                                                                        | New devices (e.g. intra-rectal diversion devices)   | 2  | 281,282                 |
|                                                                        | Rectal catheters (used for critically ill patients) | 1  | 283                     |
|                                                                        | Rectal trumpet (off-label use)                      | 0  |                         |
|                                                                        | Vaginal-bowel devices                               | 3  | 111,284,285             |
| <b>Other containment/ non-active/ other in non-neurogenic patients</b> |                                                     |    |                         |
|                                                                        | Toileting assistance programmes                     | 0  |                         |
|                                                                        | Trans-anal irrigation                               | 0  |                         |
| <b>Interventions in particular settings</b>                            |                                                     |    |                         |
|                                                                        | Acute care settings                                 | 0  |                         |

|                                                |                                                               |    |                                        |
|------------------------------------------------|---------------------------------------------------------------|----|----------------------------------------|
|                                                | Bowel management in low-resource settings                     | 0  |                                        |
|                                                | Improvements to physical environment                          | 2  | 223,225                                |
|                                                | Products for odour and sounds                                 | 0  |                                        |
|                                                | Toileting assistance programmes                               | 0  |                                        |
|                                                | Wireless technology monitoring wetness sensors - nursing home | 1  | 286                                    |
| <b>Interventions in particular populations</b> |                                                               |    |                                        |
|                                                | Diabetes and FI                                               | 0  |                                        |
|                                                | Management of FI for cancer patients                          | 10 | 96,116,118,121,145,147,149,174,250,267 |
|                                                | Post-menopausal women                                         | 0  |                                        |
|                                                | Pregnant/post-partum women                                    | 1  | 122                                    |
| <b>Other</b>                                   |                                                               |    |                                        |
|                                                | Compliance                                                    | 0  |                                        |
|                                                | Dermatitis                                                    | 4  | 177,222-224                            |
|                                                | Diagnostic tools                                              | 5  | 127,215,217,269,287                    |
|                                                | Financial support                                             | 0  |                                        |
|                                                | Microbial transplant                                          | 1  | 135                                    |
|                                                | Pressure sores                                                | 0  |                                        |
|                                                | Psychological support                                         | 0  |                                        |
|                                                | Qualitative research/ mixed methods/ lived experiences        | 0  |                                        |
|                                                | Quality of life                                               | 5  | 96,200,203,216,250                     |
|                                                | Technology                                                    | 1  | 158                                    |
|                                                | Treatments that are not pharmaceuticals or naturopathic       | 0  |                                        |
|                                                | Unsure                                                        | 0  |                                        |
| <b>Out of scope</b>                            |                                                               |    |                                        |
|                                                | Disposal of products                                          | 0  |                                        |
|                                                | Mechanisms and causes                                         | 0  |                                        |
|                                                | Prevalence                                                    | 0  |                                        |
|                                                | Prevention of FI                                              | 0  |                                        |
